# Supplementary material for: Reduction of nemo-like kinase increases lysosome biogenesis and ameliorates TDP-43–related neurodegeneration
Source: PubMed Central journal article supplement (PMC10425213; doi:10.1172/jci138207), 2023-08-15

## Supplementary Materials

Supplemental Figure 1. Generation of isogenic *Nlk* N2a cell lines using CRISPR/Cas9.

Supplemental Figure 2. RNA-seq of *Nlk* KO cells reveals transcriptional changes associated with the autophagy-lysosome pathway.

Supplemental Figure 3. Nlk inhibits protein clearance through the autophagy-lysosome pathway.

Supplemental Figure 4. Generation of *NLK*-deficient human iPSC-derived motor neurons.

Supplemental Figure 5. Nlk has no effect on mTOR activity.

Supplemental Figure 6. Nlk does not physically interact with TDP-43.

Supplemental Figure 7. Reduction of *Nlk* improves survival and delays onset of disease in *Prp-TDP<sup>A315T/+</sup>* mice.

Supplemental Figure 8. Pharmacological reduction of *Nlk* does not induce gliosis in vivo.

Supplemental Figure 9. ASOs targeting *Nlk* ameliorate motor behavior deficits in *Thy1-TDP<sup>Tg/Tg</sup>* mice.

Supplemental Figure 10. ASOs targeting *Nlk* ameliorate motor behavior deficits in high fat/gel diet-fed *Thy1-TDP<sup>Tg/Tg</sup>* mice.

Supplemental Figure 11. ASOs targeting *Nlk* rescue pathology deficits in two TDP-43 mouse models.

Supplemental Table 1. Differential gene expression from RNA-seq of *Nlk* KO N2a cells.

Supplemental Table 2. List of differentially expressed genes related to lysosomal function, autophagy, and stress granules from RNA-seq of *Nlk* KO N2a cells.

Supplemental Video 1. ASOs targeting *Nlk* partially rescue motor impairment in *Thy1-TDP<sup>Tg/Tg</sup>* mice.

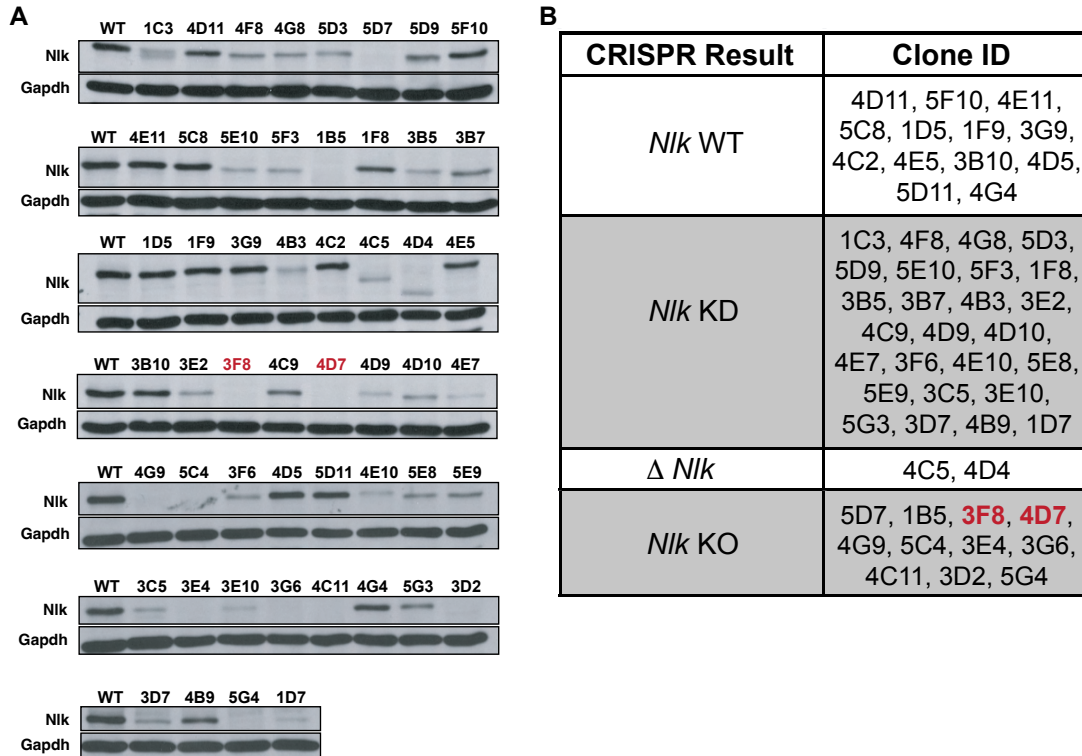

Fig. S1\_Tejwani et al.

**Supplemental Figure 1. Generation of isogenic *Nik* N2a cell lines using CRISPR/Cas9.**

(A) Western blots of protein lysates detecting the degree of mutagenesis in individual clones isolated following dual guide RNA targeting of Cas9 nickase to *Nik*.

(B) Summary of genotypes of *Nik* CRISPR clones determined remaining levels of Nik protein. WT= wild-type, KD= knock-down, KO= knock-out.  $\Delta$ = partial deletion. *Nik* KO clones 3F8 and 4D7 were selected for further experiments.

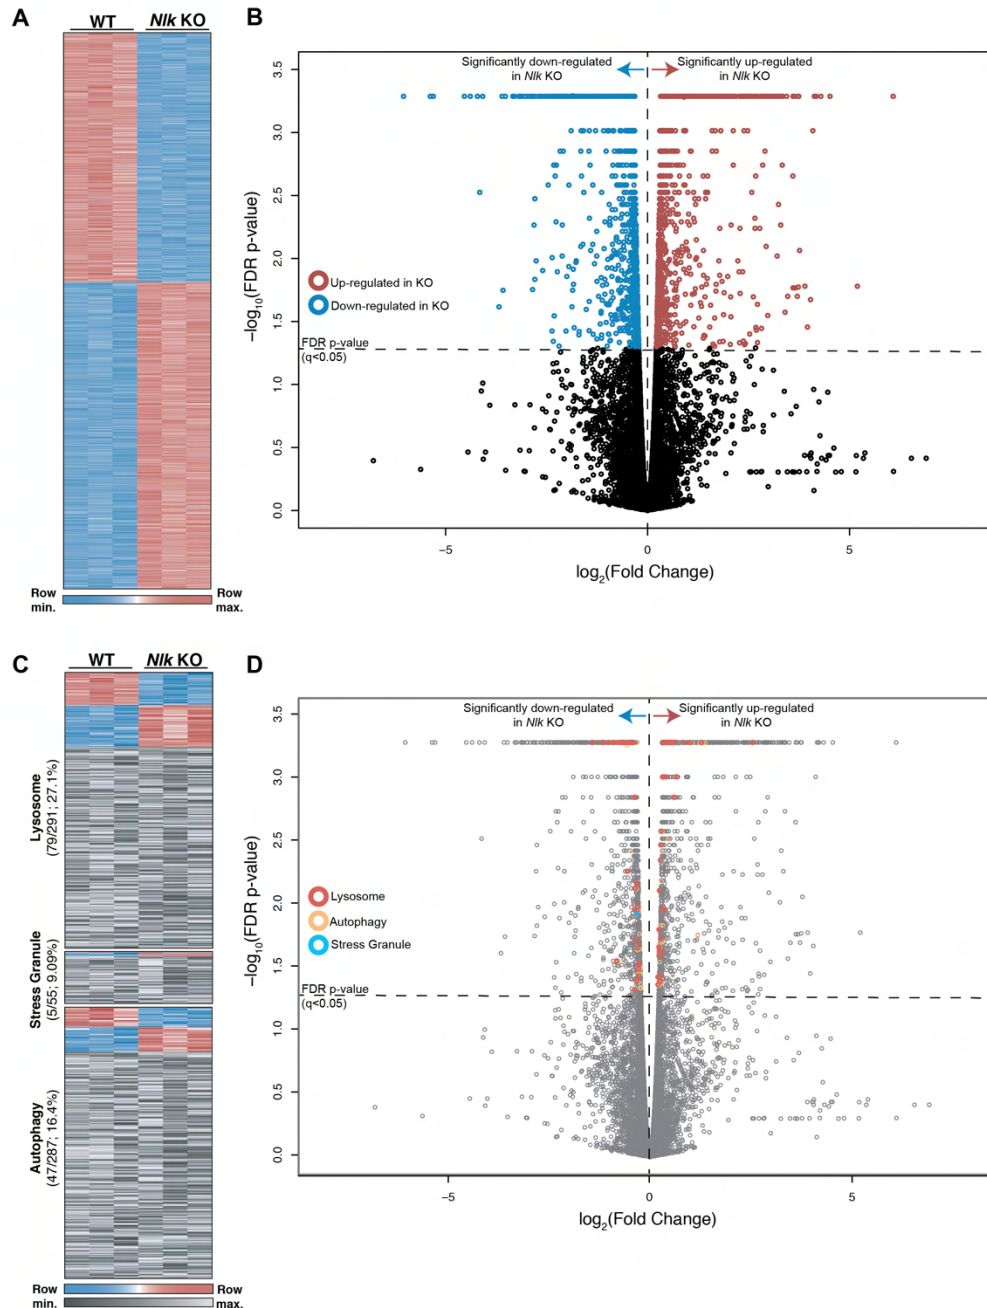

Fig. S2\_Tejwani et al.

**Supplemental Figure 2. RNA-seq of *Nik* KO cells reveals transcriptional changes associated with the autophagy-lysosome pathway.**

(A) Heatmap of all significantly altered genes from RNA-seq analysis of *Nik* KO N2a cells.

(B) Volcano plot of RNA-seq results displaying all significantly up-regulated (red) and down-regulated (blue) genes.

(C) Individual heatmaps displaying all significantly altered (blue/red) and not significantly altered (gray) annotated lysosome, autophagy, stress granule-associated genes with detectable expression.

(D) Volcano plot of RNA-seq results with differentially-expressed lysosome, autophagy, and stress granule-associated genes.

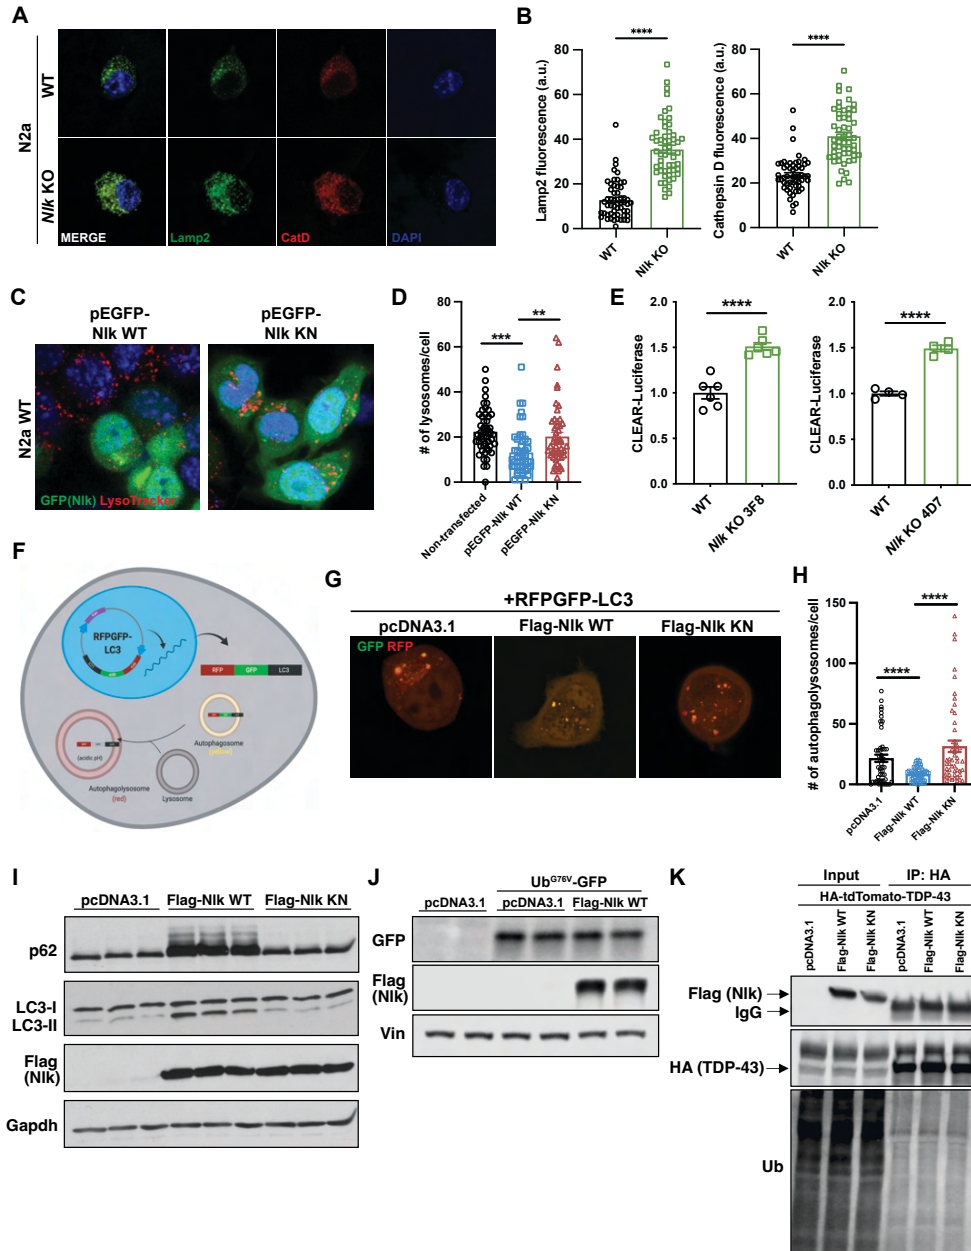

Fig. S3\_Tejwani et al.

### Supplemental Figure 3. Nlk inhibits protein clearance through the autophagy-lysosome pathway.

(A and B) Representative immunofluorescence images of Lamp2<sup>+</sup> and CatD<sup>+</sup> lysosomes in WT and *Nlk* KO N2a cells (A), quantified in (B).

(C and D) LysoTracker imaging of N2a WT cells transfected with EGFP-tagged WT or KN Nlk. Cells successfully transfected with WT Nlk (green) contained fewer LysoTracker-positive vesicles compared to non-transfected cells or cells transfected with kinase-inactive Nlk (Nlk KN), quantified in (D).

(E) CLEAR-Luciferase assay in two independent *Nlk* KO N2a clones (pooled in Figure 1K).

(F) Schematic detailing the tandem fluorescently-tagged RFP-GFP-LC3. Transfected cells express the RFP-GFP-LC3 fusion protein, which is trafficked into autophagosomes, where red and green co-localized fluorescence will be observed. Upon fusion with a lysosome, the green fluorescence is quenched by the pH of the lysosome and red-labeled vesicles can be detected.

**(G and H)** Representative images of N2a WT cells co-transfected with RFP-GFP-LC3 and Flag-Nlk WT or Flag-Nlk KN **(G)**. Overexpression of WT Nlk reduced the number of autophagolysosomes (red) **(H)**.  
**(I)** Western blots showed accumulation of p62 and LC3-II due to the failure of lysosome-dependent degradation in cells with WT Nlk overexpression.  
**(J)** Western blots of N2a cells transfected with Ub<sup>G76V</sup>-GFP 26S proteasome activity reporter. Overall proteasome activity was not significantly changed with Nlk overexpression.  
**(K)** Co-immunoprecipitation showing that Nlk overexpression did not promote ubiquitination of TDP-43. Two-tailed t-tests were performed and mean±SEM are displayed. \*\*p<0.01, \*\*\*p<0.001, \*\*\*\*p<0.0001.

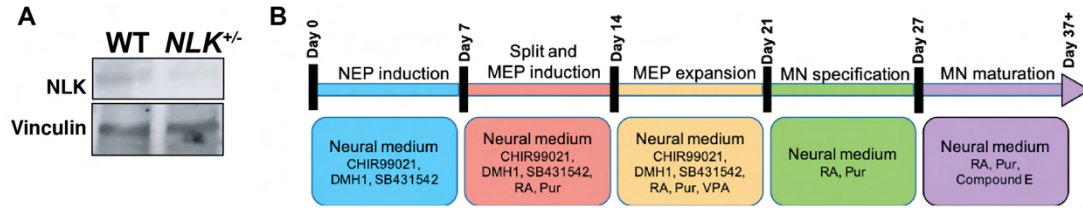

Fig. S4\_Tejwani et al.

**Supplemental Figure 4. Generation of *NLK*-deficient human iPSC-derived motor neurons.**

- (A) Western blots of day 38 WT and isogenic *NLK* heterozygous clones differentiated into motor neurons.  
 (B) Schematic detailing the protocol for generation of spinal motor neurons from iPSCs.

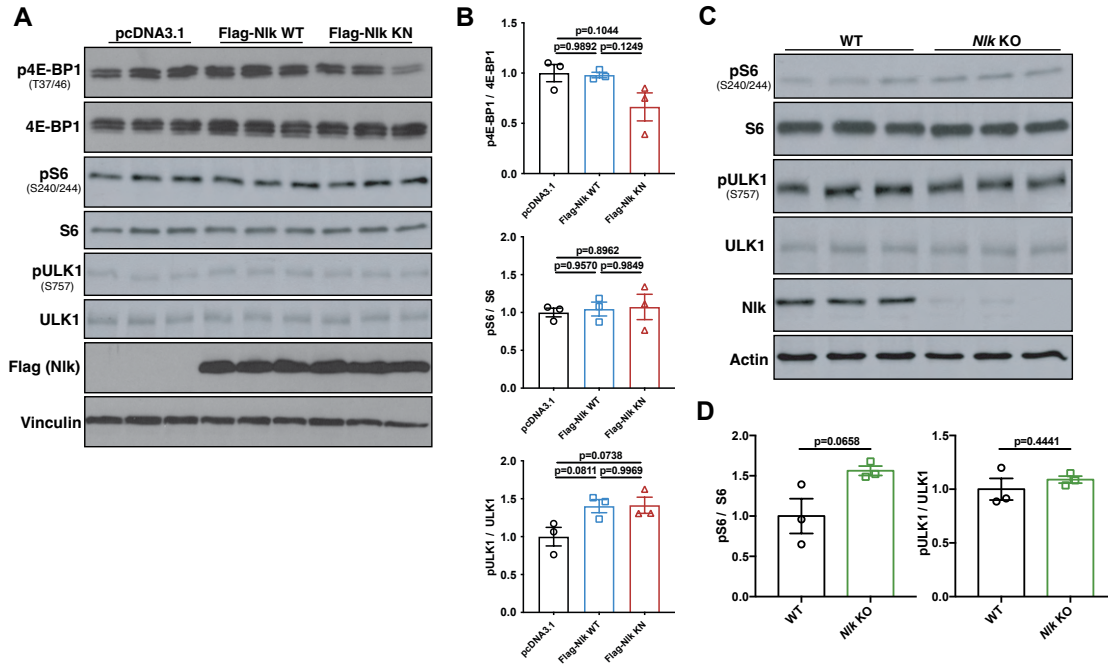

Fig. S5\_Tejwani et al.

**Supplemental Figure 5. Nlk has no effect on mTOR activity.**

(A and B) Western blots of N2a whole-cell protein lysates showed WT Nlk or KN Nlk overexpression did not affect p4E-BP1/4E-BP1, pS6/S6, or pULK1/ULK1 ratios, suggesting mTOR independence (A), quantified in (B).

(C and D) Western blots of N2a whole-cell protein lysates showed *Nlk* KO did not affect pS6/S6 or pULK1/ULK1 ratios (C), quantified in (D).

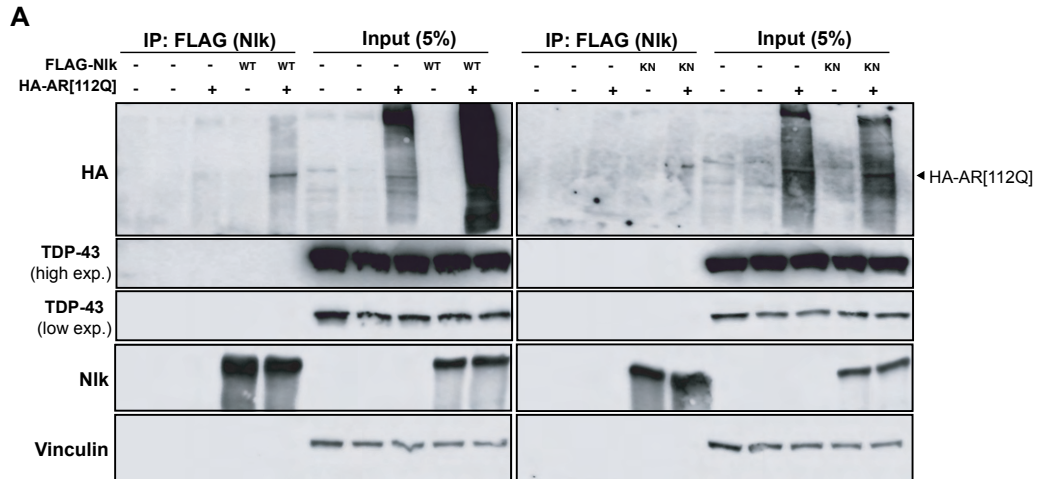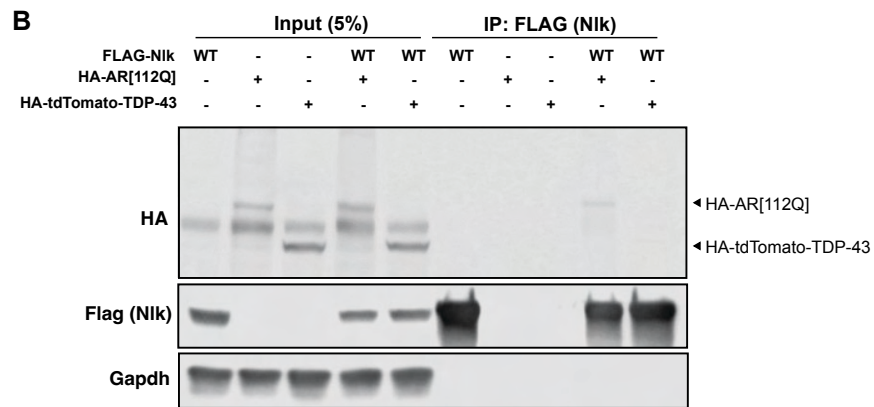

Fig. S6\_Tejwani et al.

**Supplemental Figure 6. Nlk does not physically interact with TDP-43.**

(A and B) Co-immunoprecipitation showing that WT Nlk and KN Nlk interact with AR but not with endogenous TDP-43 (A) or overexpressed TDP-43 (B). Interaction of Nlk with AR serves as a positive control (see ref. 8).



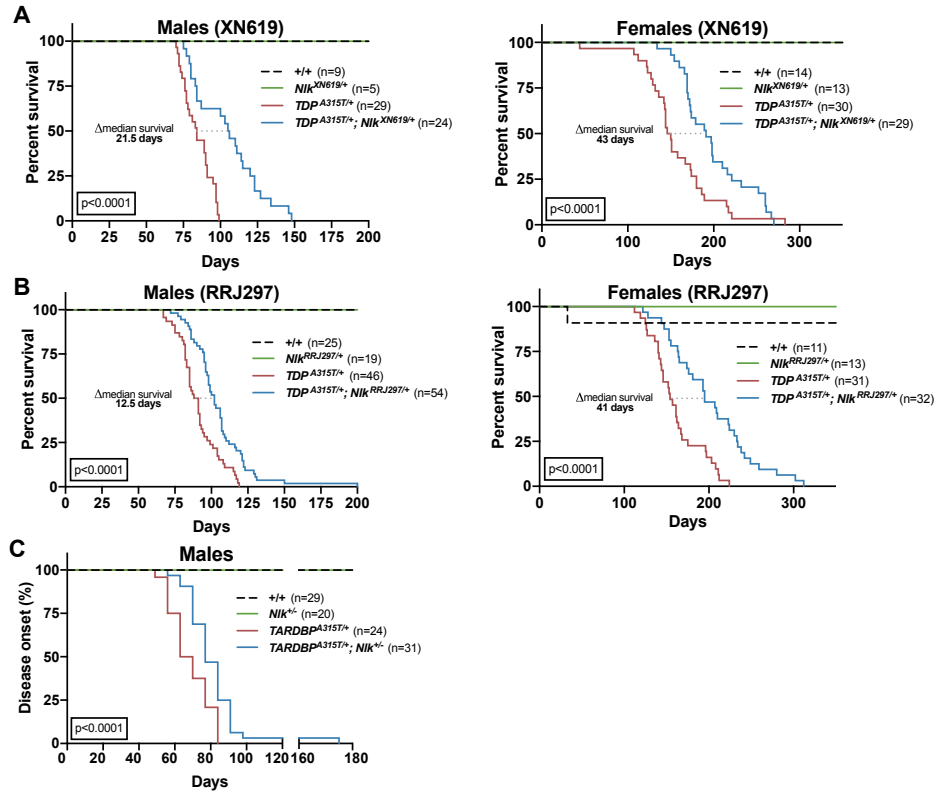

Fig. S7\_Tejwani et al.

**Supplemental Figure 7. Reduction of *Nik* improves survival and delays onset of disease in *Prp-TDP<sup>A315T/+</sup>* mice.**

- (A) Kaplan-Meier survival curves showing 50% reduction of *Nik* by crossing *Prp-TDP<sup>A315T/+</sup>* mice with *Nik<sup>XN619/+</sup>* improved male and female animal survival. Curves were compared by long-rank test.
- (B) Kaplan-Meier survival curves showing 50% reduction of *Nik* by crossing *Prp-TDP<sup>A315T/+</sup>* mice with *Nik<sup>RRJ297/+</sup>* improved male and female animal survival. Curves were compared by log-rank test.
- (C) Kaplan-Meier curves showing 50% reduction of *Nik* by crossing *Prp-TDP<sup>A315T/+</sup>* mice with *Nik<sup>+/-</sup>* significantly slowed time to disease onset (defined by the earliest time point in which weight gain was no longer observed) in male mice.

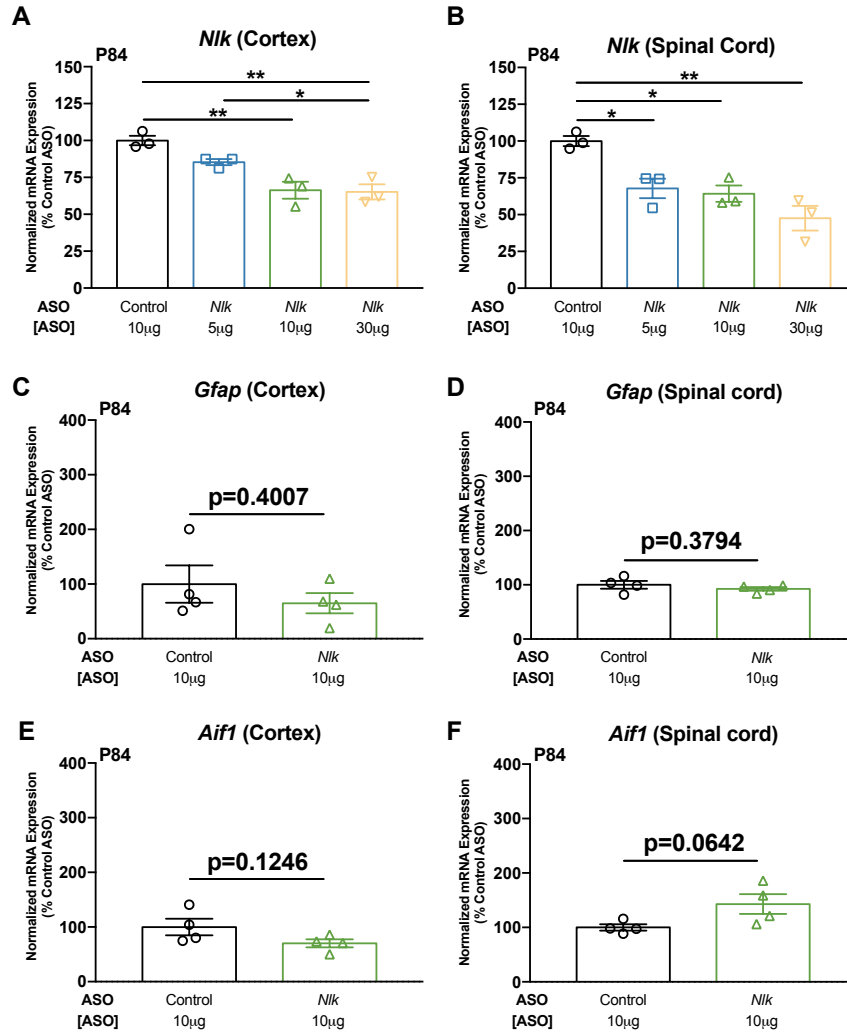

Fig. S8\_Tejwani et al.

**Supplemental Figure 8. Reduction of *Nlk* does not induce gliosis in vivo.**

(A-F) P1 delivery of *Nlk* ASOs reduced *Nlk* mRNA levels in a dose-dependent manner (A and B) without inducing an overt astrogliosis (C and D) or microgliosis (E and F) in the cortex and spinal cord of P84 animals.

One-way ANOVA analyses were performed to compare effects of varying ASO dosage. Two-tailed t-tests were performed to compare conditions unless otherwise noted and mean±SEM are displayed. \*p<0.05, \*\*p<0.01.



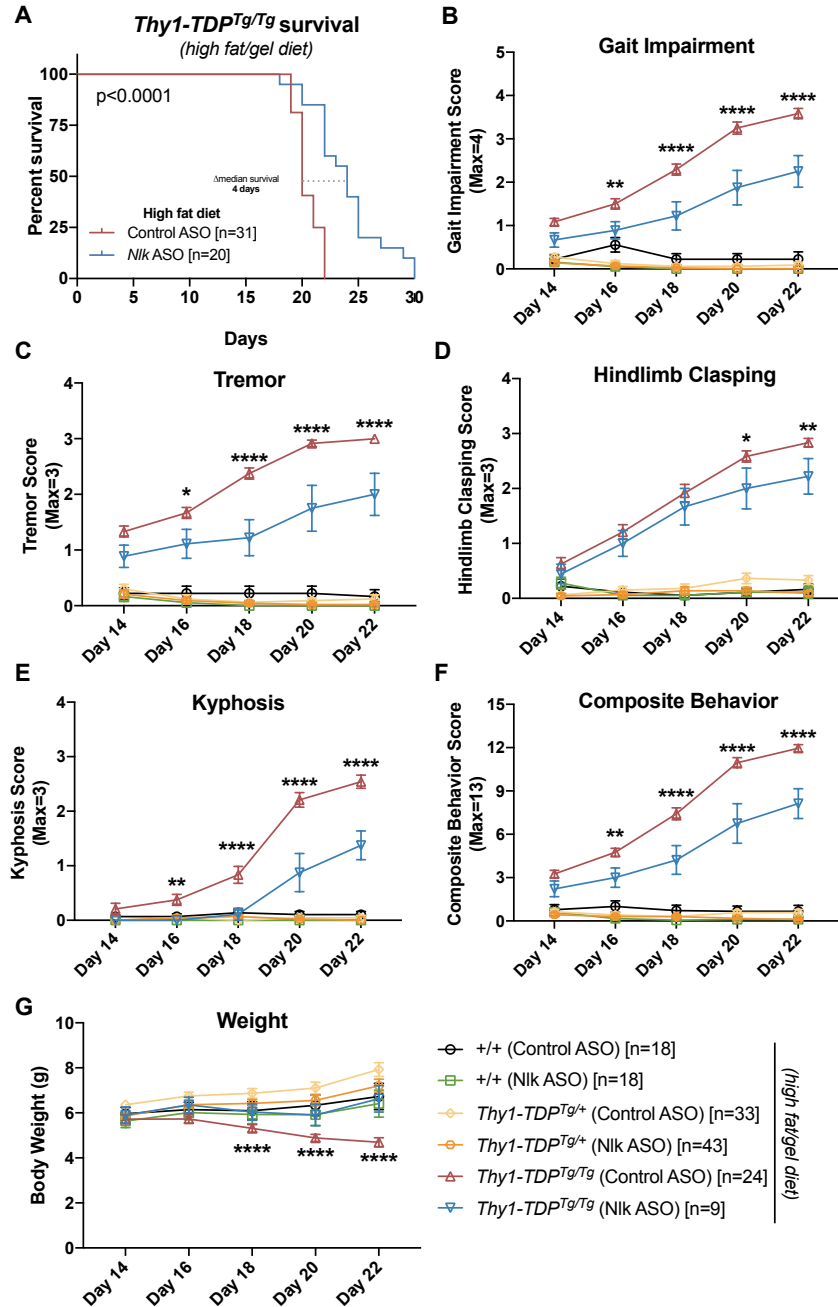

Fig. S10\_Tejwani et al.

**Supplemental Figure 10. ASOs targeting *Nlk* ameliorate motor behavior deficits in high fat/gel diet-fed *Thy1-TDP<sup>Tg/Tg</sup>* mice.**

(A) Kaplan-Meier survival curves showing administration of 10 $\mu$ g *Nlk* ASO at P1 increased *Thy1-TDP<sup>Tg/Tg</sup>* animal survival. Curves were compared by log-rank test.

(B-G) *Nlk* ASO administration reduced gait impairment (B), tremor (C), hindlimb claspings (D), kyphosis (E), composite motor score (F), and prevented weight loss (G) in *Thy1-TDP<sup>Tg/Tg</sup>* animals between P14-P22. One-way ANOVA analyses were performed to compare all listed genotypes/treatments per day unless otherwise noted and mean $\pm$ SEM are displayed. \*p<0.05, \*\*p<0.01, \*\*\*\*p<0.0001.

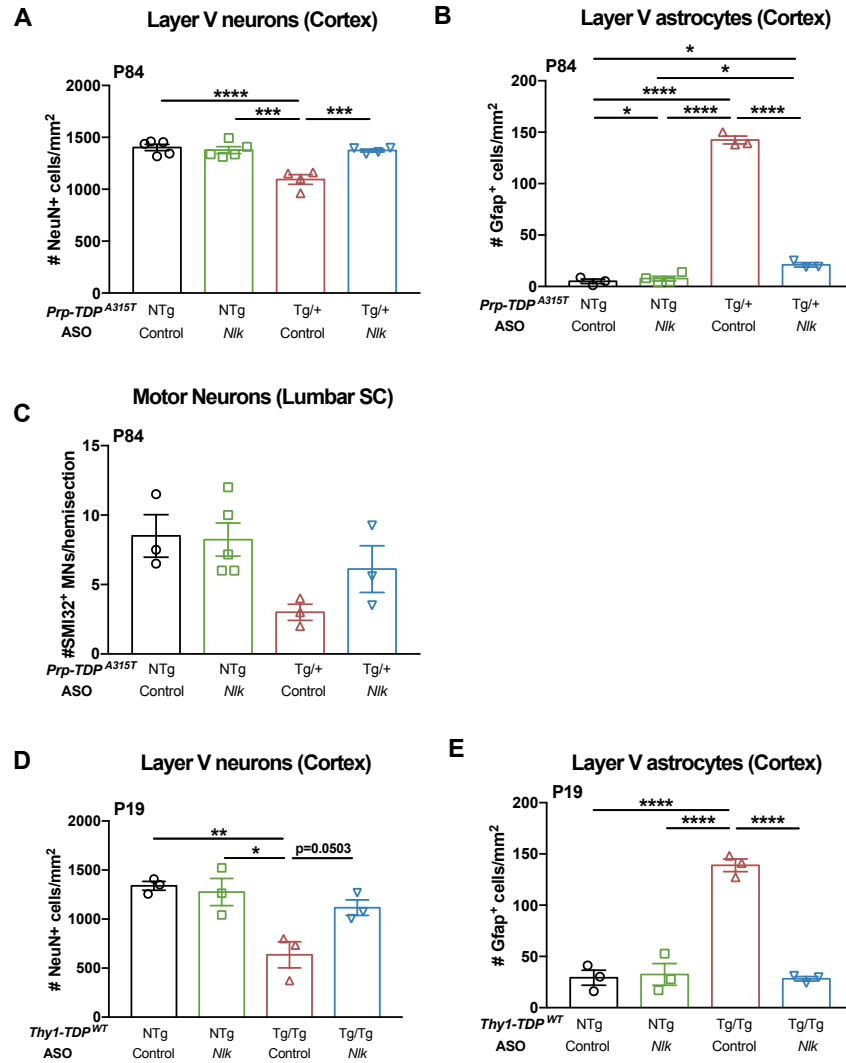

Fig. S11\_Tejwani et al.

**Supplemental Figure 11. ASOs targeting *Nlk* rescue pathology deficits in two TDP-43 mouse models.**

(A-C) Administration of 10 $\mu$ g of *Nlk* ASO at P1 rescued loss of layer V cortical neurons (A; n= 4-5 animals), layer V astrogliosis (B; n= 3-4 animals), and lumbar spinal cord (SC) motor neuron loss (C; n= 3-5 animals) in P84 *Prp-TDP*<sup>A315T/+</sup> male mice.

(D and E) 10 $\mu$ g of *Nlk* ASO at P1 rescued loss of layer V cortical neurons (D; n= 3 animals) and layer V astrogliosis (E; n= 3 animals) in *Thy1-TDP*<sup>Tg/Tg</sup> mice at P19.

One-way ANOVA analyses were performed to compare all listed genotypes/conditions and mean $\pm$ SEM are displayed. \*p<0.05, \*\*p<0.01, \*\*\*p<0.001, \*\*\*\*p<0.0001.

**Supplemental Table 1. Differential gene expression from RNA-seq of *Nlk* KO N2a cells.** Processed and normalized differential gene expression data from RNA-seq comparing transcriptomes of *Nlk* KO N2a cells to isogenic controls. Mean expression data from triplicates were compared and FDR-adjusted p-value ( $q < 0.05$ ) was used to determine significance.

**Supplemental Table 2. List of differentially expressed genes related to lysosomal function, autophagy, and stress granules from RNA-seq of *Nlk* KO N2a cells.** Processed and normalized differential gene expression data from RNA-seq comparing transcripts of interest related to lysosomal function, autophagy, and stress granule biology from *Nlk* KO N2a cells RNA-seq. Mean expression data from triplicates were compared and FDR-adjusted p-value ( $q < 0.05$ ) was used to determine significance.

**Supplemental Video 1. ASOs targeting *Nlk* partially rescue motor impairment in *Thy1-TDP<sup>Tg/Tg</sup>* mice.** *Thy1-TDP<sup>Tg/Tg</sup>* mice injected with control ASO displayed a rapid stereotyped decline between P18 and P19, necessitating euthanasia. *Thy1-TDP<sup>Tg/Tg</sup>* mice injected with 10 $\mu$ g of *Nlk* ASO at P1 retained motor abilities beyond P19.

Raw Western blots for  
Tejwani et al.

# Figure 1E- Ifitm3

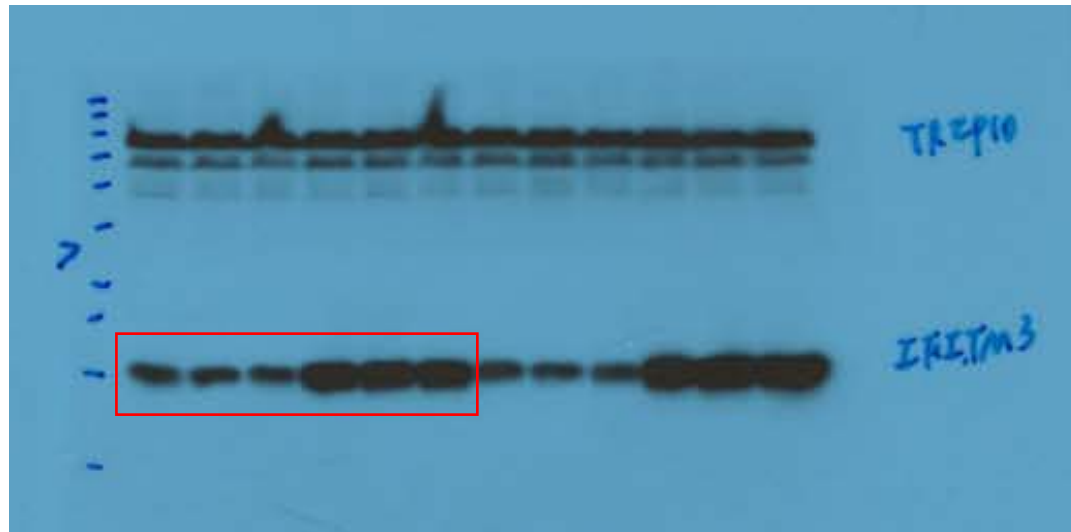





# Figure 1E- Vinculin

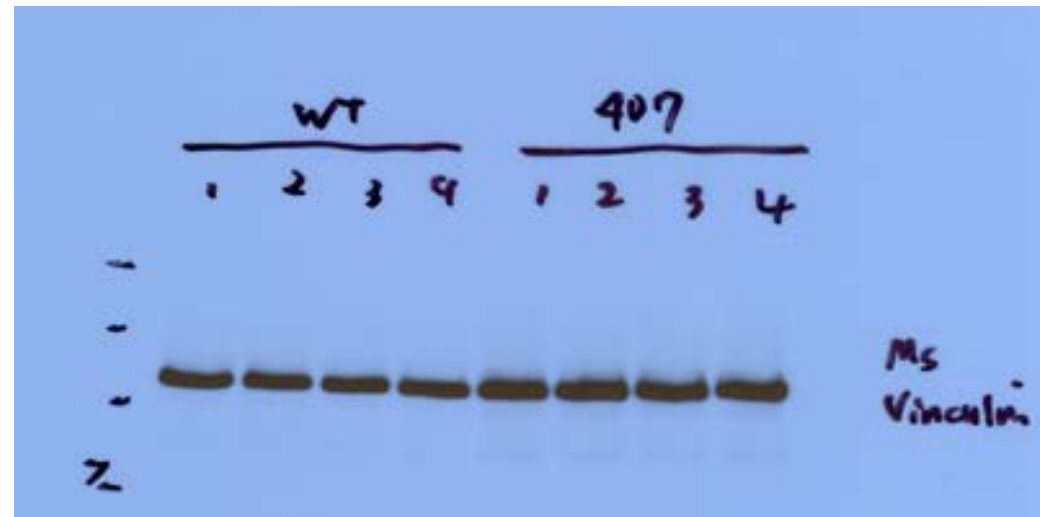

Figure 1E- Lamp2a

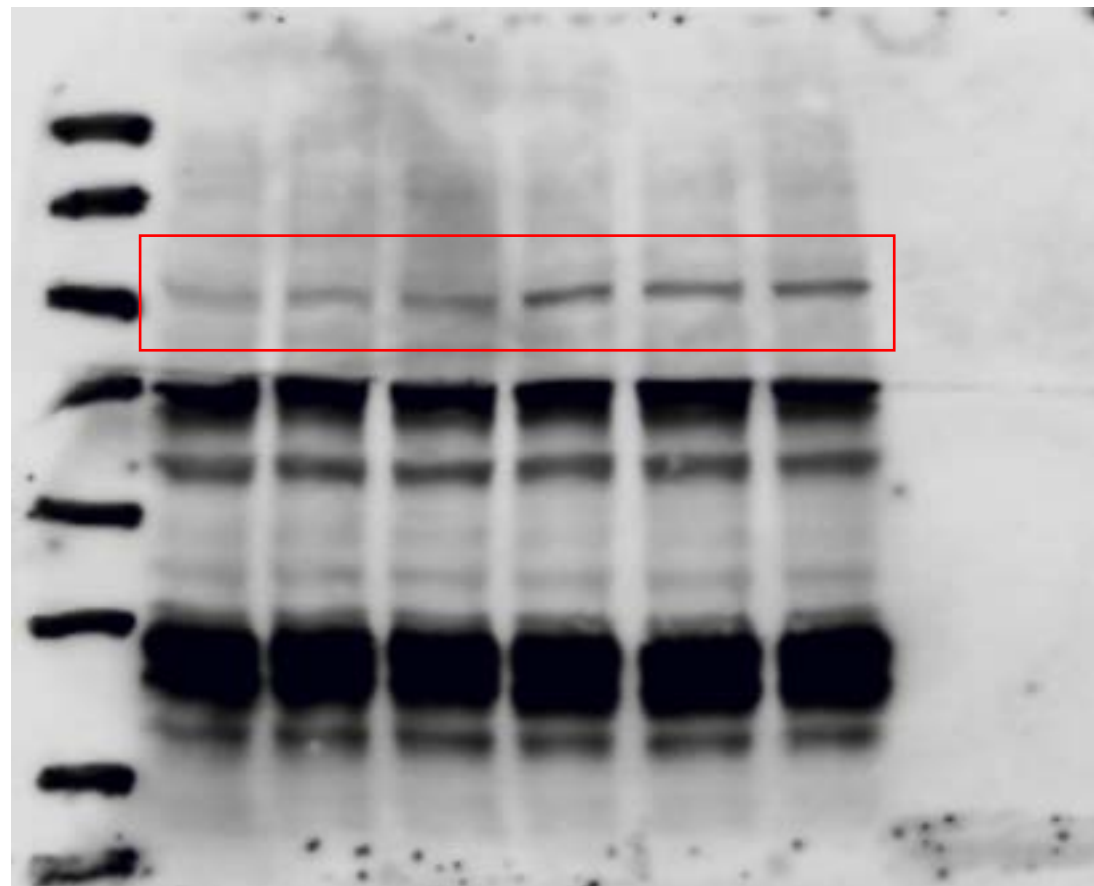

Figure 1E- CatD

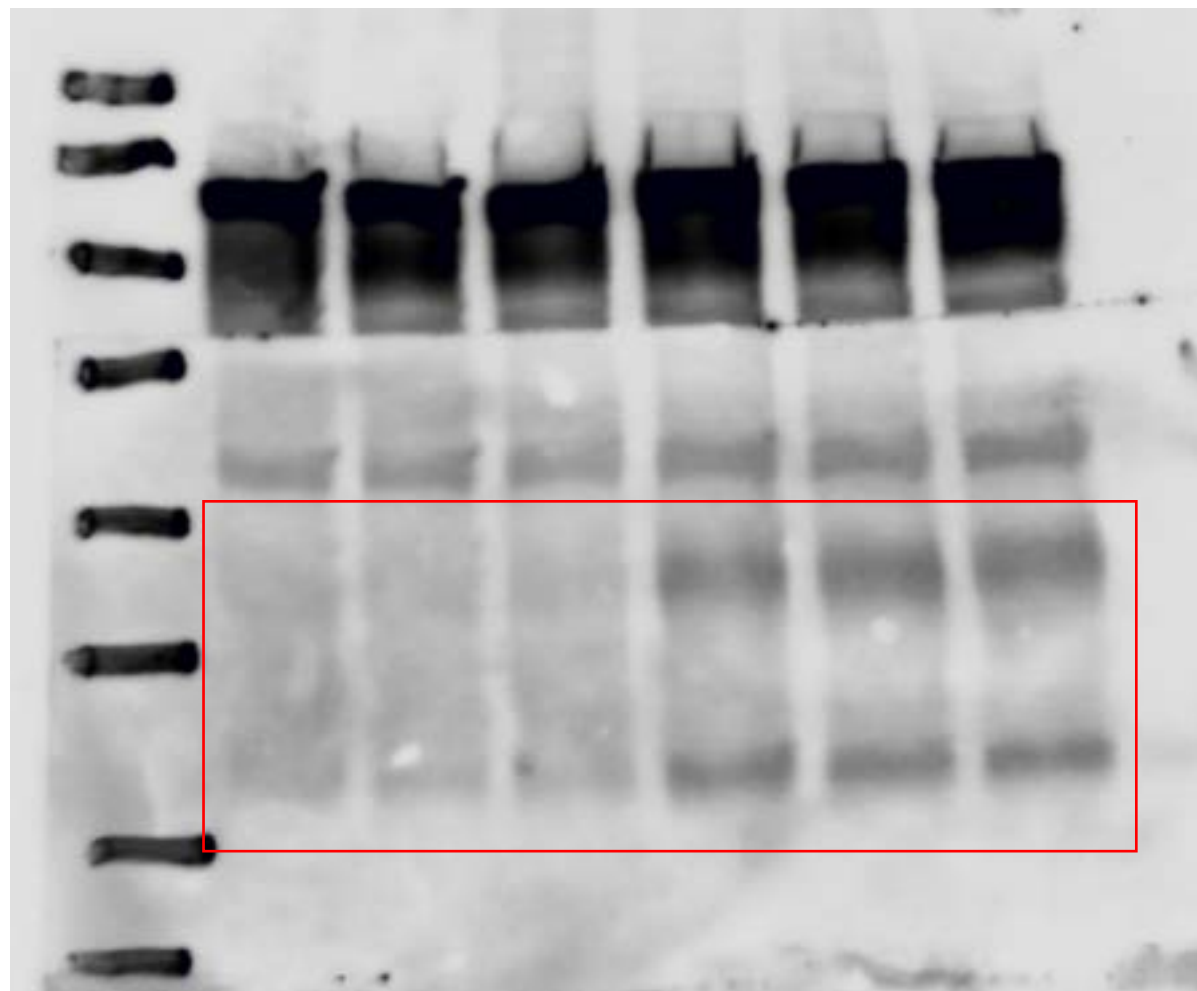

# Figure 1E- Vinculin

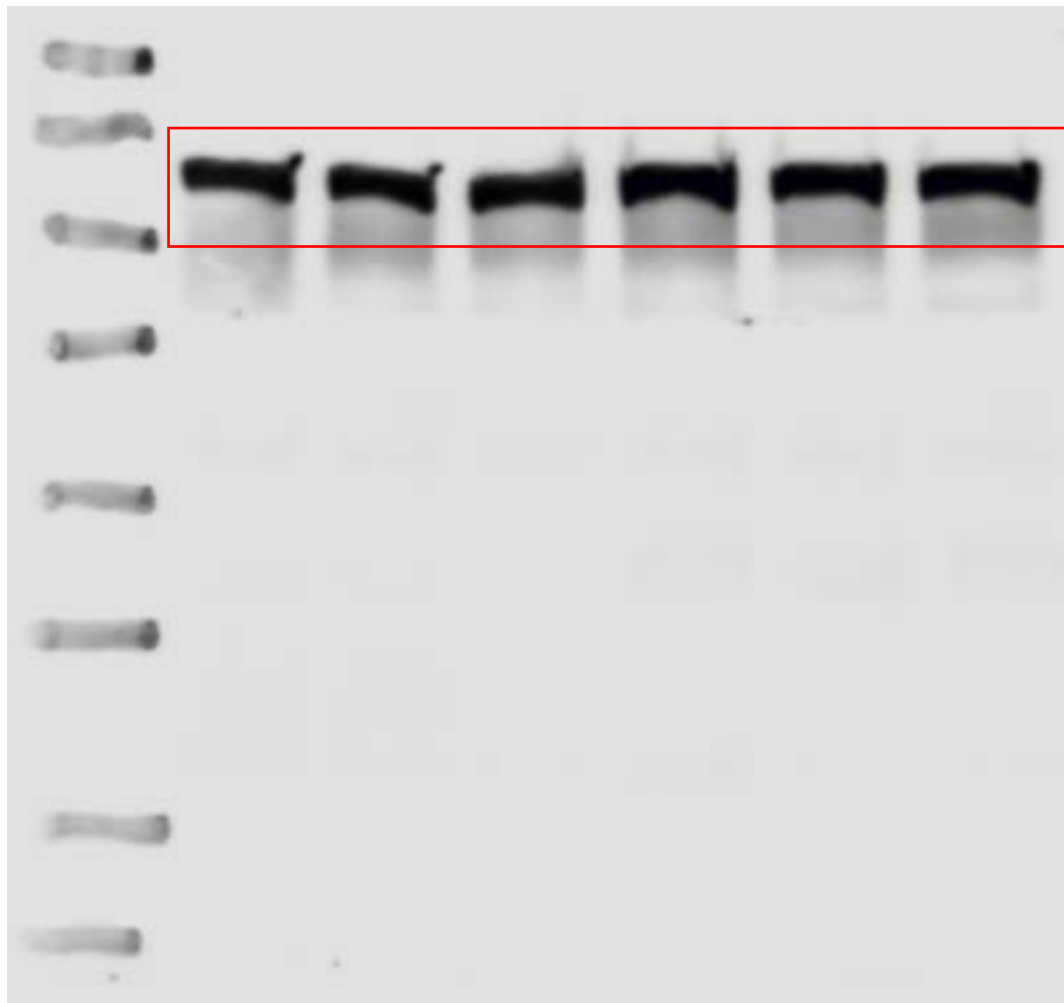

# Figure 1E- Gapdh

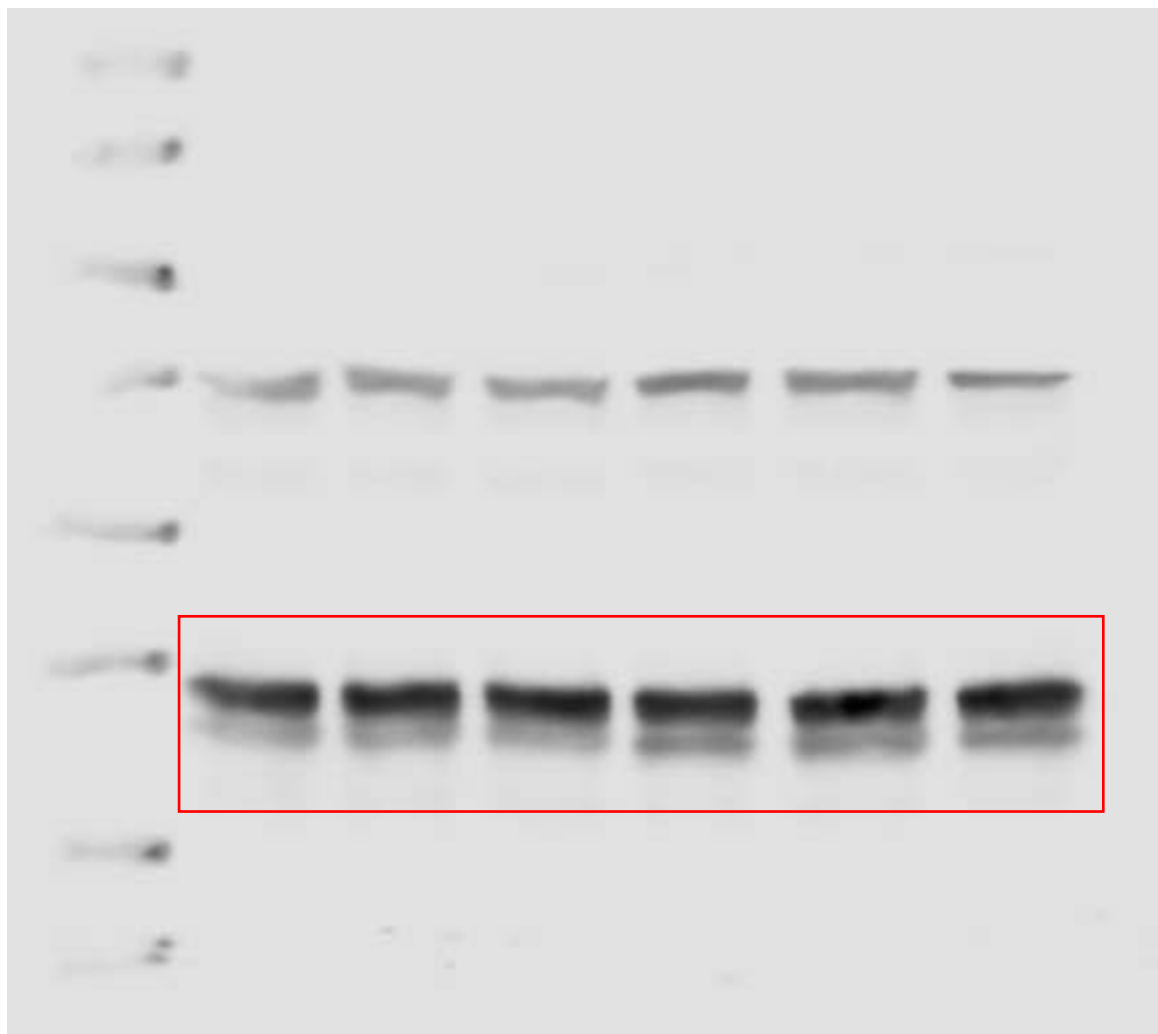

# Figure 1M- LC3

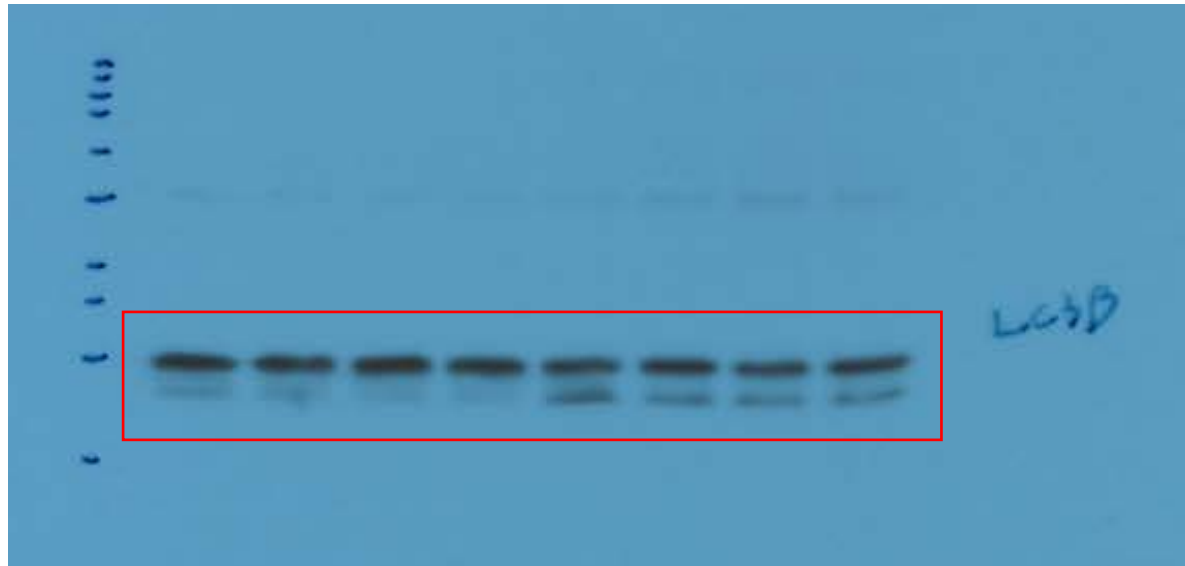

# Figure 1M- p62

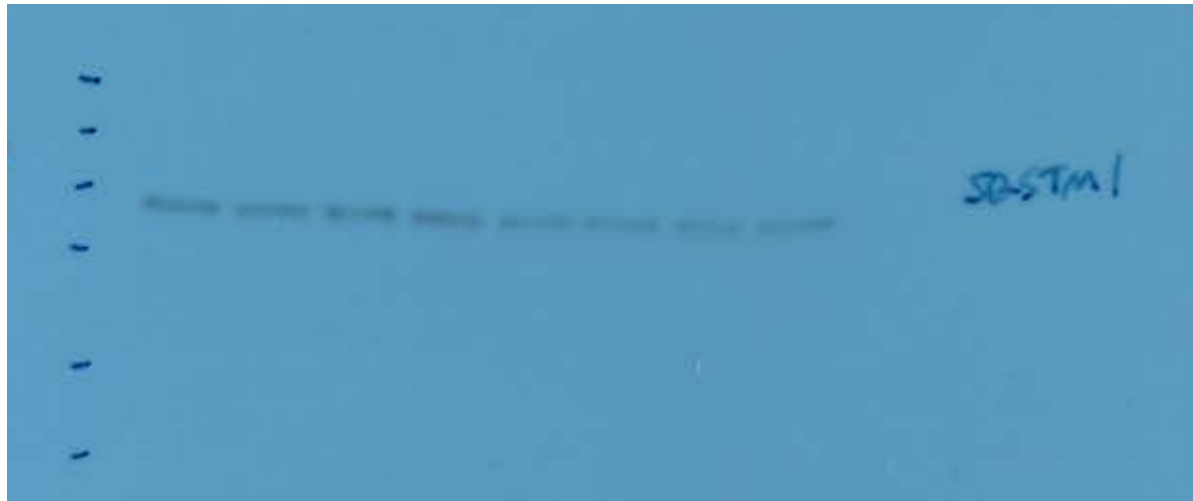



# Figure 1M- NIK

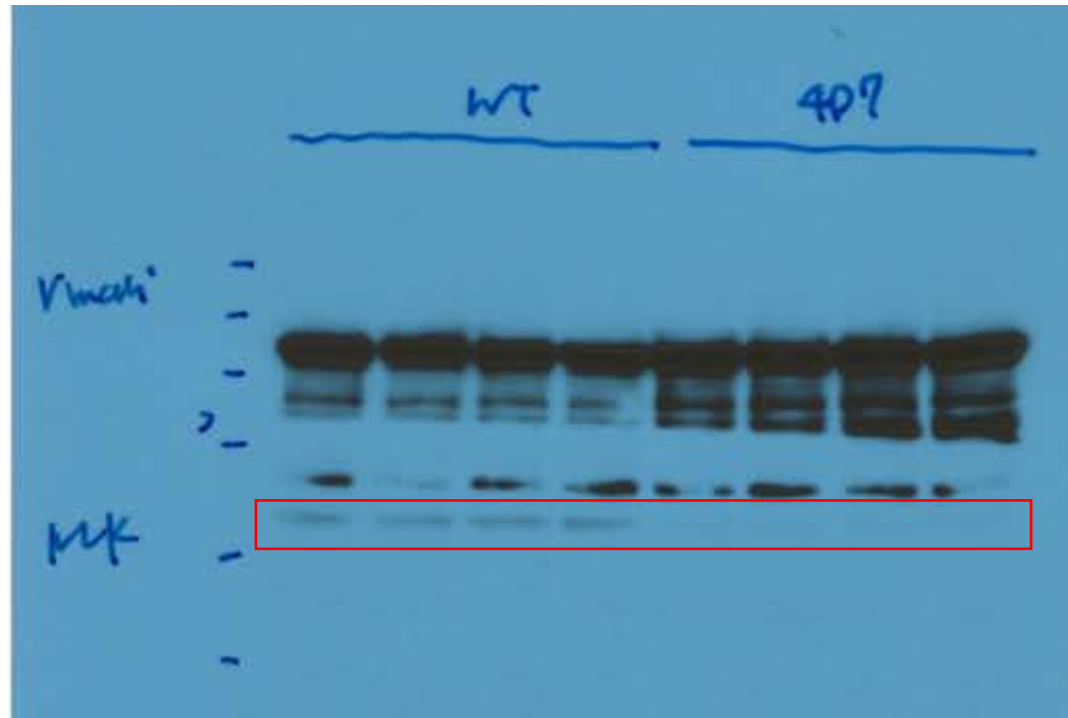

# Figure 1M- Vinculin

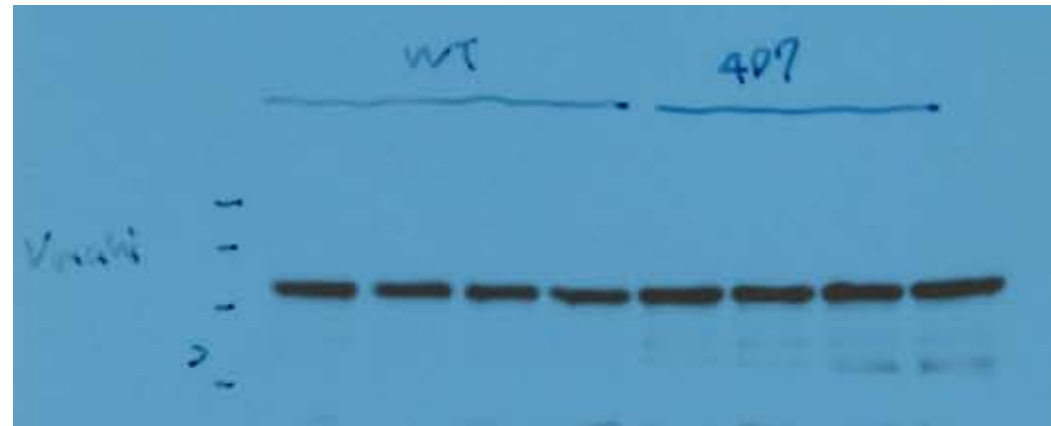

# Figure 2A- Tfeb

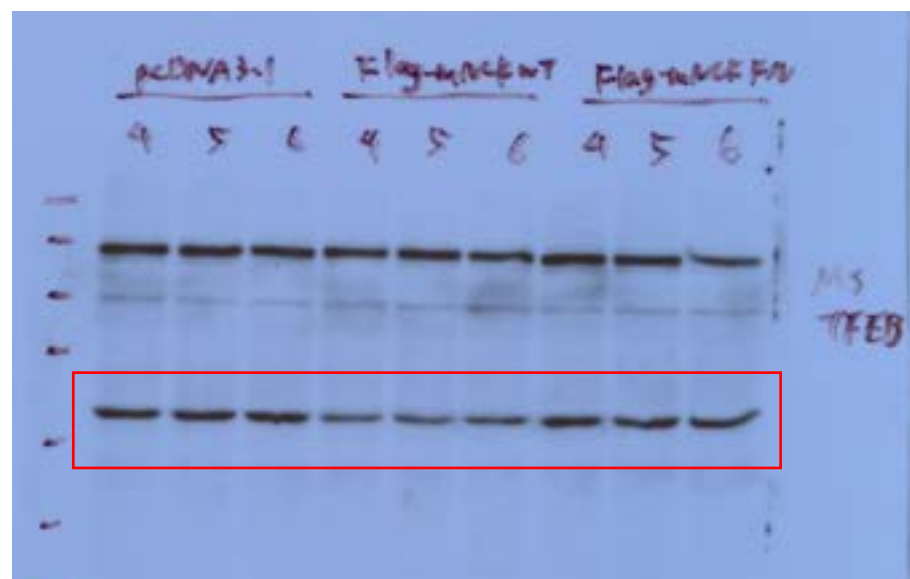

# Figure 2A- Flag (NIK)

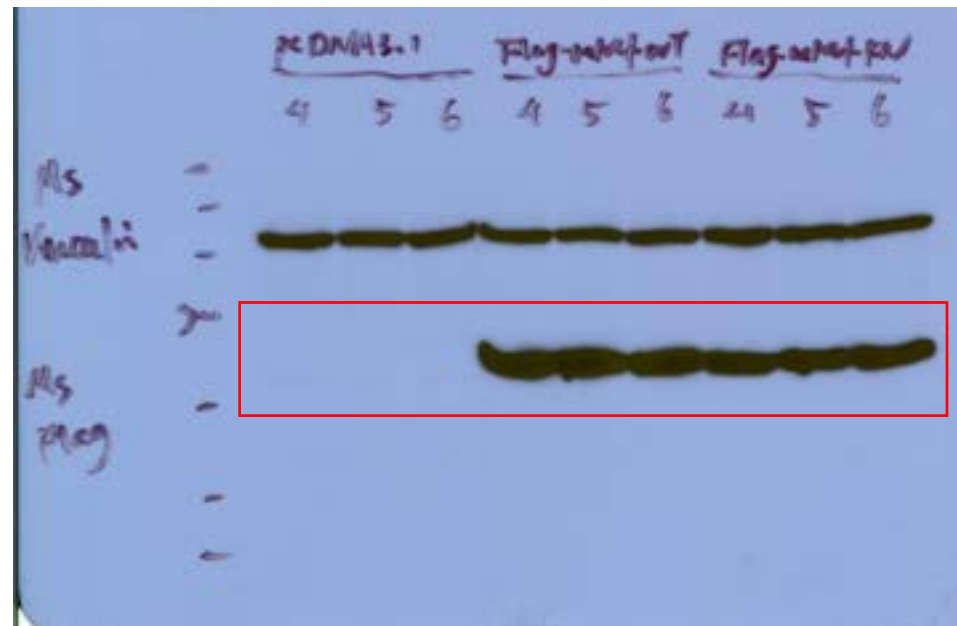

# Figure 2A- Vinculin

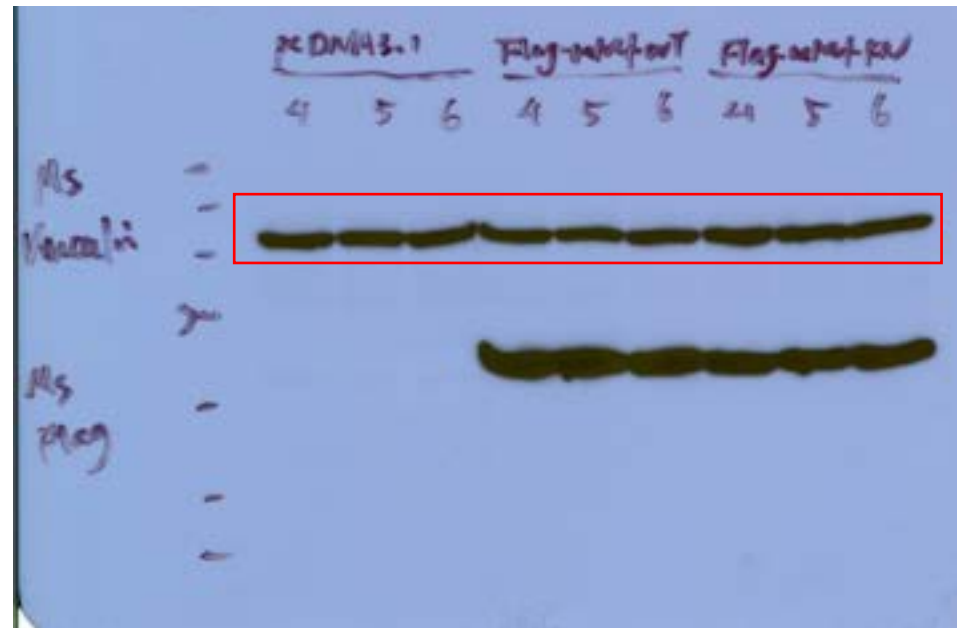

# Figure 2C- Tfeb (Cytosol)

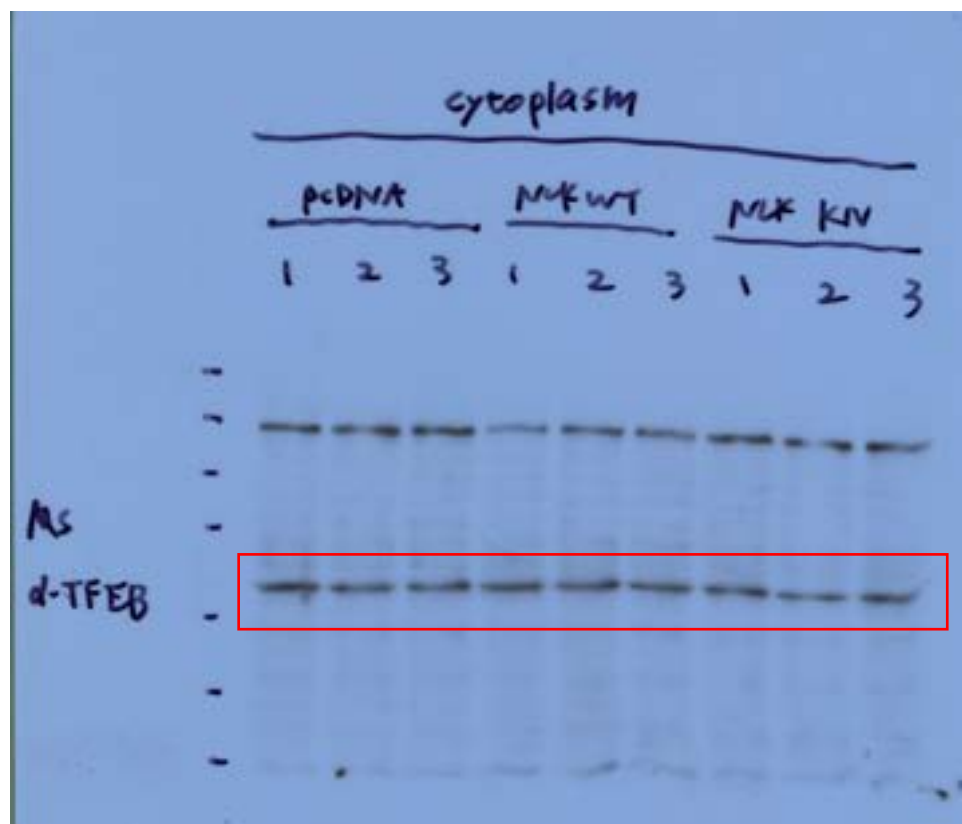

# Figure 2C- Tubulin (Cytosol)

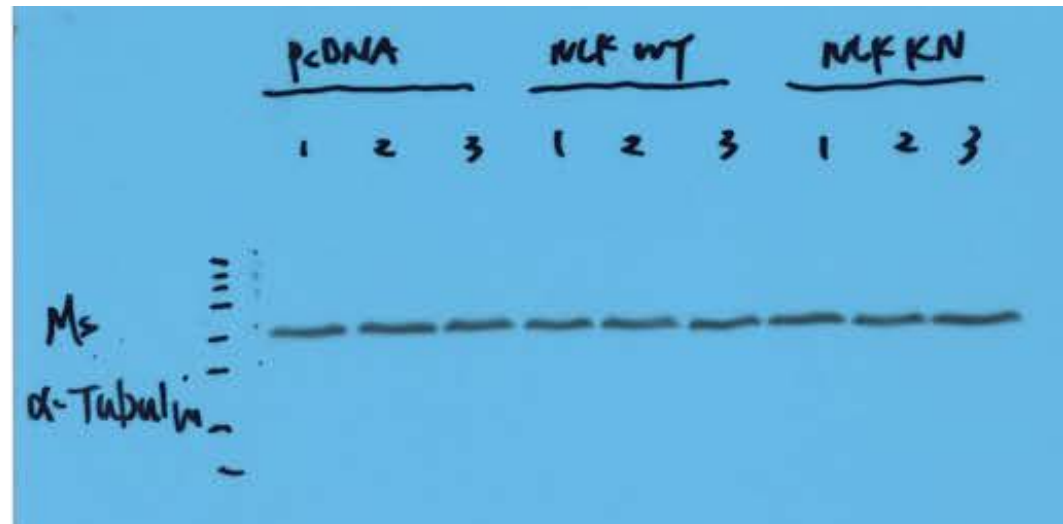







# Figure 2E- Tfeb (DMSO)

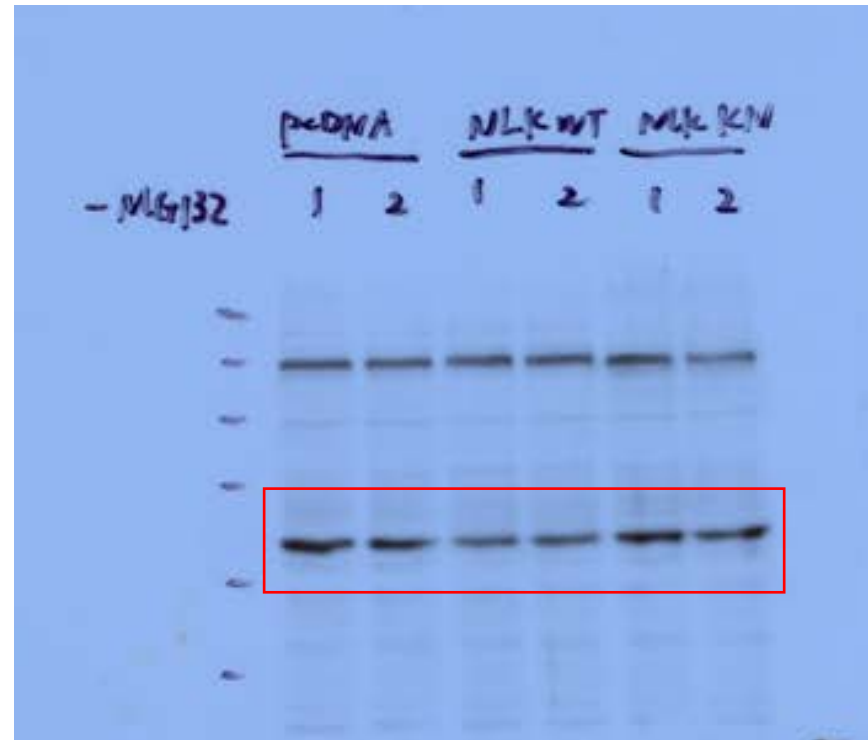

# Figure 2E- Tfeb MG132

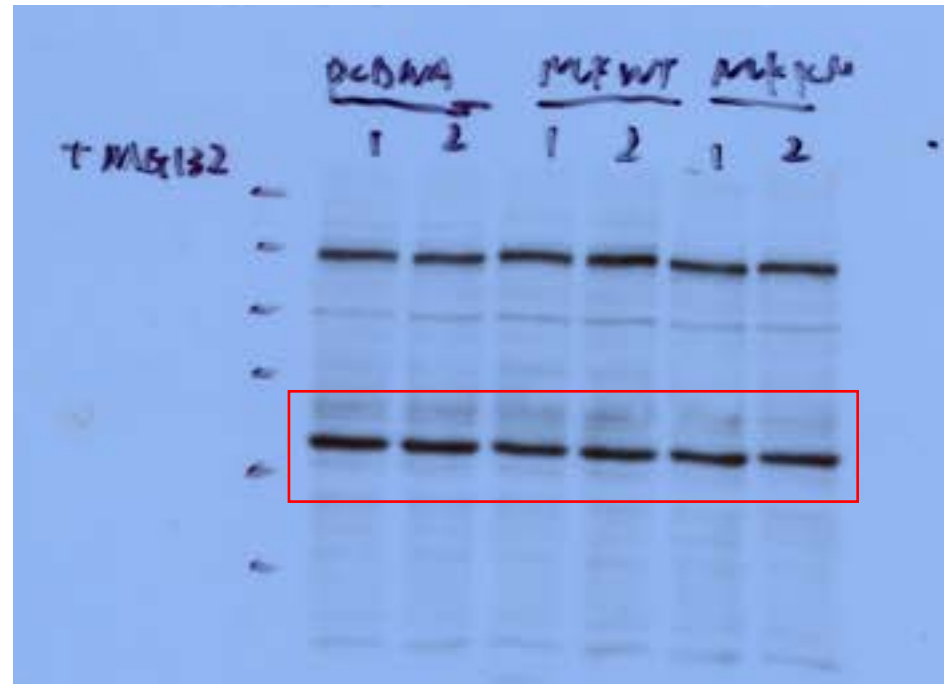

# Figure 2E- Flag DMSO

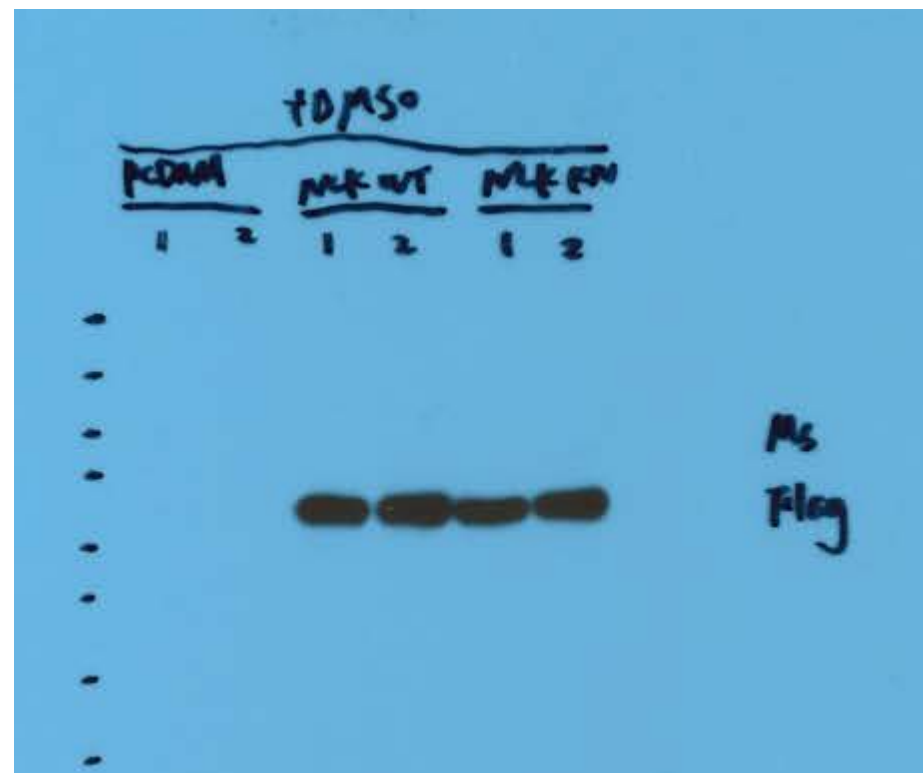

# Figure 2E- Flag MG132

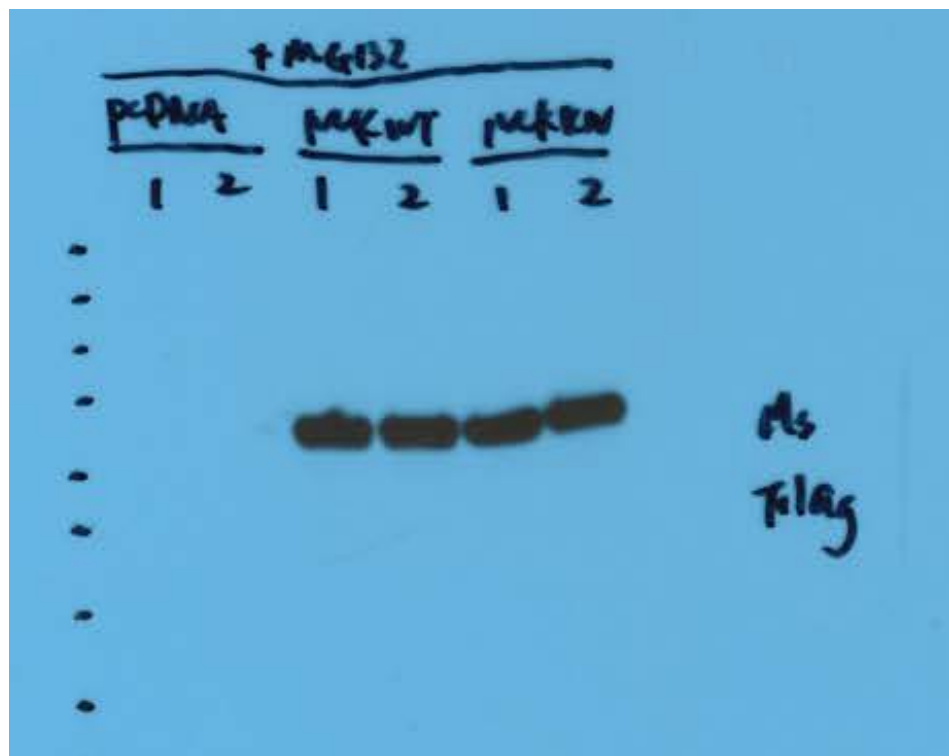

# Figure 2E- Vinculin DMSO

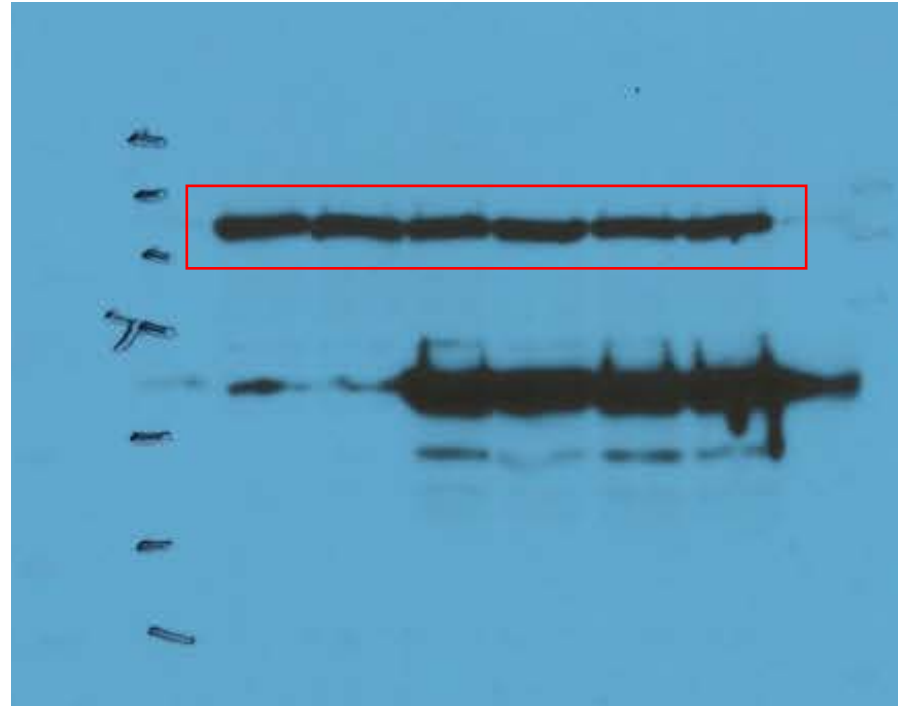

# Figure 2E- Vinculin MG132

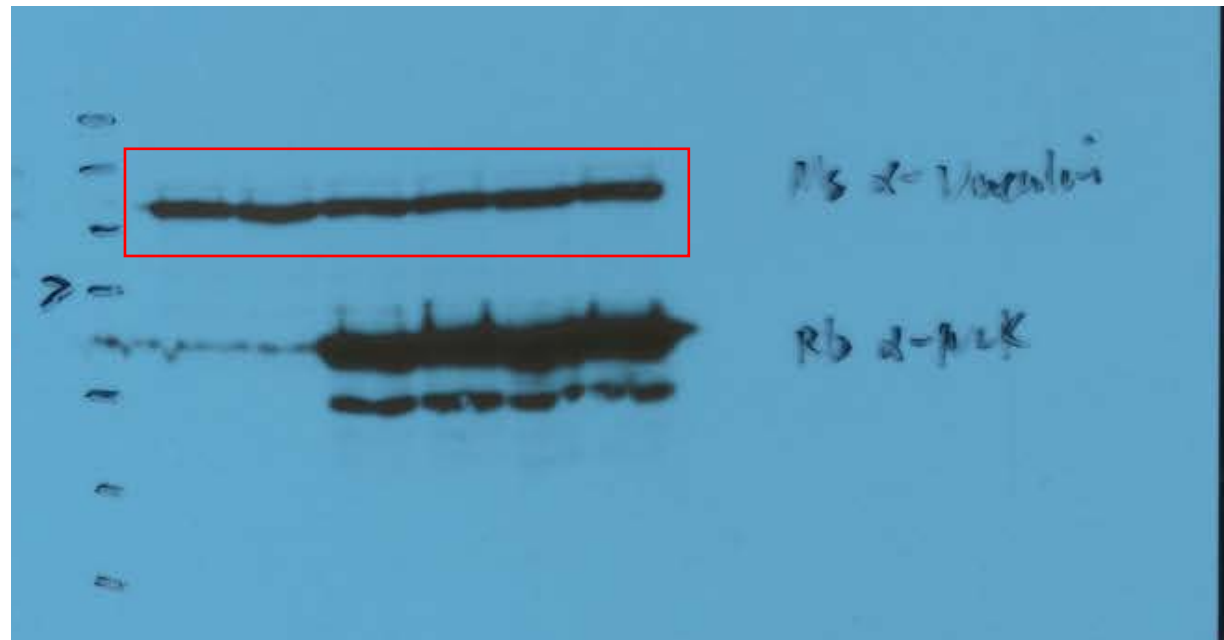

# Figure 2G- p-Tfeb (S122) cytosol

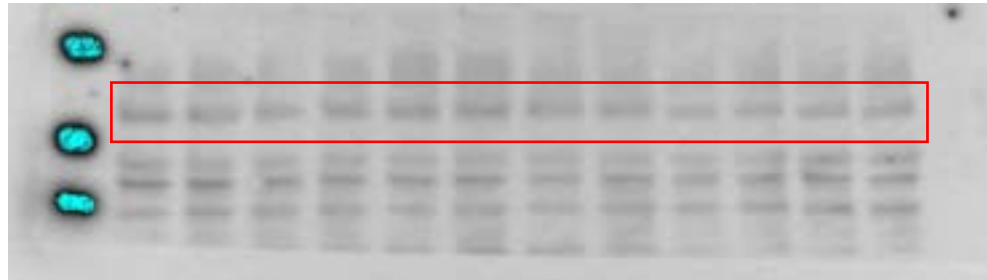



# Figure 2G- p-Tfeb (S122) nucleus

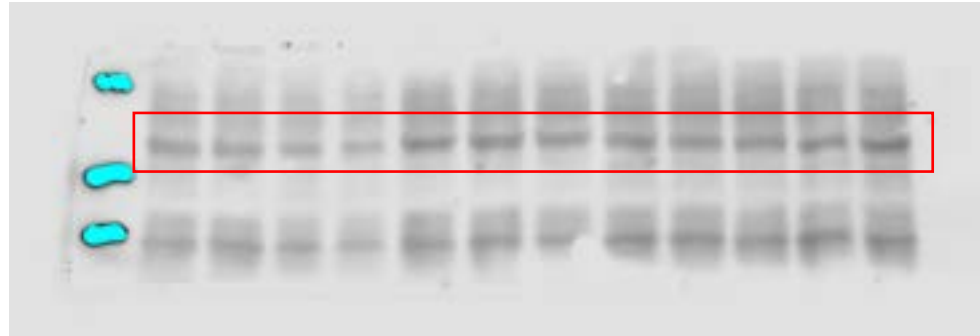

# Figure 2G- p-Tfeb (S142) cytosol

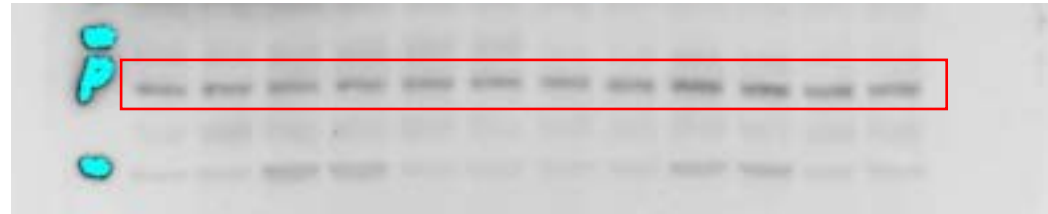

# Figure 2G- p-Tfeb (S142) nucleus

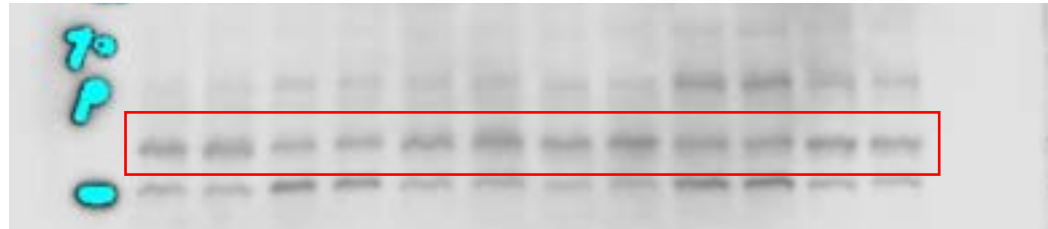

# Figure 2G- Tfeb cytosol

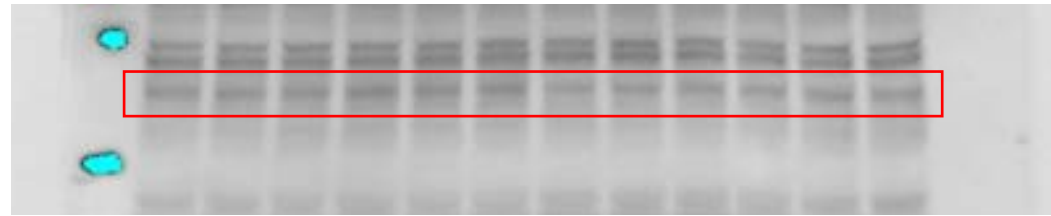

# Figure 2G- Tfeb nucleus

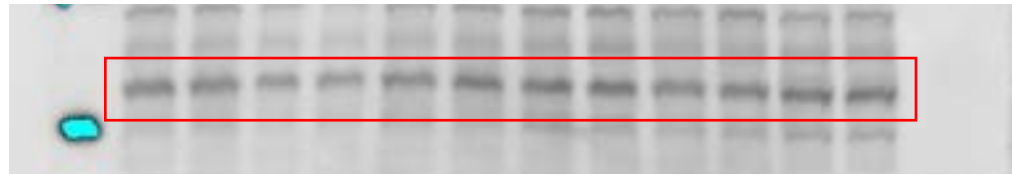

# Figure 2G- Flag cytosol

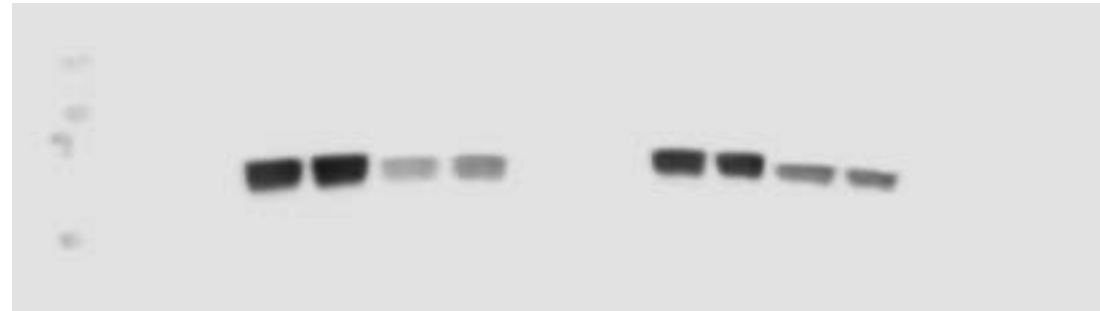

# Figure 2G- Flag nucleus

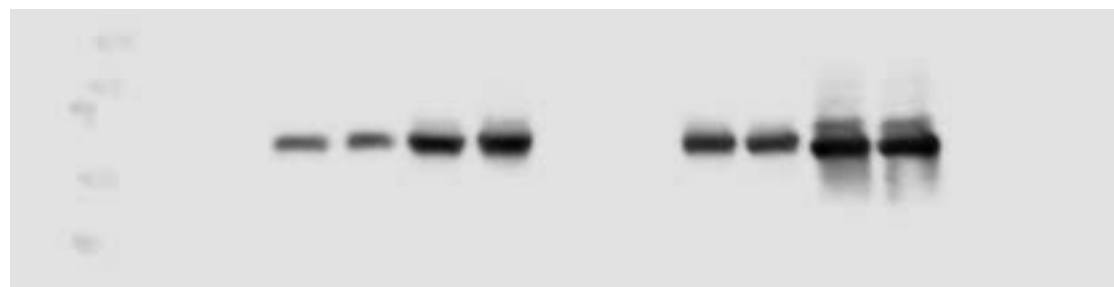

# Figure 2G- Vinculin cytosol

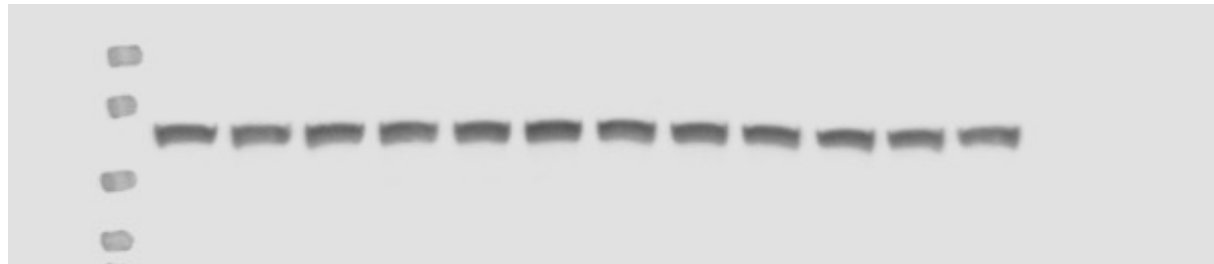



# Figure 2G- Vinculin nucleus

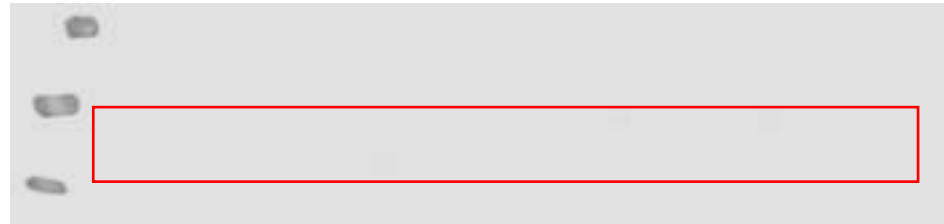

# Figure 2G- Histone H3 cytosol

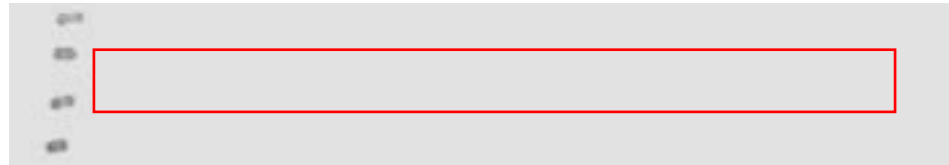

# Figure 2G- Histone H3 nucleus

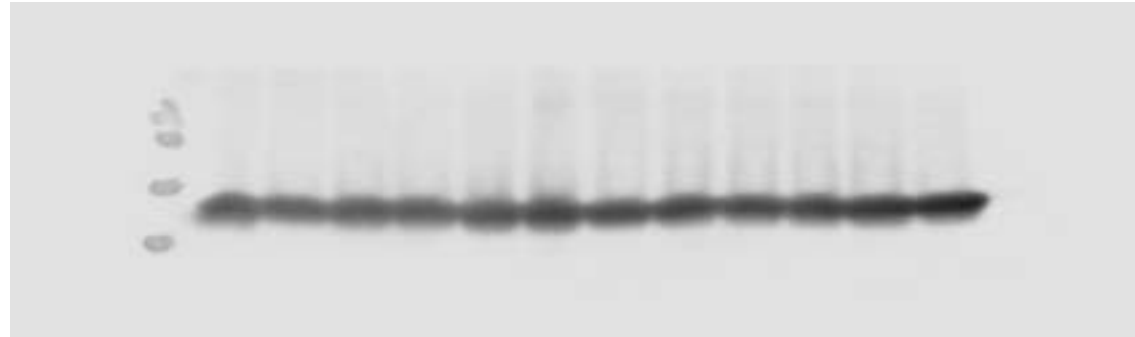

# Figure 3A- Vinculin

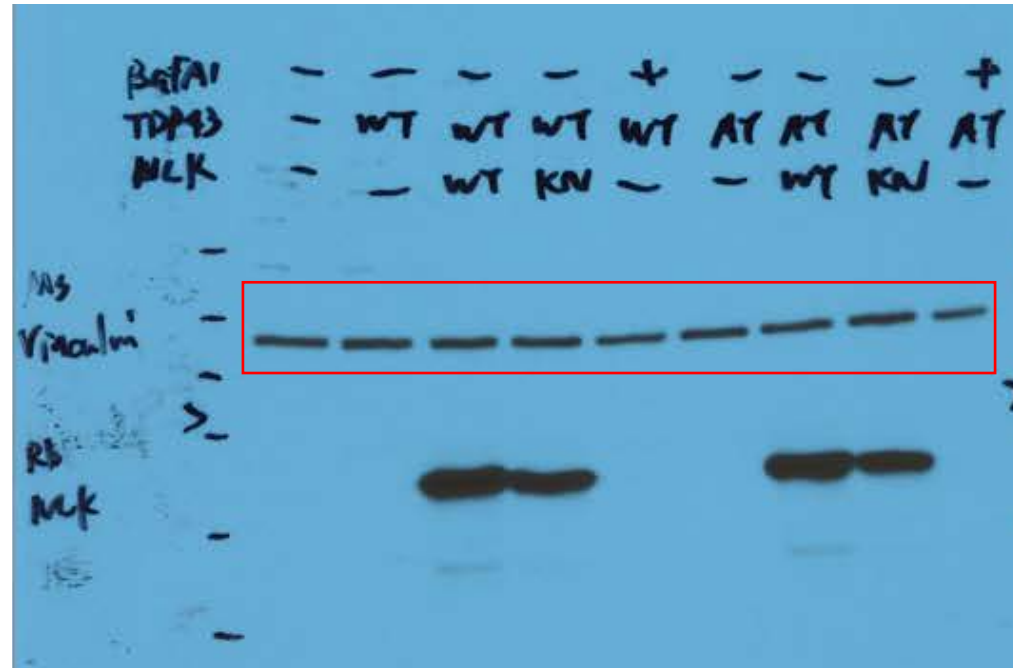

# Figure 3A- Nik

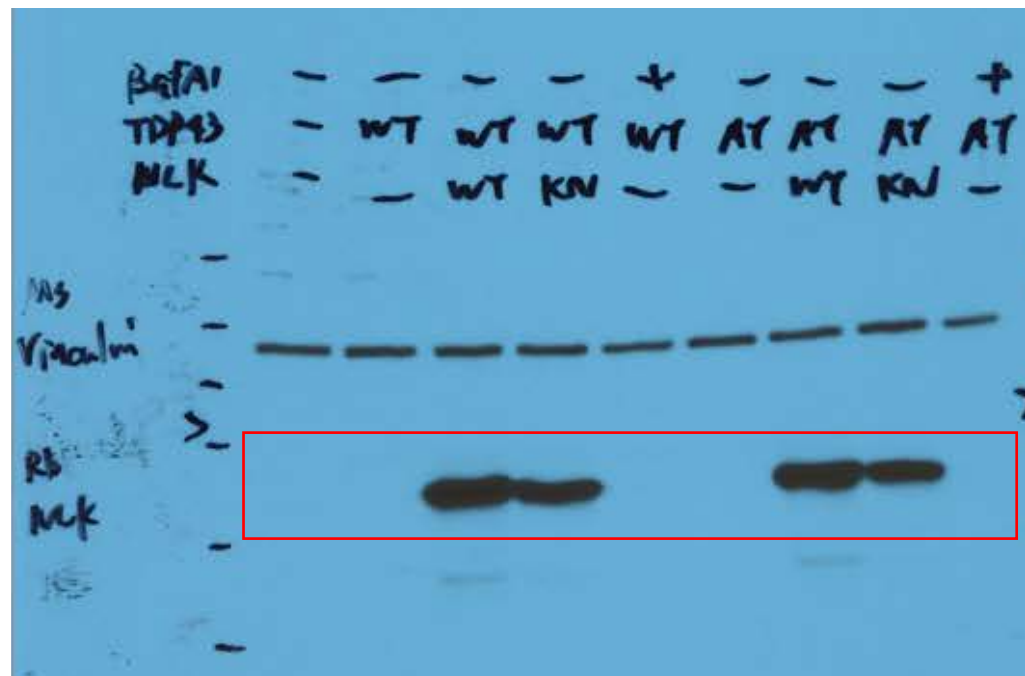

# Figure 3A- Total TDP-43 (low exposure)

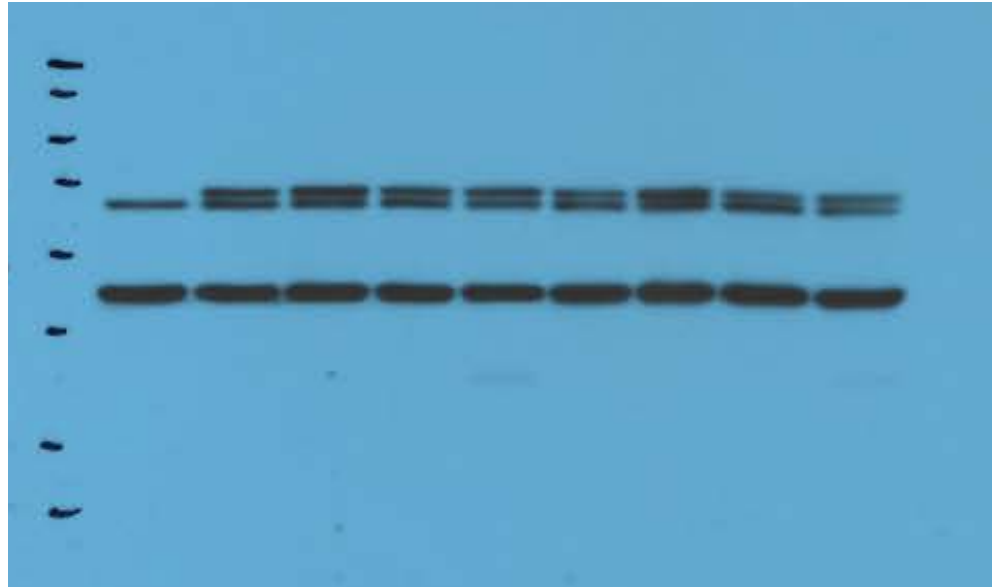

# Figure 3A- Total TDP-43 (high exposure)

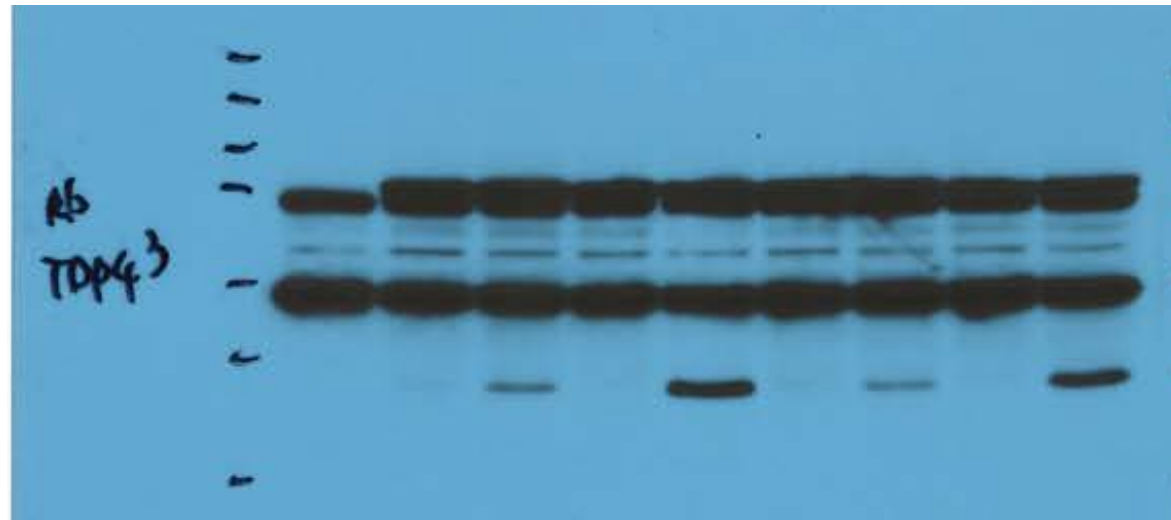

# Figure 3C- Vinculin cytoplasm (LS)

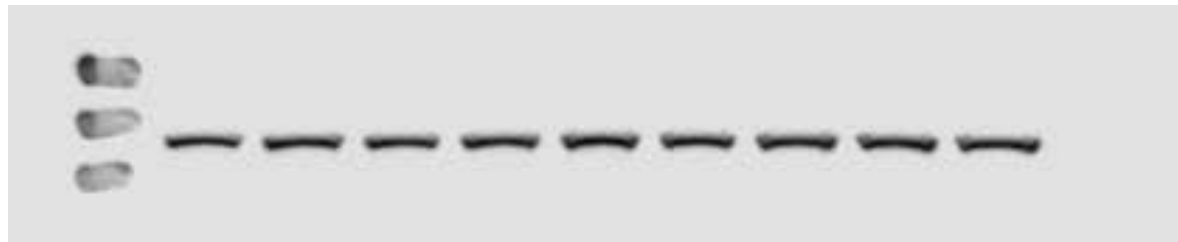



# Figure 3C- Vinculin nucleus (LS)

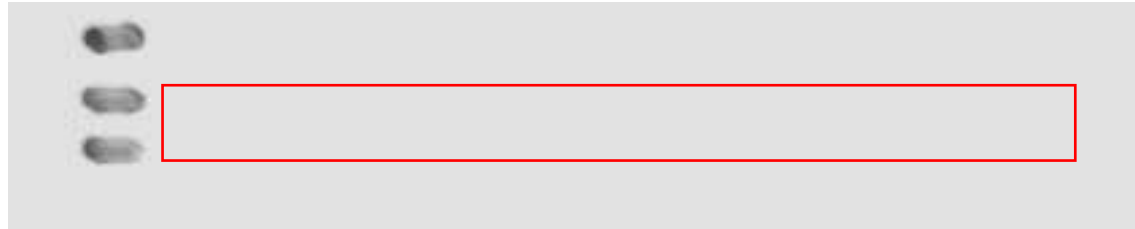

# Figure 3C- Histone H3 cytoplasm (LS)

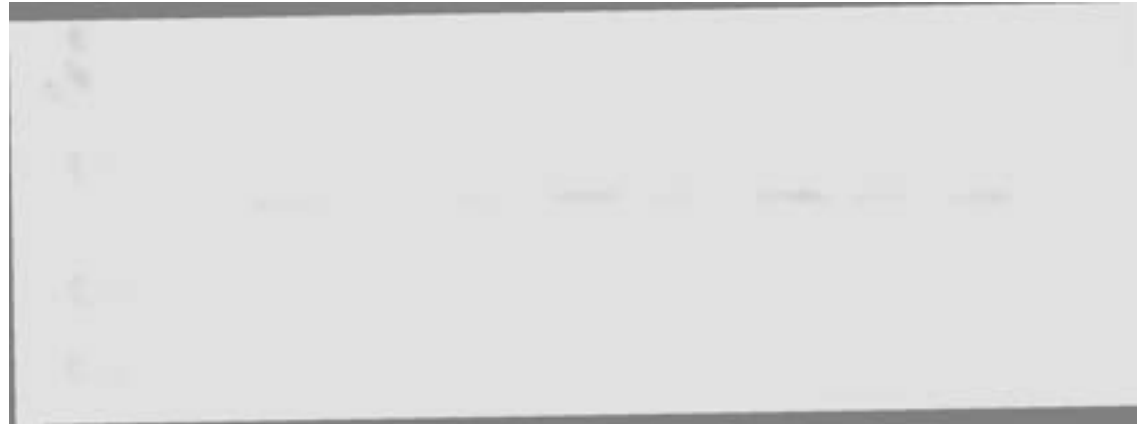

# Figure 3C- Histone H3 nucleus (LS)

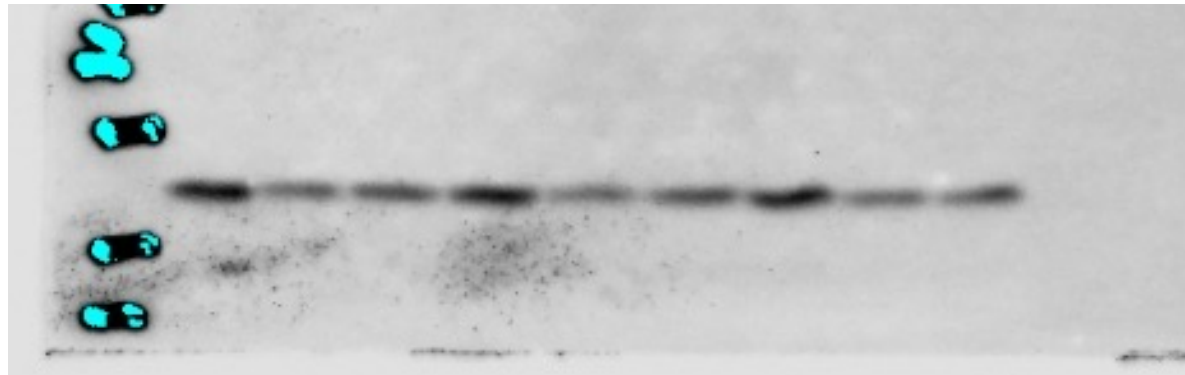

# Figure 3C- Flag cytoplasm (LS)

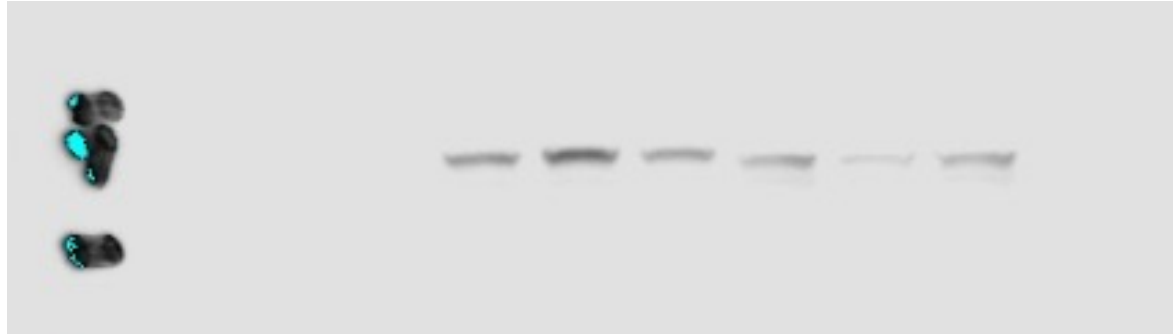

# Figure 3C- Flag nucleus (LS)

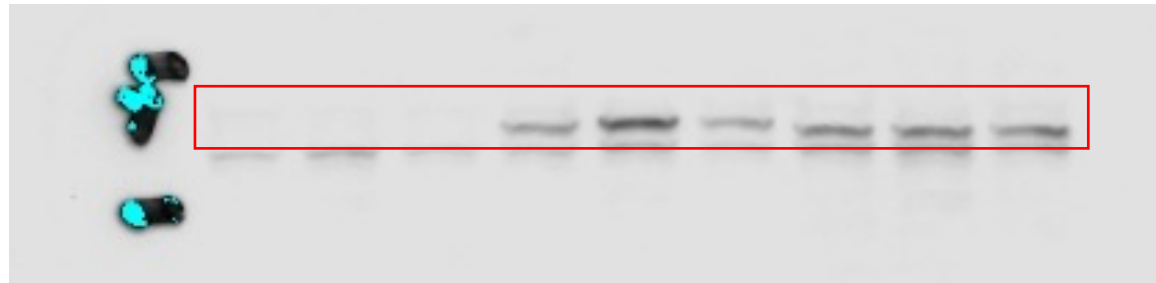

# Figure 3C- hTDP-43 cytoplasm (LS)

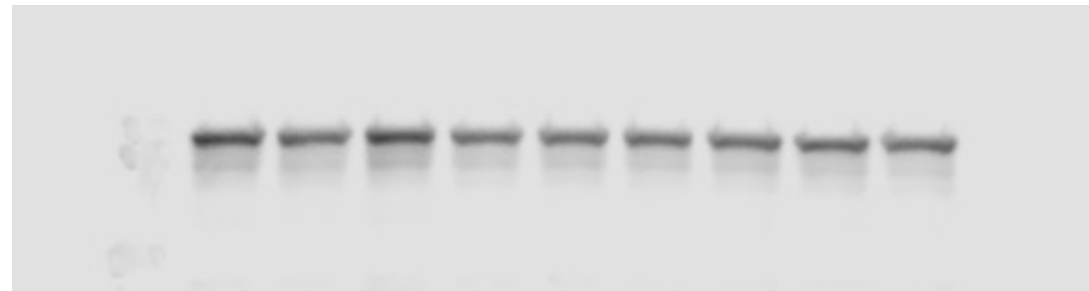

# Figure 3C- hTDP-43 nucleus (LS)

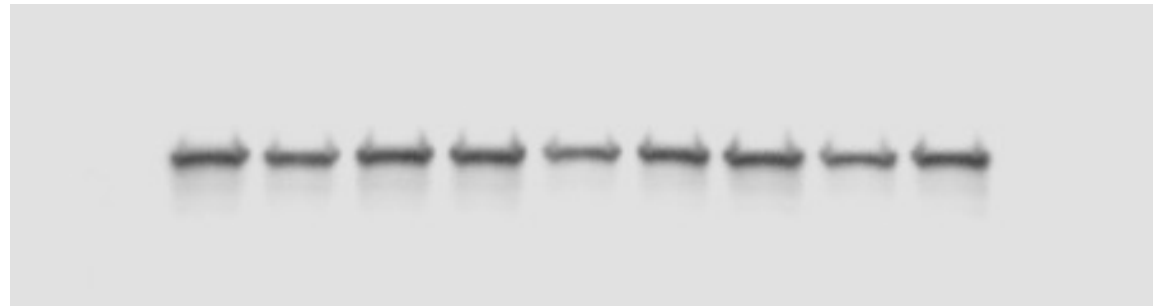

# Figure 3C- hTDP-43 cytoplasm (SK)

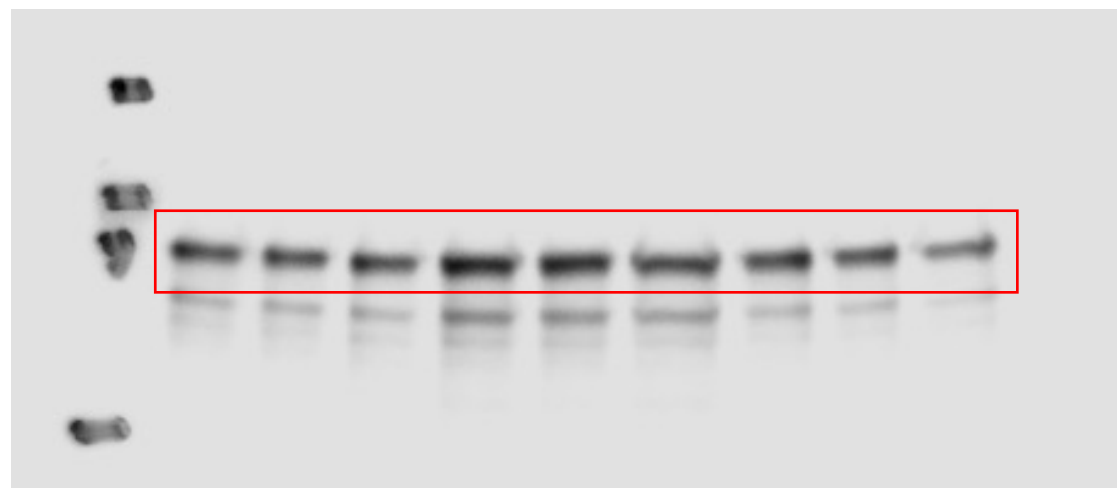



# Figure 3C- hTDP-43 nucleus (SK)

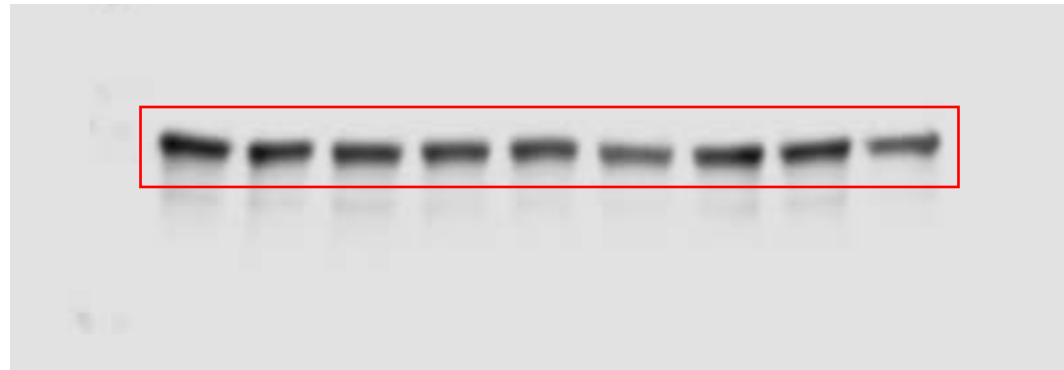

# Figure 3C- hTDP-43 cytoplasm (UR)

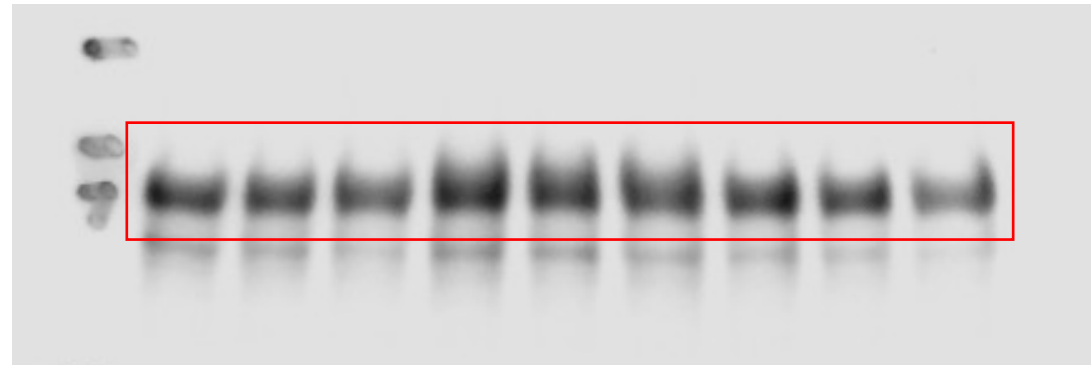

# Figure 3C- hTDP-43 nucleus (UR)

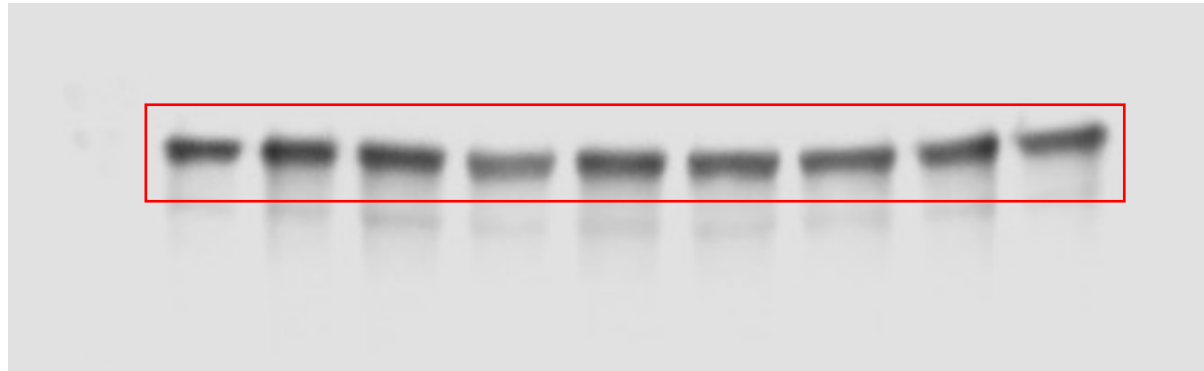

# Figure 3G- Total TDP-43 (low exposure)

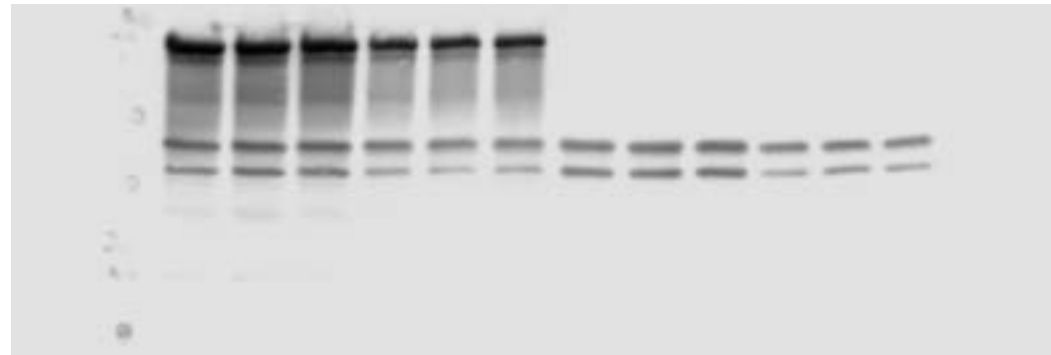

# Figure 3G- Total TDP-43 (high exposure)

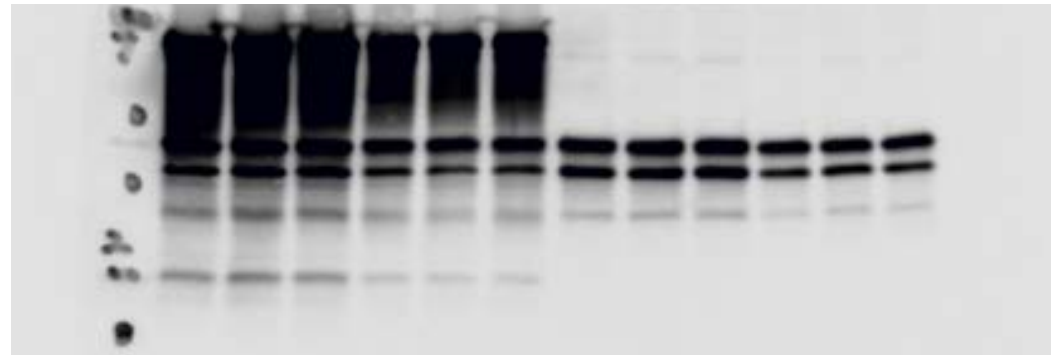

# Figure 3G- Nlk

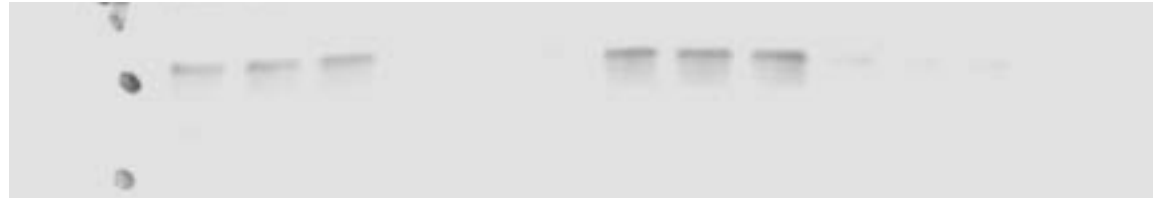

# Figure 3G- Vinculin

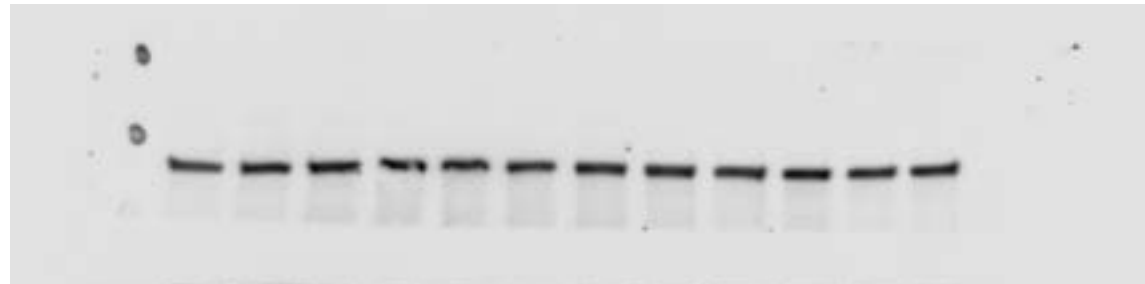

# Figure 4G- Vinculin (LS)

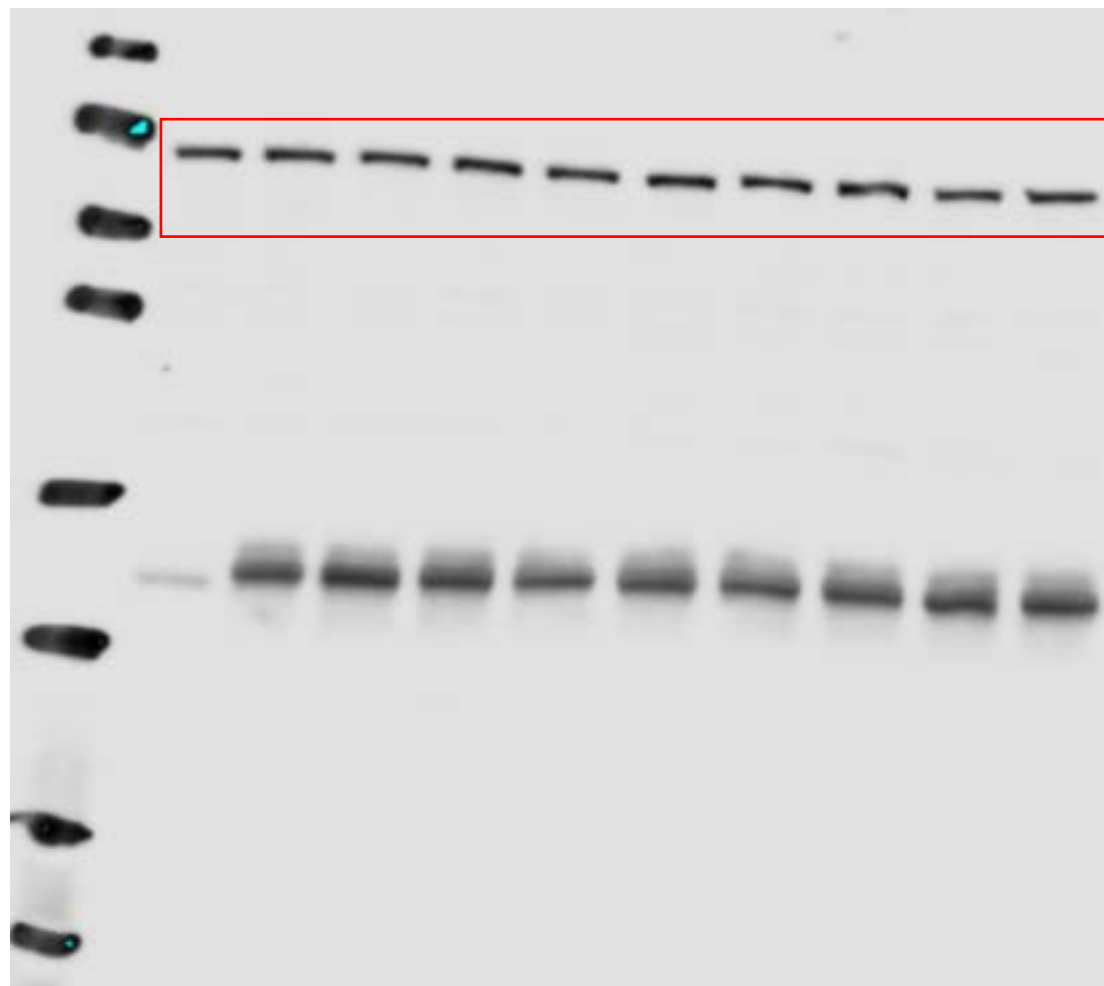



# Figure 4G- TDP-43 (LS)

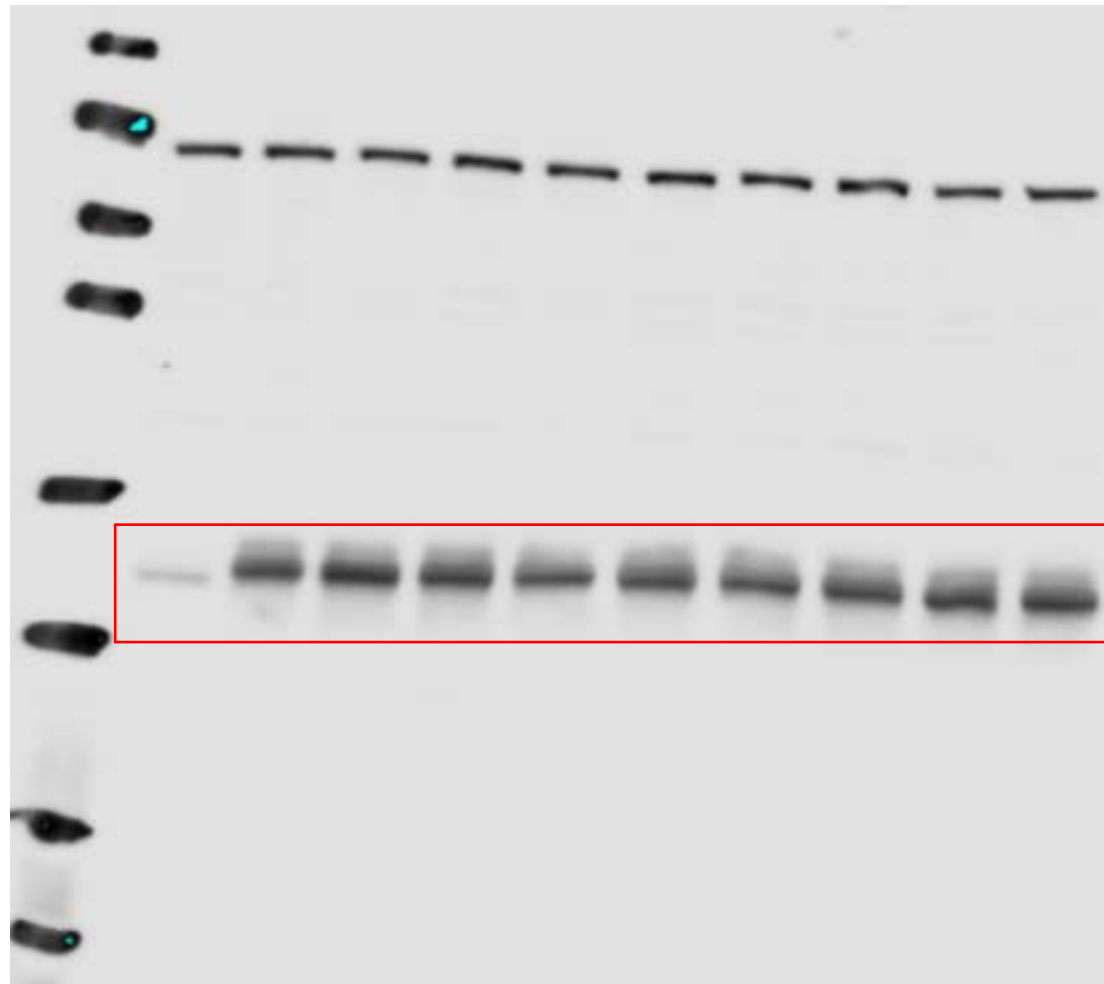

# Figure 4G- NIK (LS)

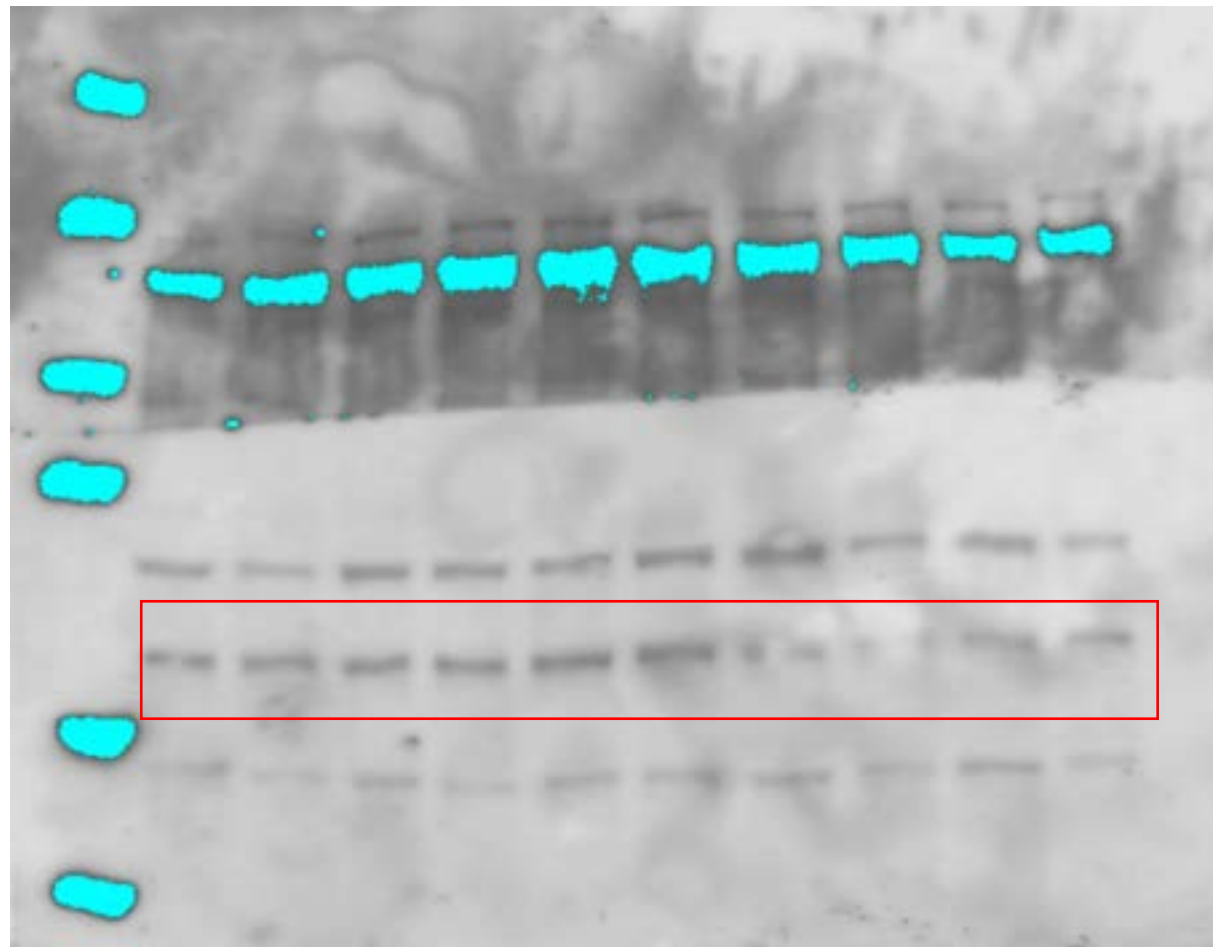

# Figure 4G- Flag (LS)

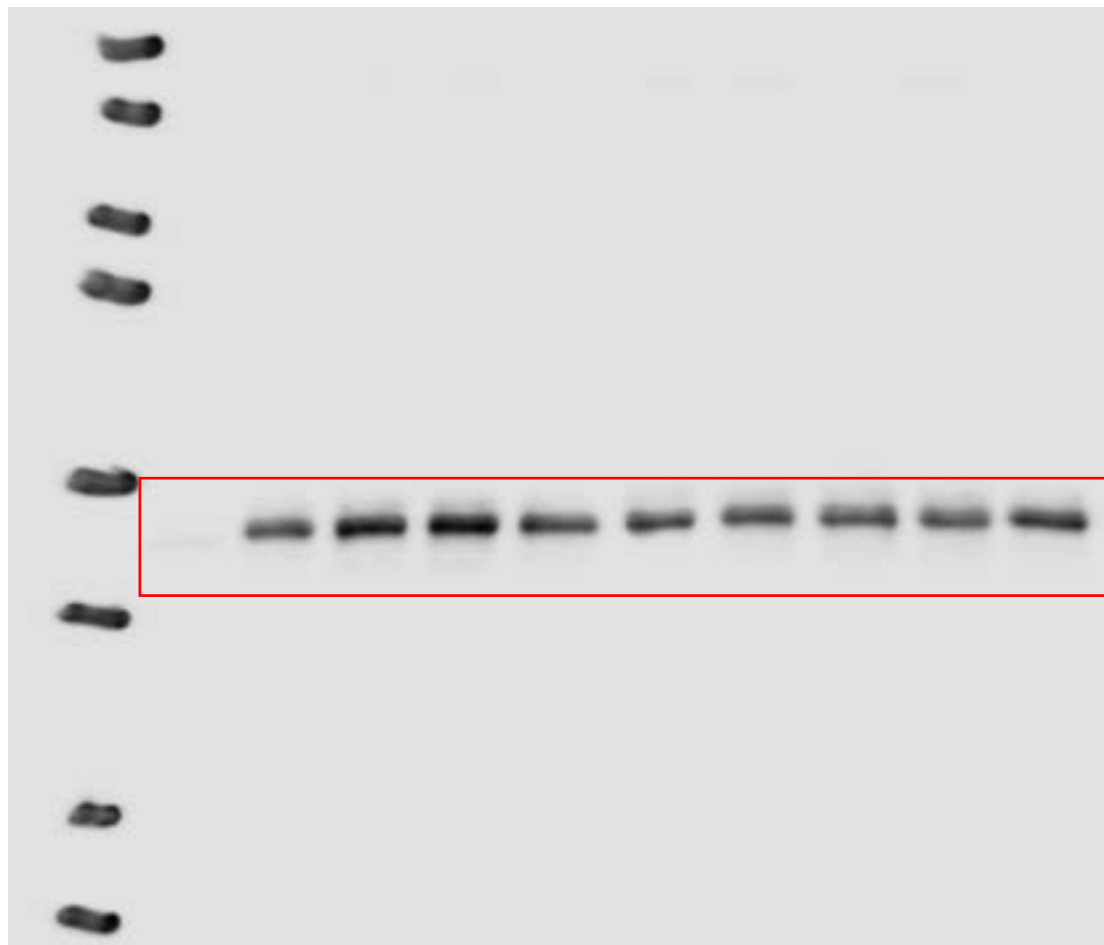

# Figure 4G- TDP-43 (HS)

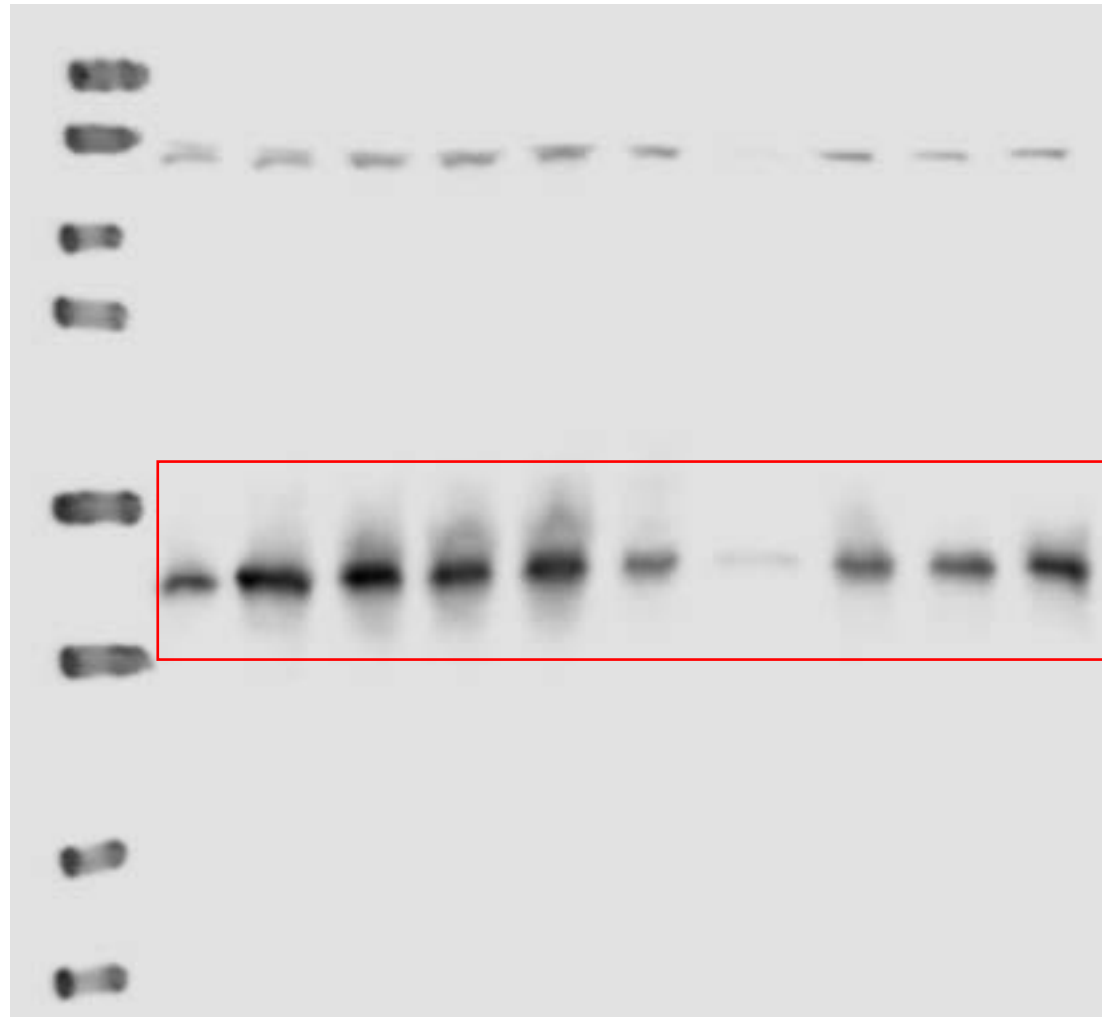

# Figure 4G- Flag (HS)

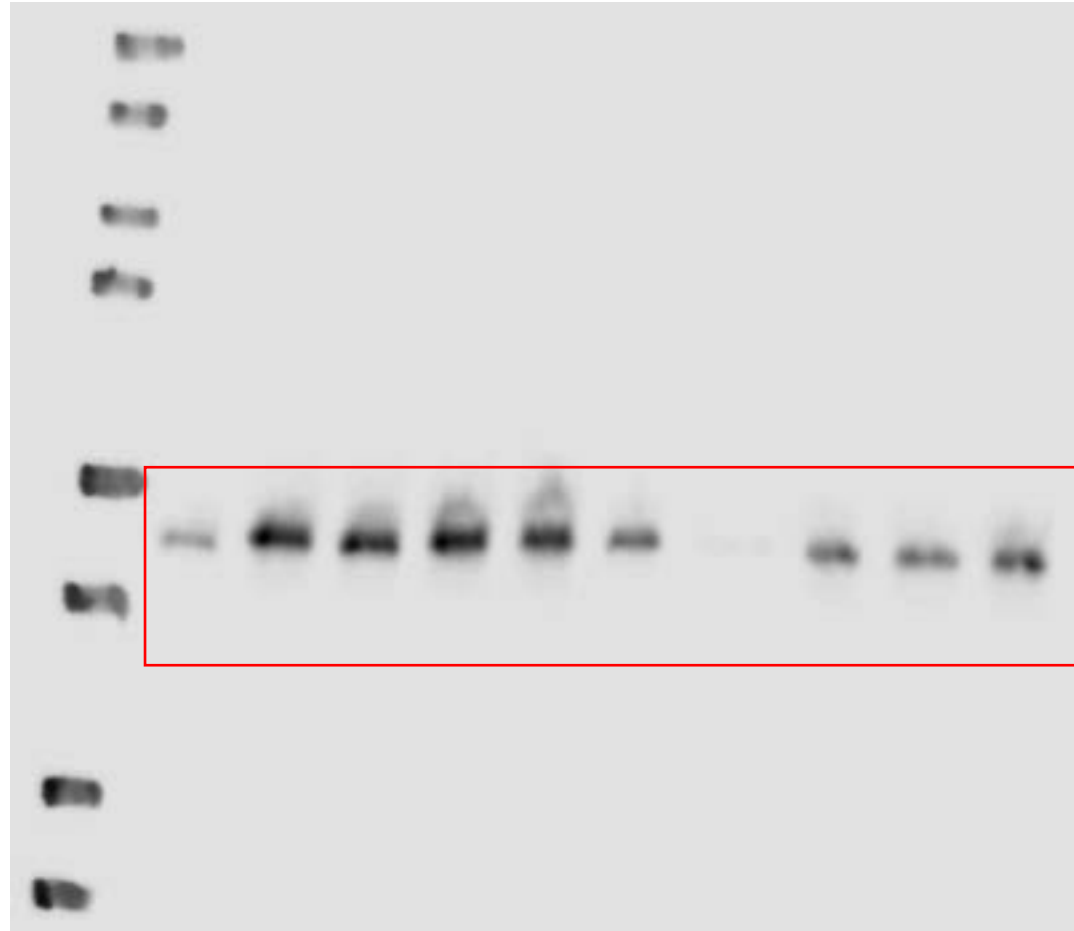

# Figure 4G- TDP-43 (SK)

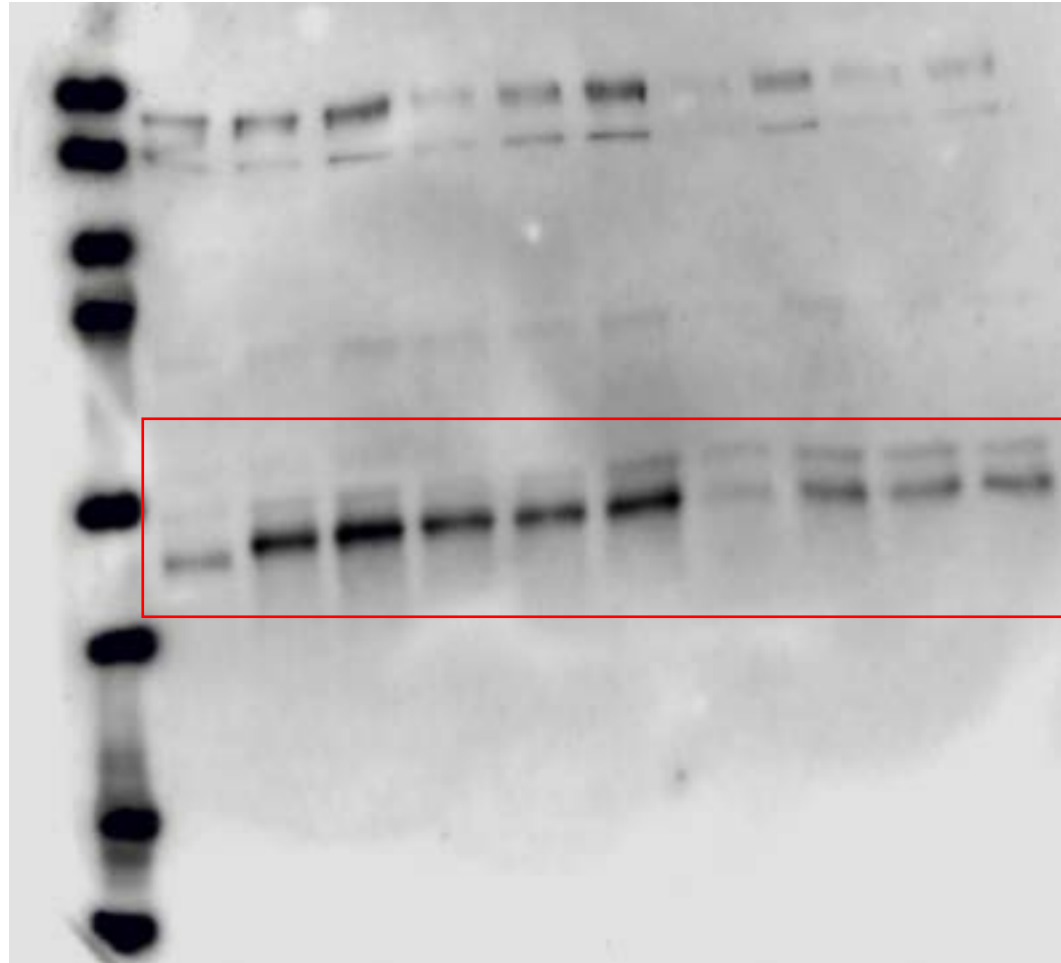

# Figure 4G- Flag (SK)

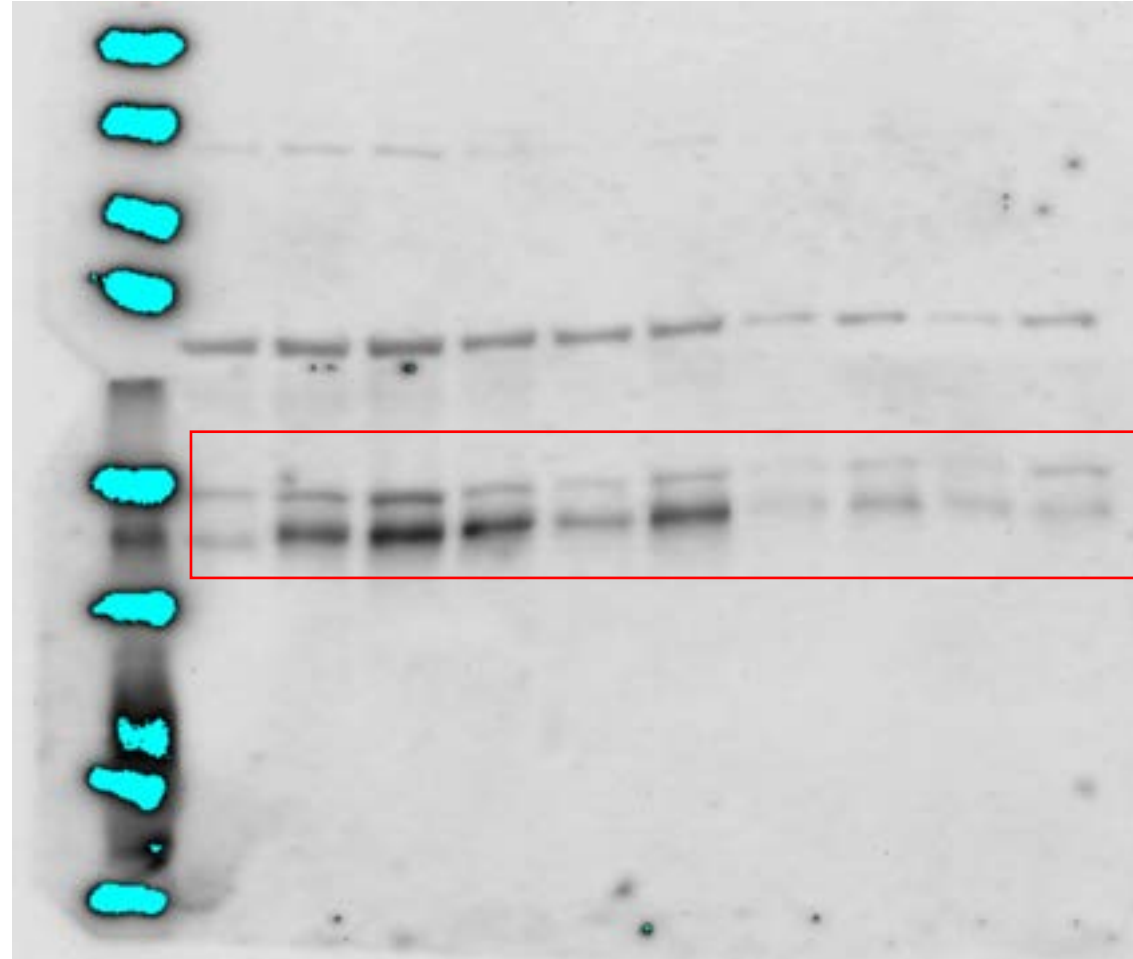

# Figure 4G- TDP-43 (UR)

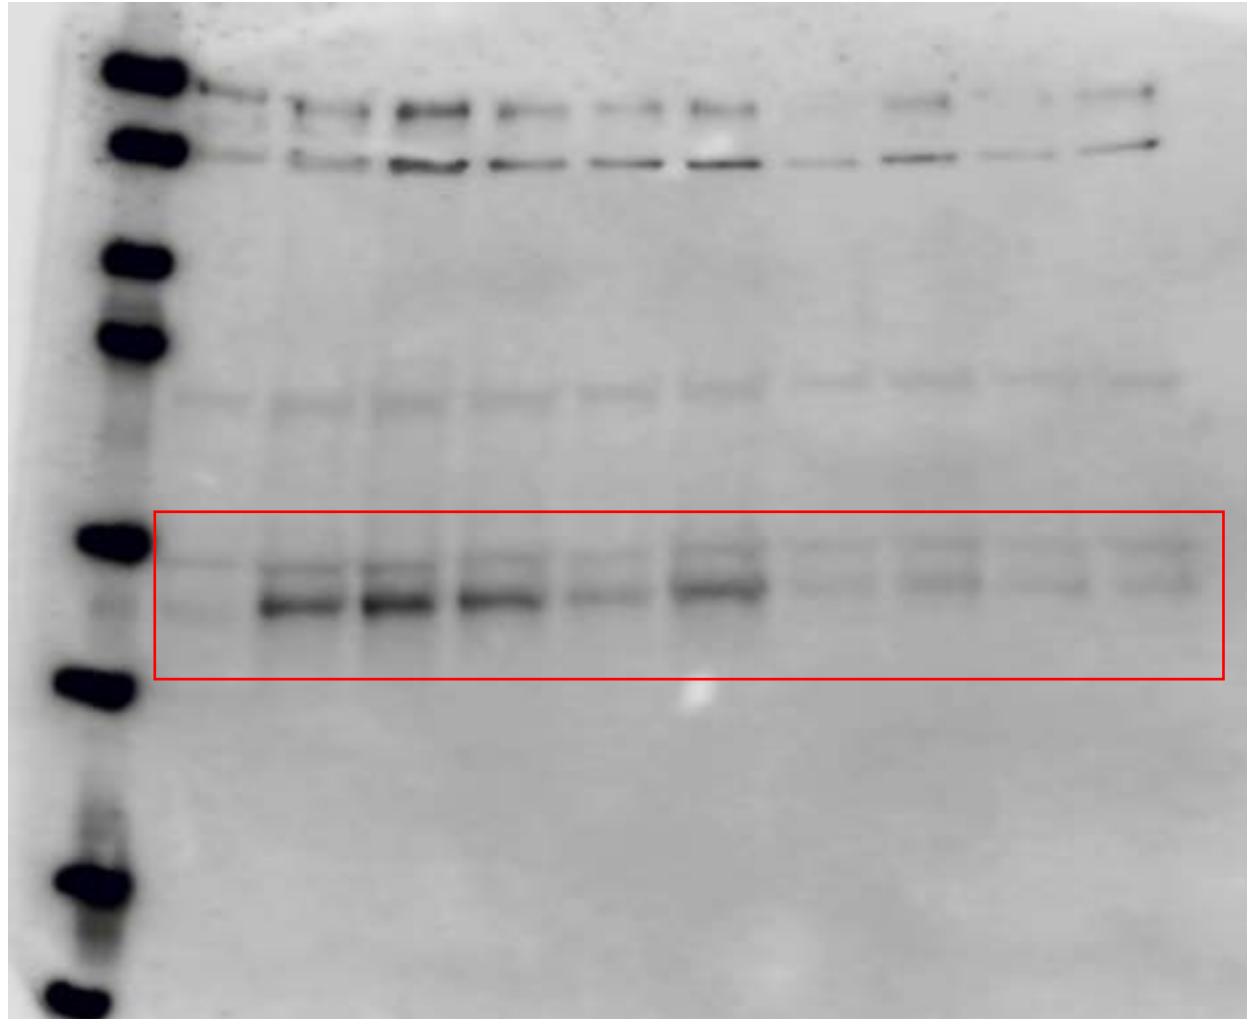



# Figure 6I- Vinculin (LS)

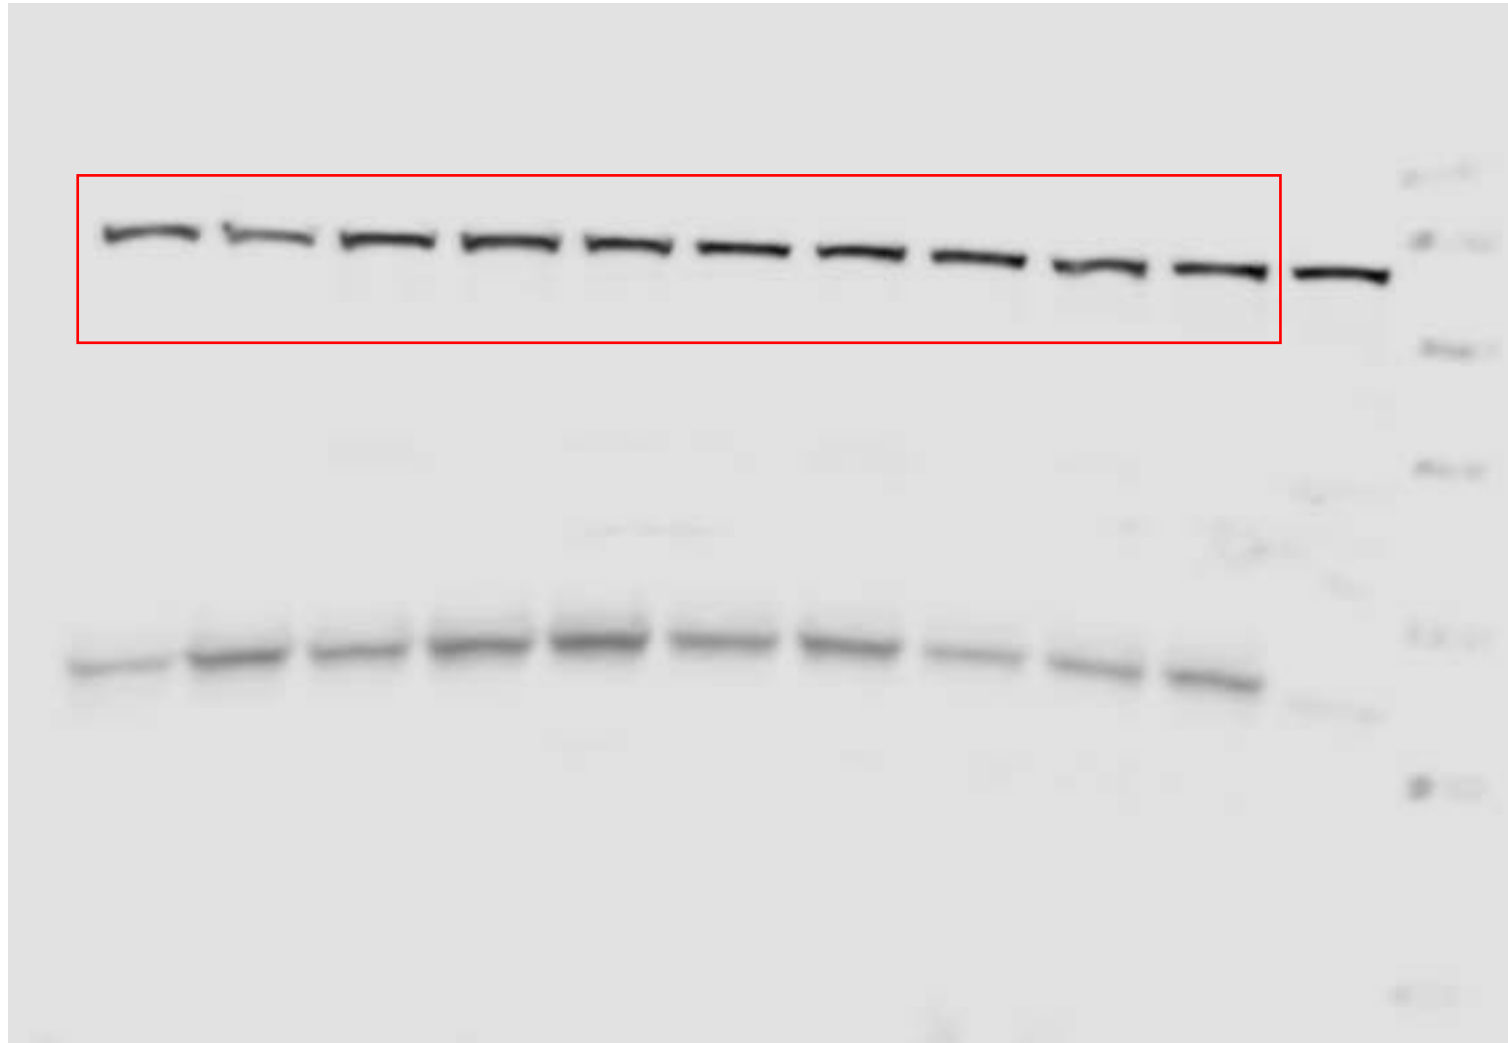

Figure 6I- TDP-43 (LS)

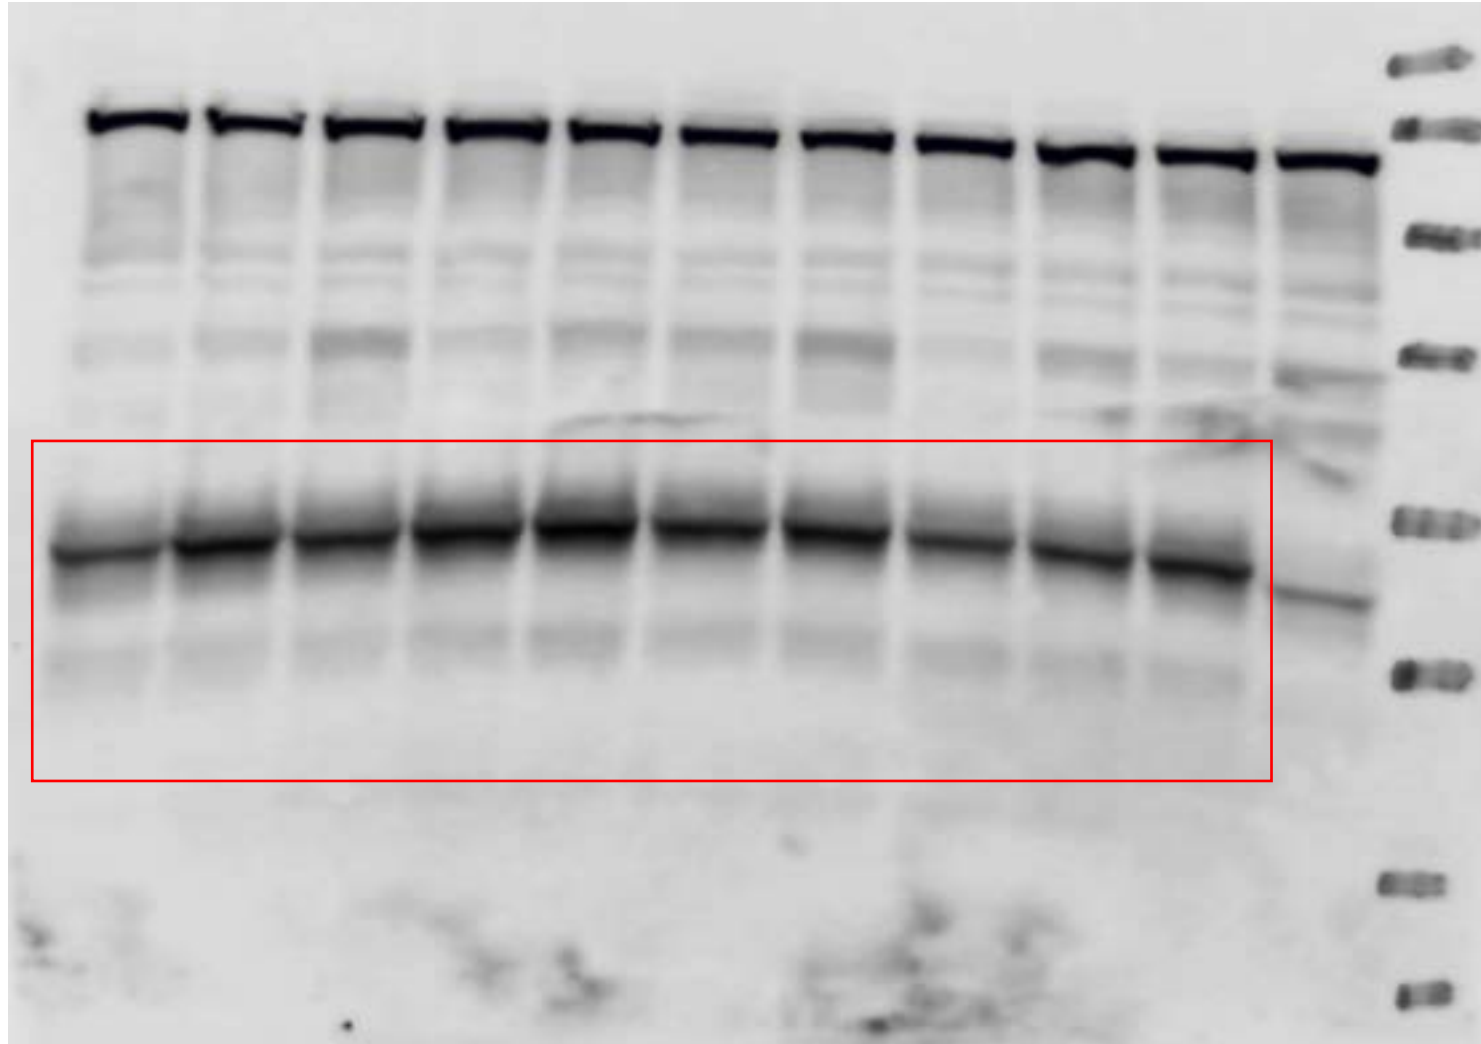

Figure 6I- Flag (LS)

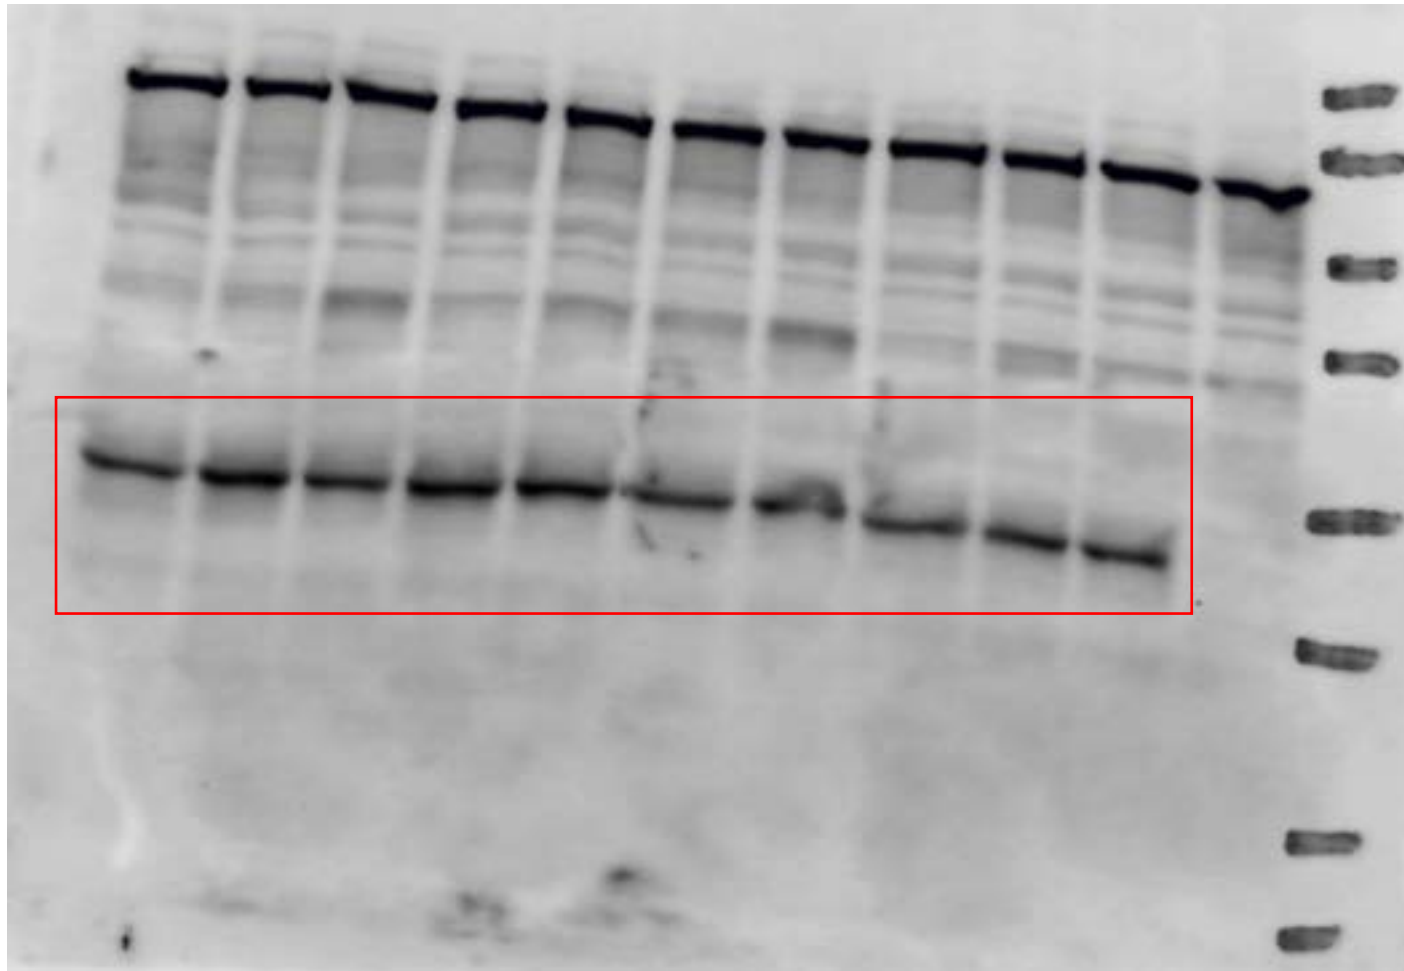

# Figure 6I- TDP-43 (SK)

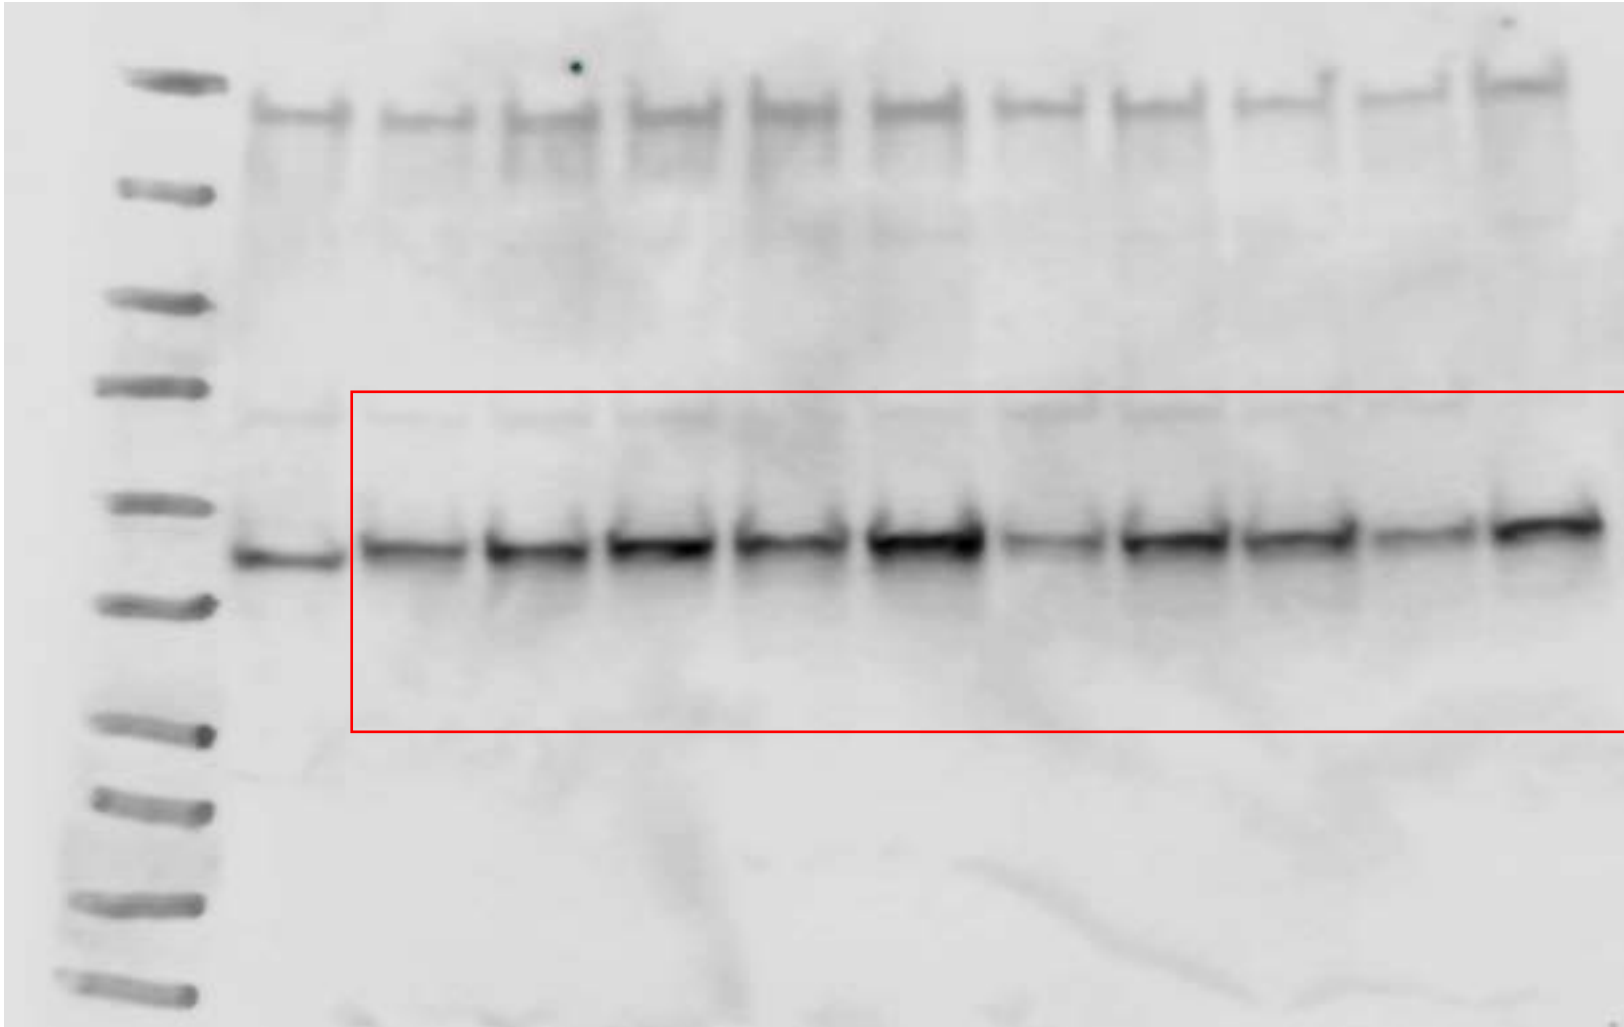

# Figure 6I- TDP-43 (Urea+SDS)

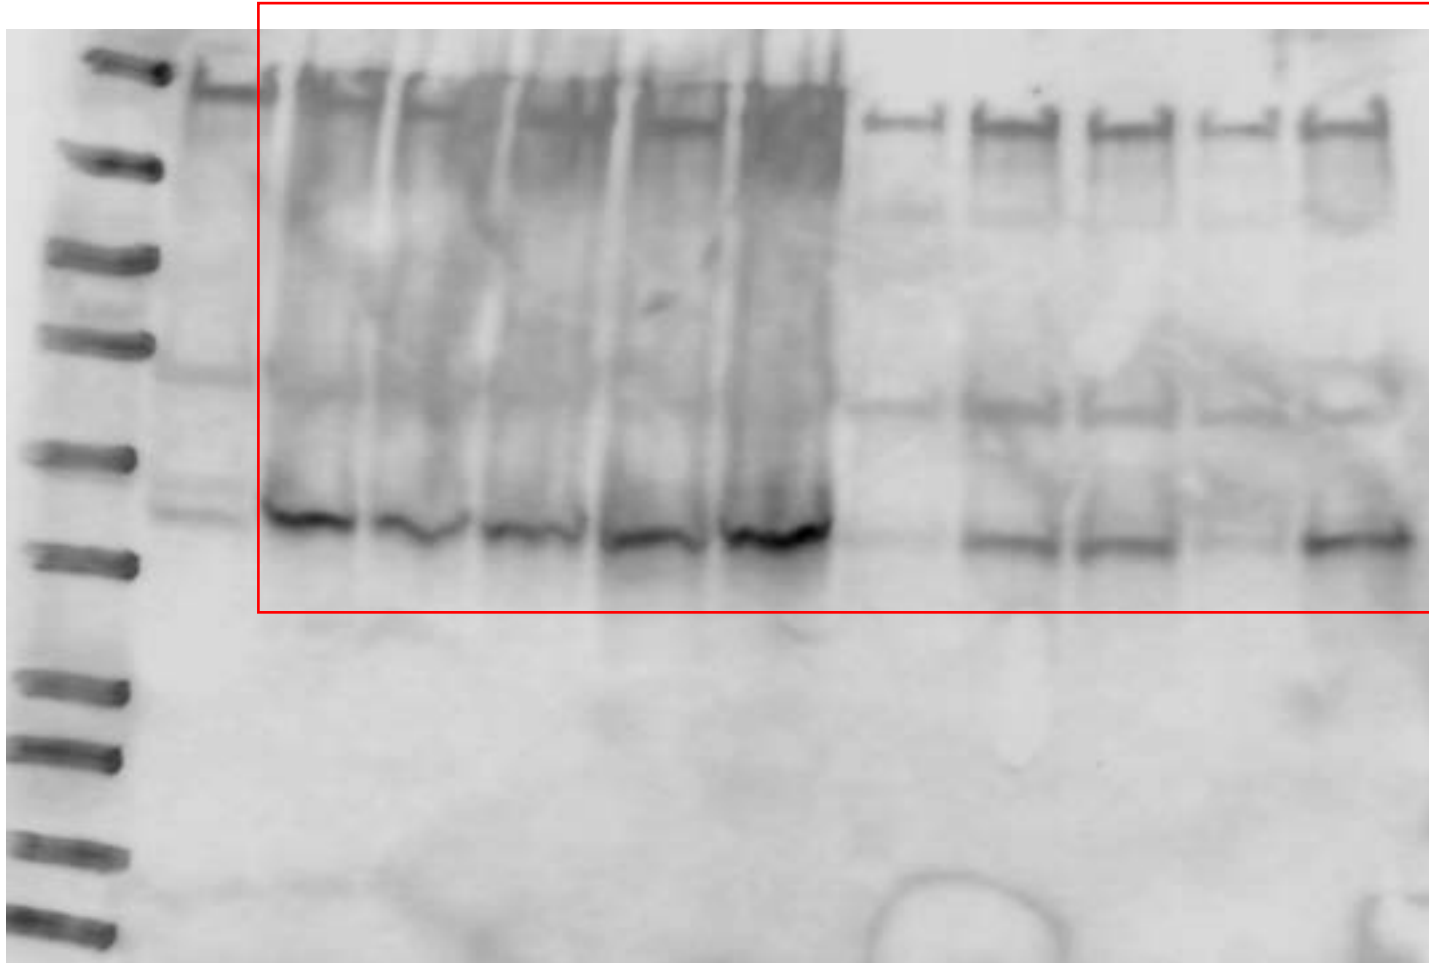

# Figure S1- Nik

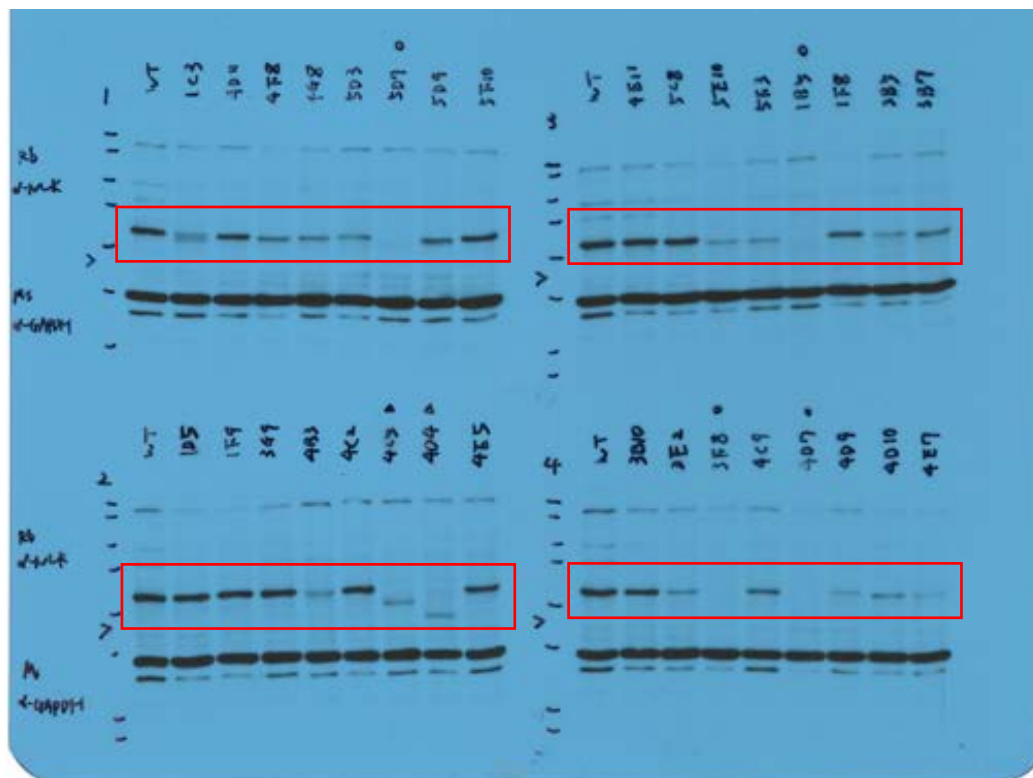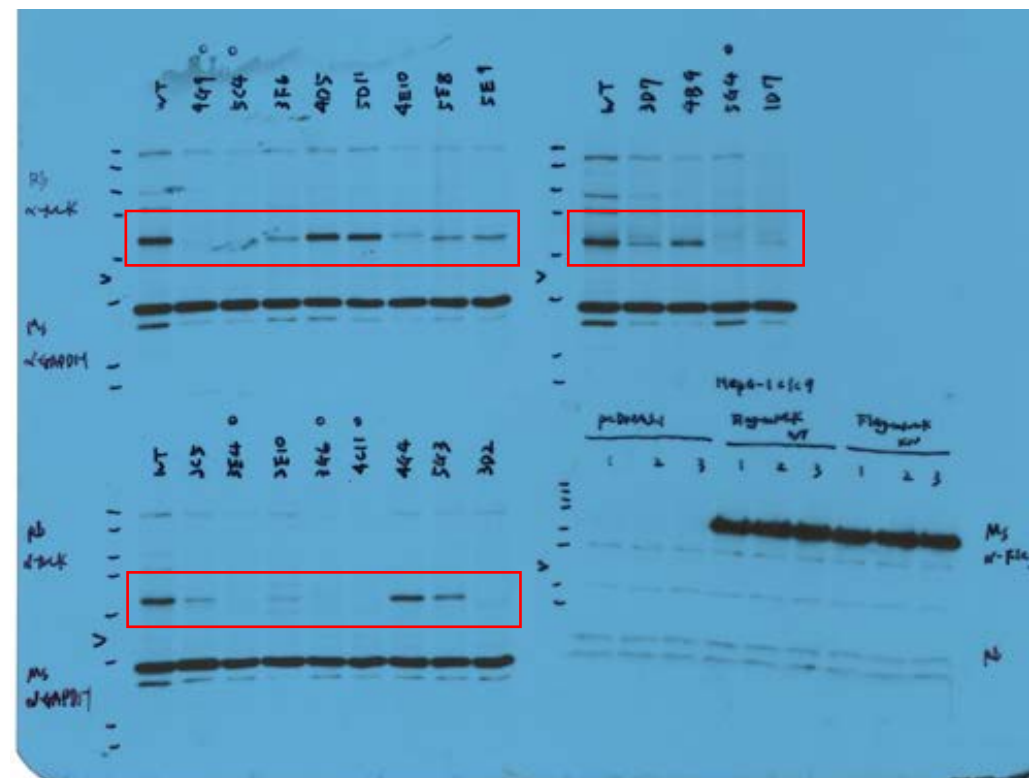

# Figure S1- Gapdh

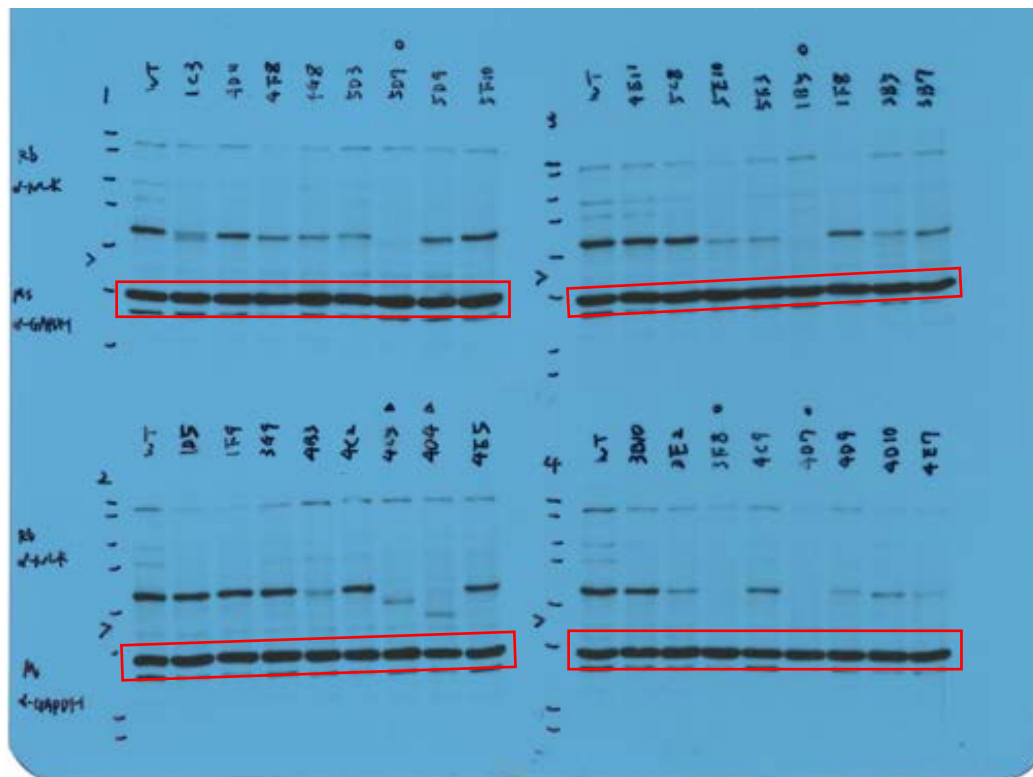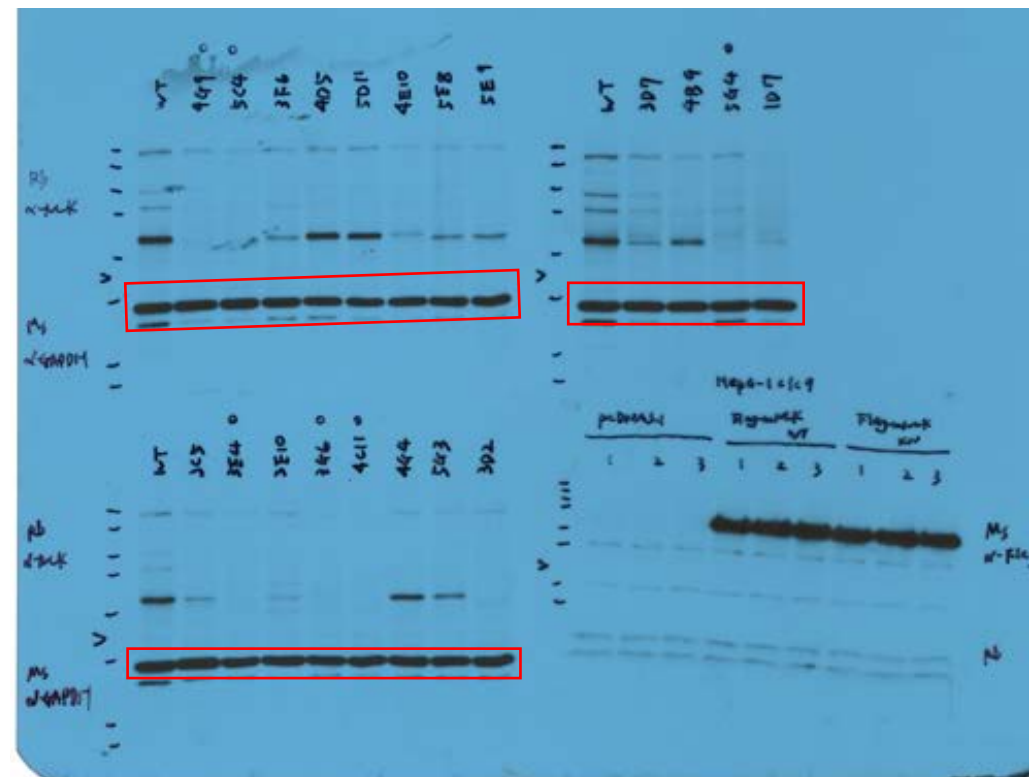

# Figure S3I- p62

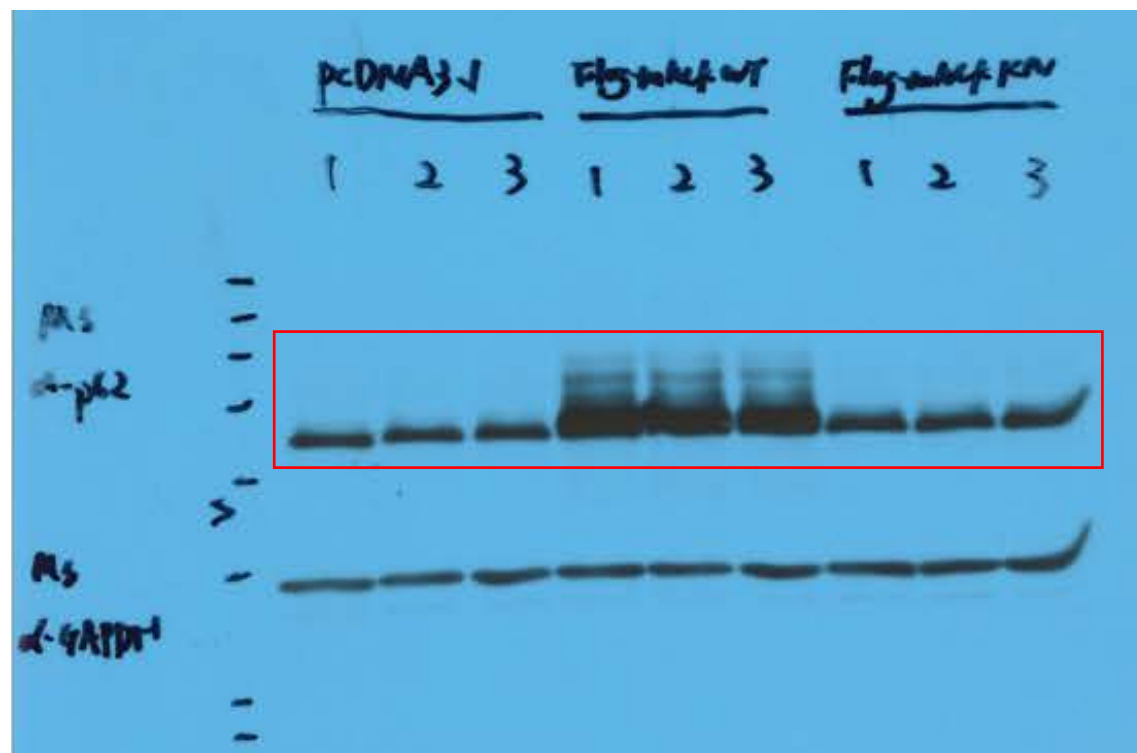



# Figure S3I- LC3

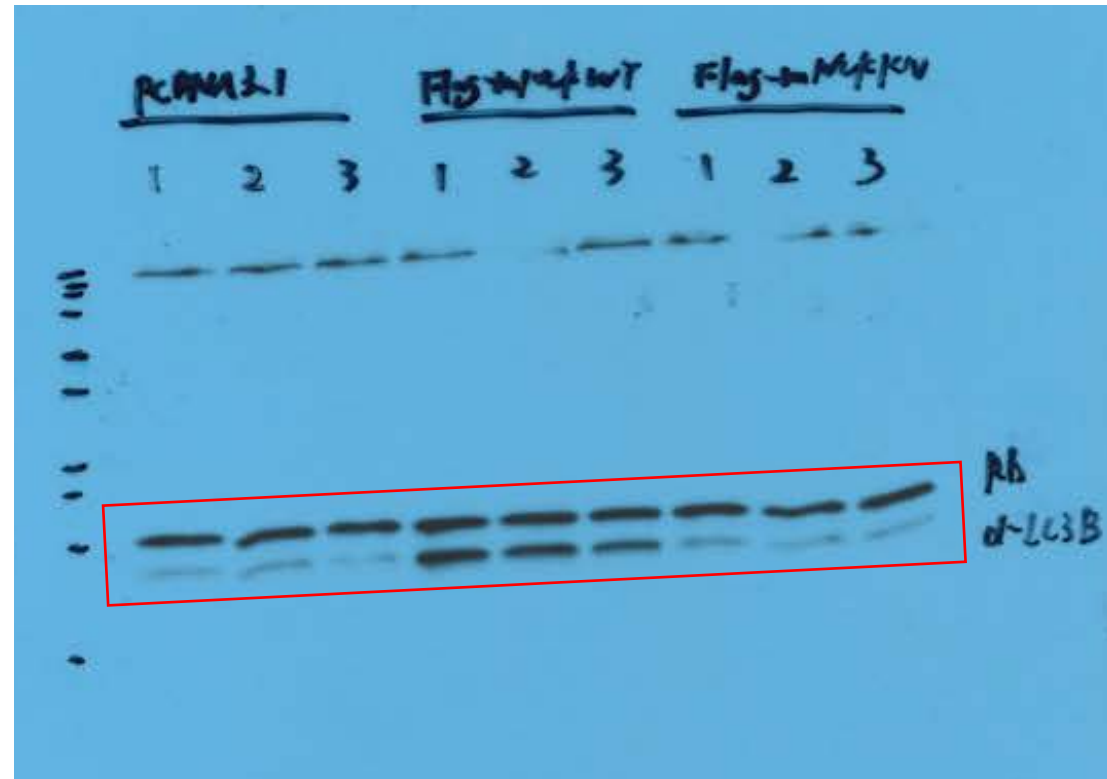

# Figure S3I- Flag (Nik)

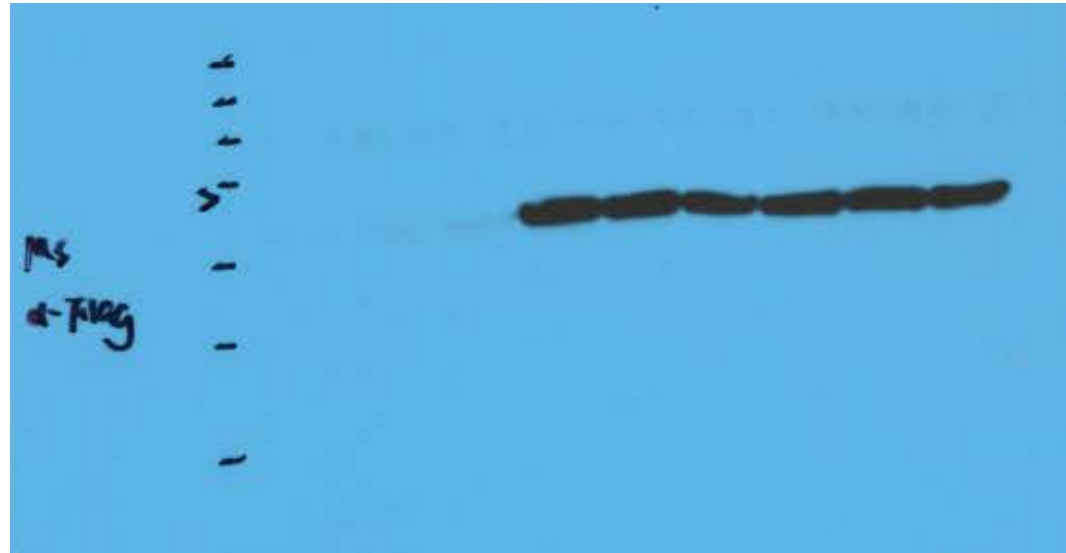

# Figure S3I- Gapdh

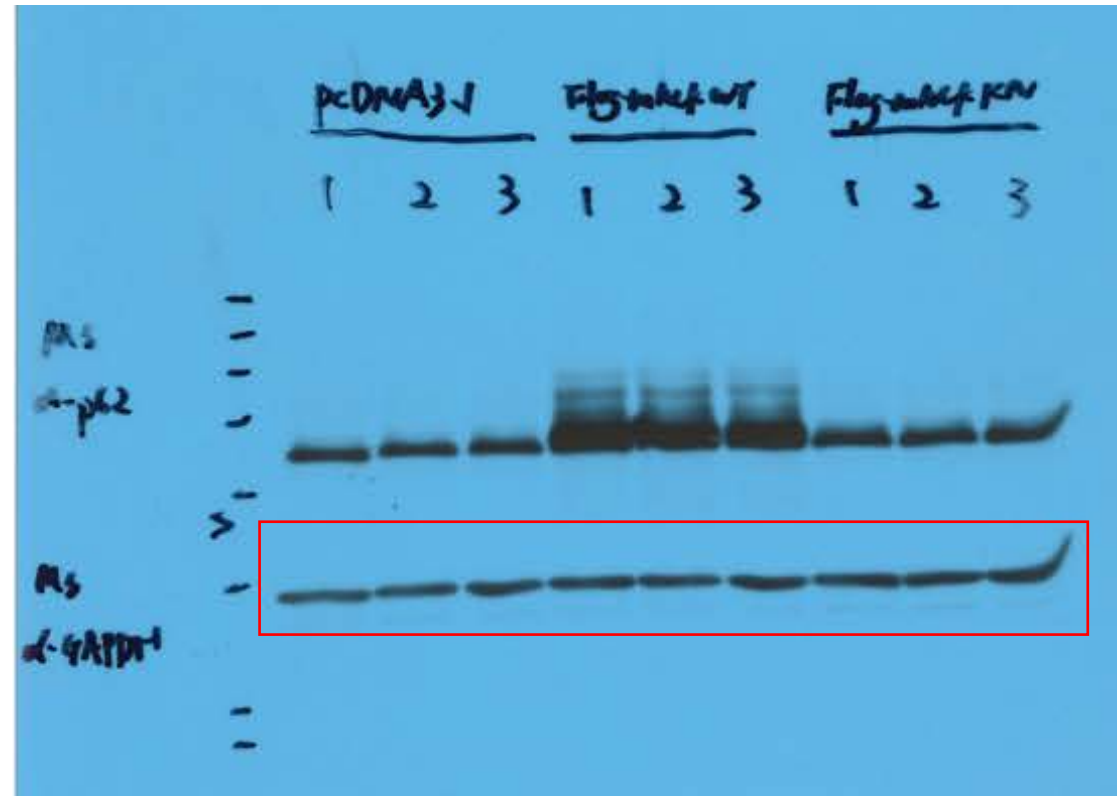

# Figure S3J- GFP

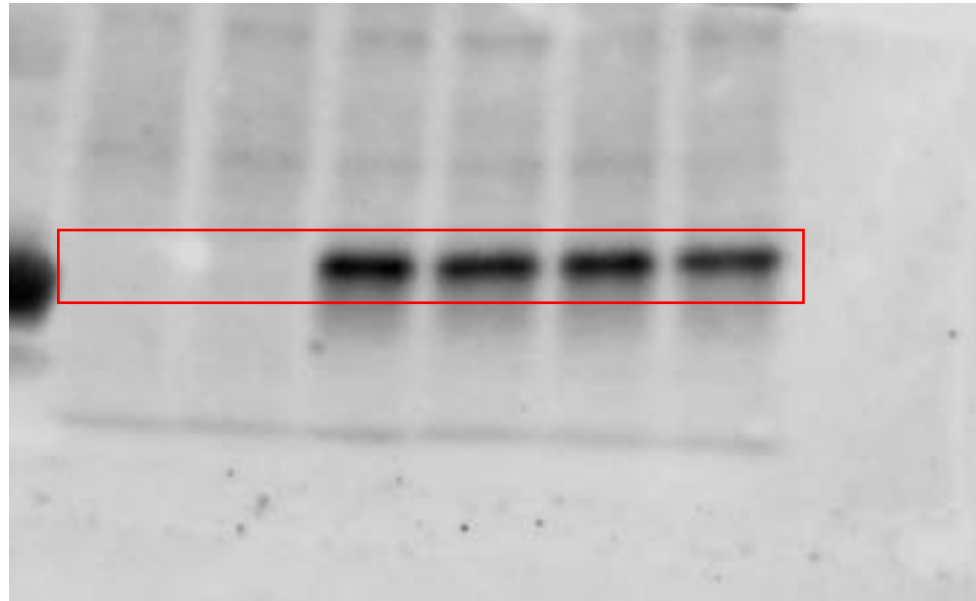

# Figure S3J- Flag

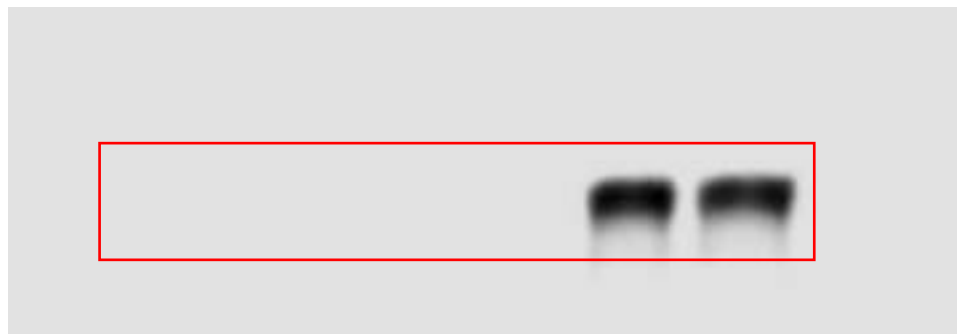

# Figure S3J- Vinculin

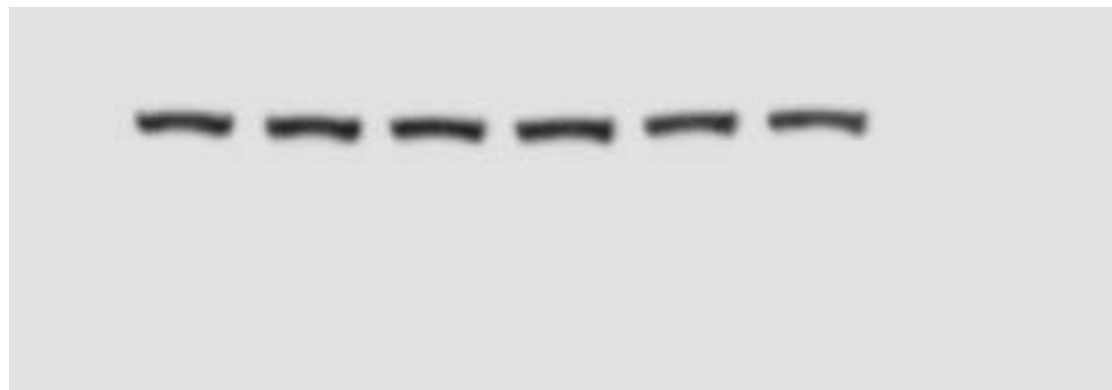

# Figure S3K- Flag (Nik)

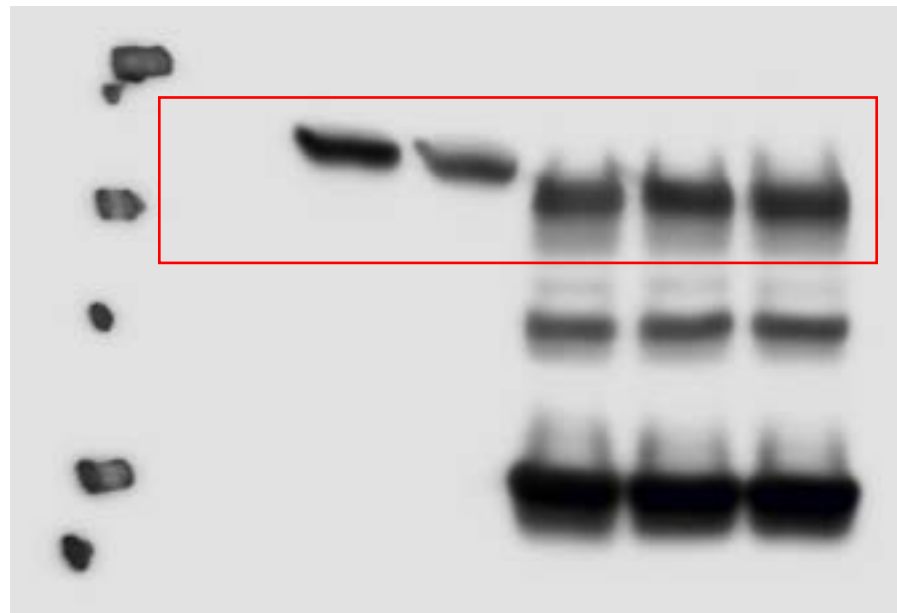

# Figure S3K- HA

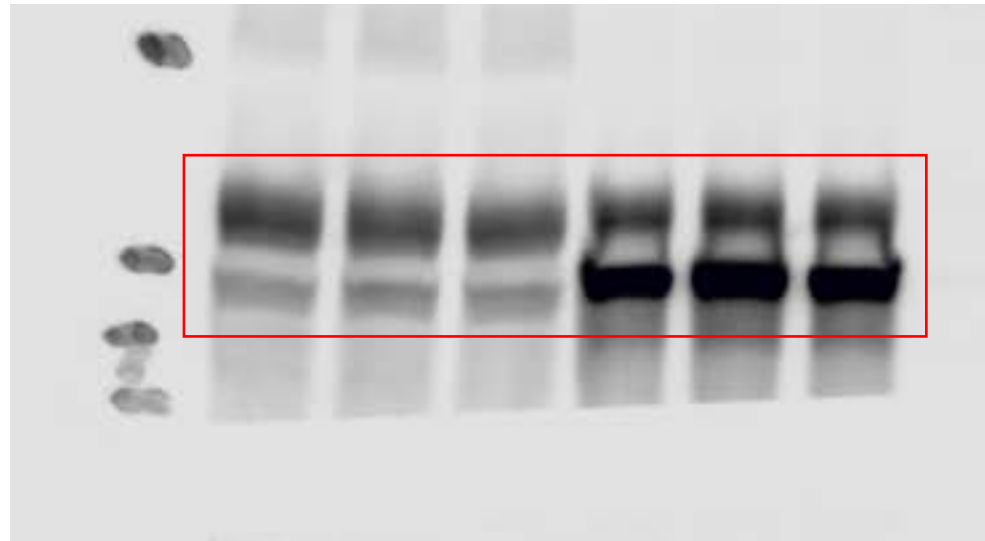



# Figure S3K- Ub

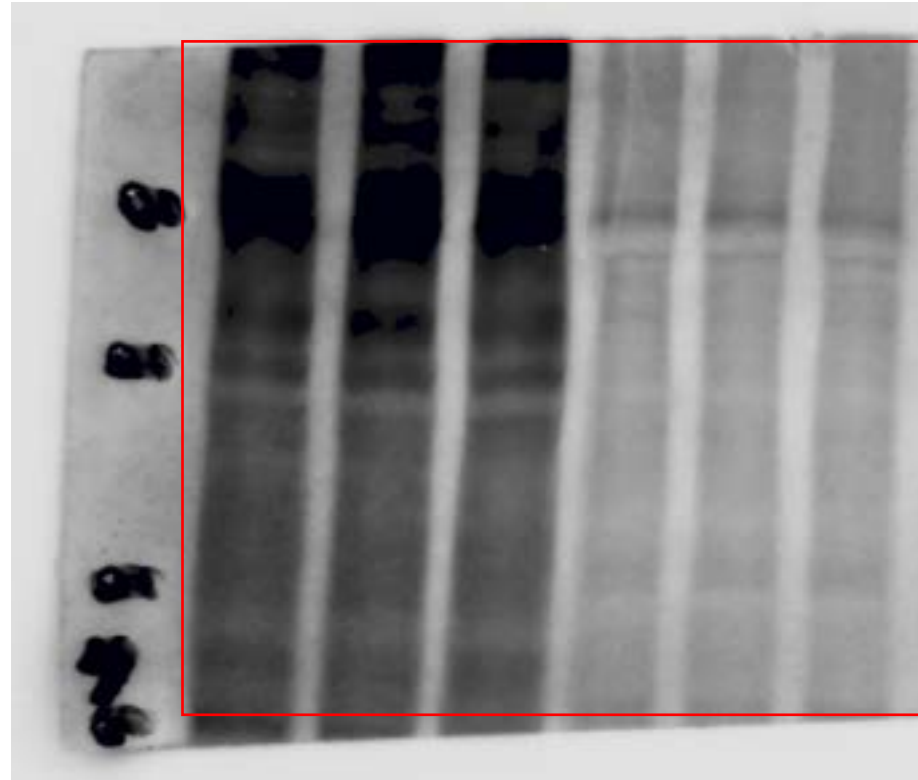

# Figure S4A- NLK

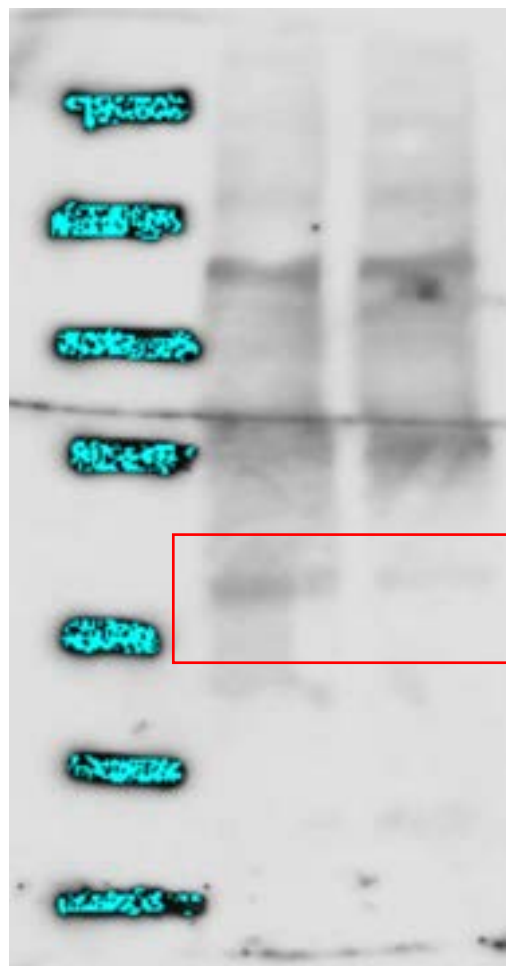

# Figure S4A- Vinculin

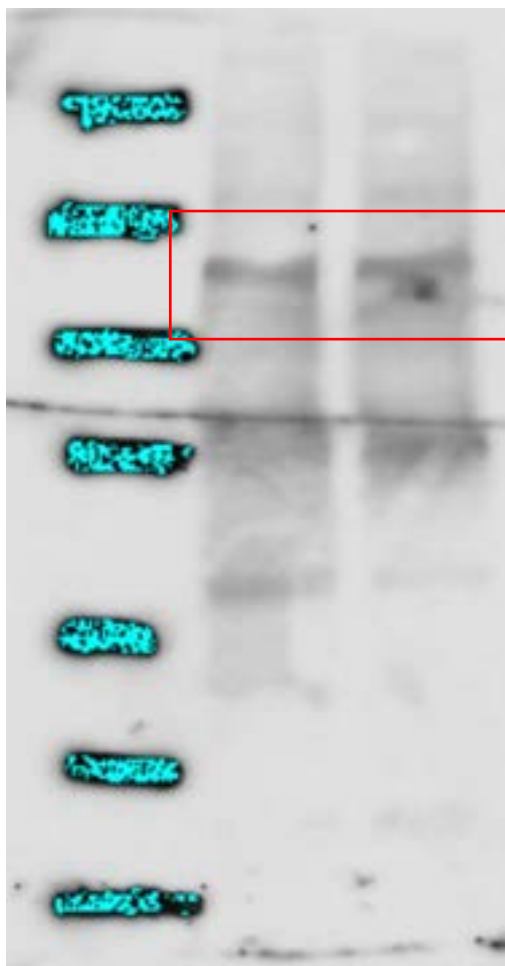

# Figure S5A- p4E-BP1

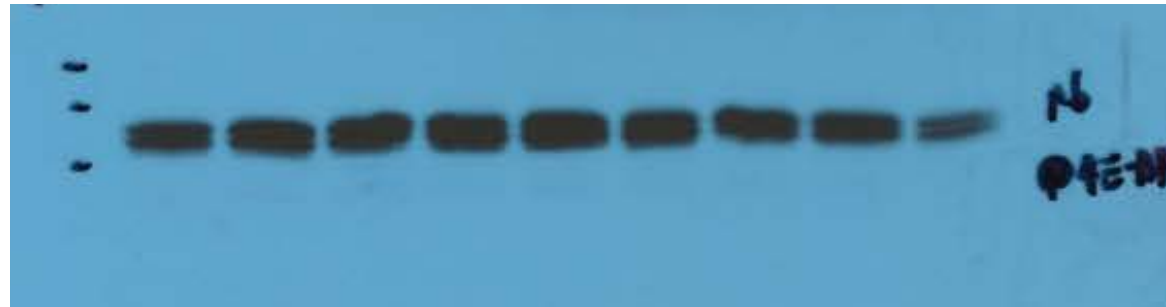

# Figure S5A- 4E-BP1

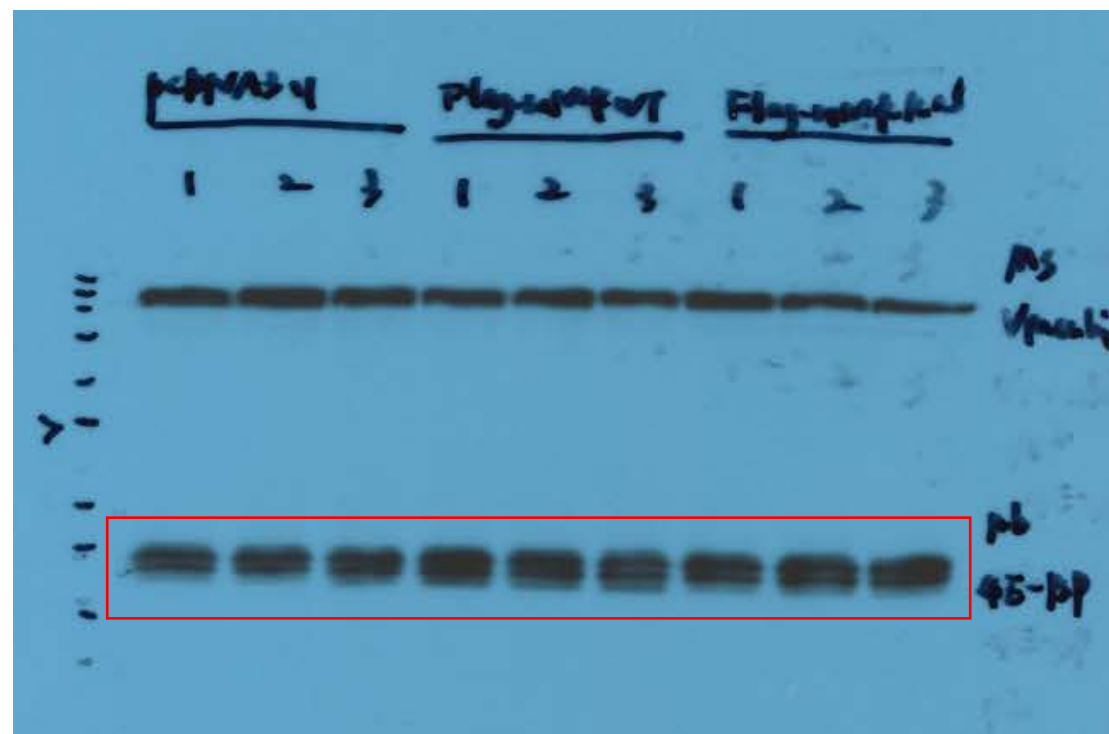

# Figure S5A- pS6

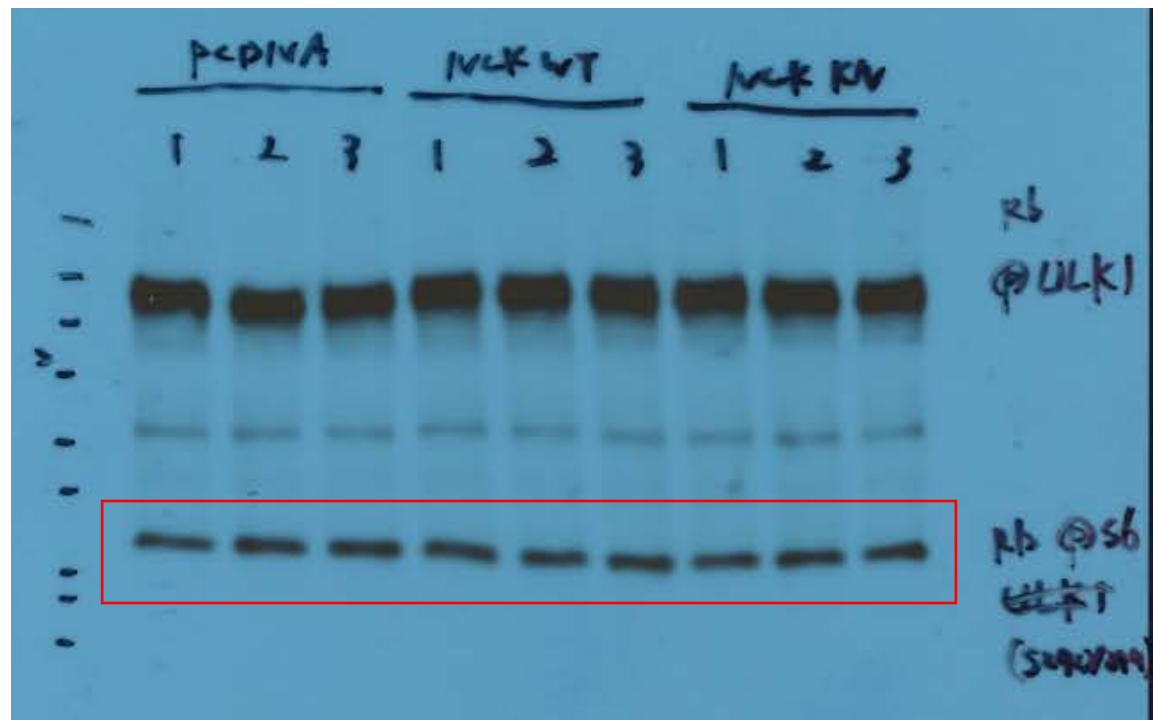

# Figure S5A- S6

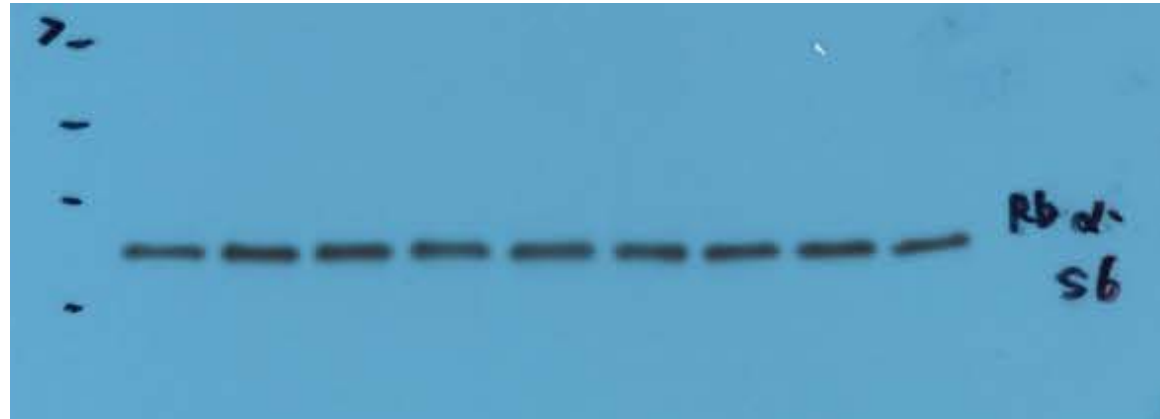





# Figure S5A- ULK1

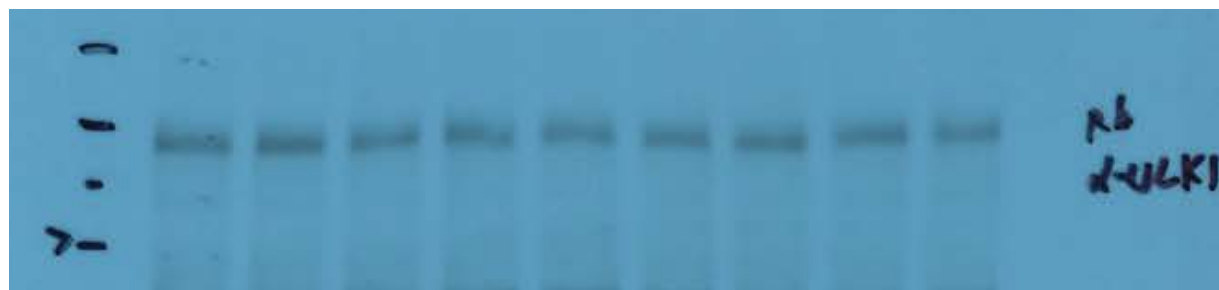

# Figure S5A- Flag (Nik)

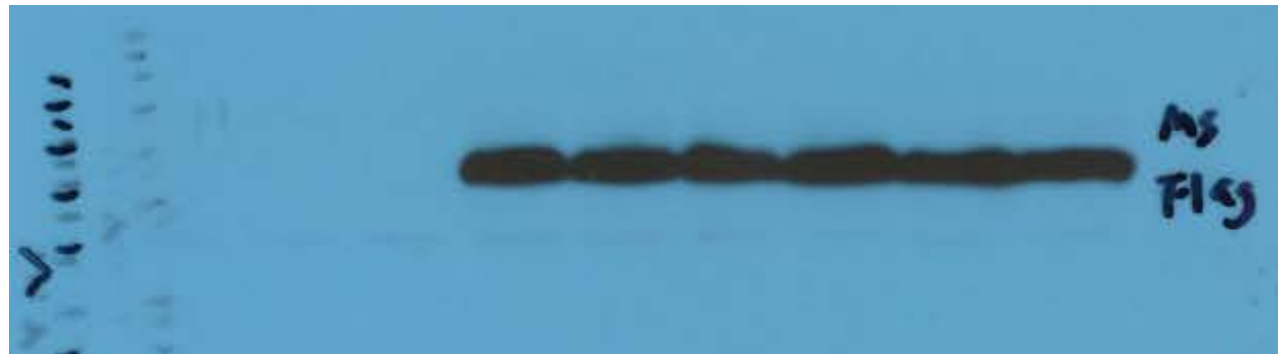

# Figure S5A- Vinculin

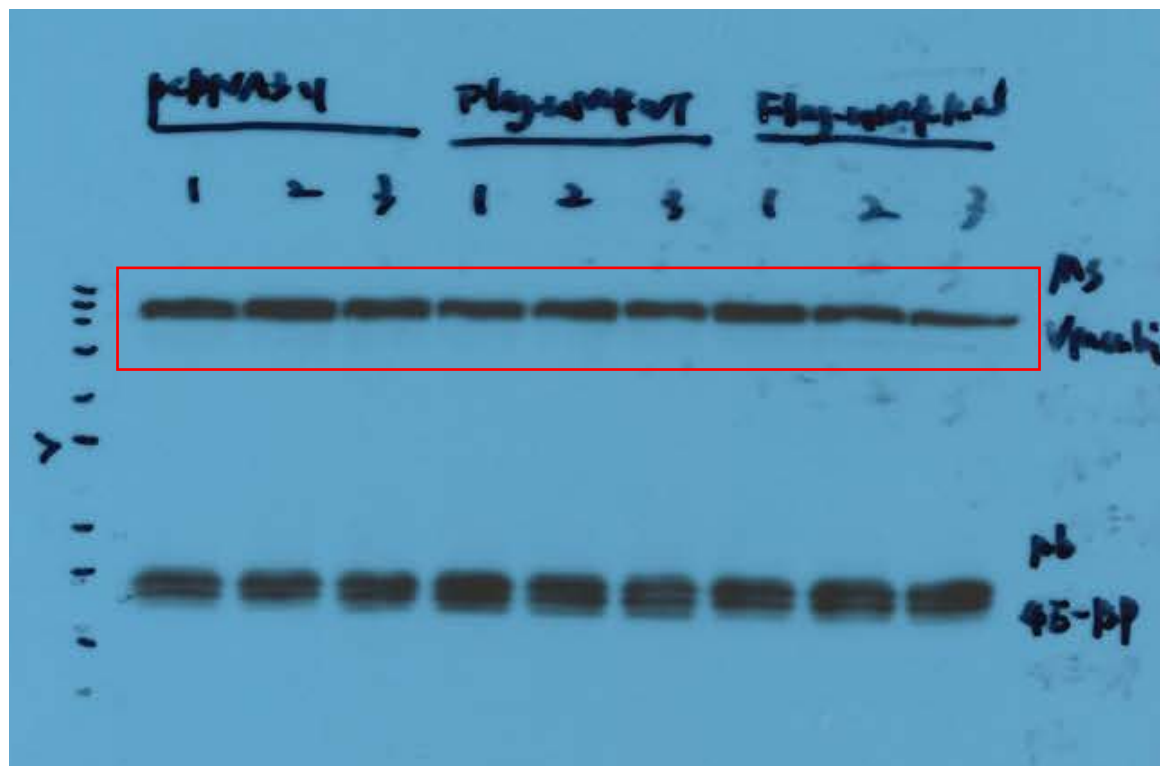

# Figure S5C- pS6

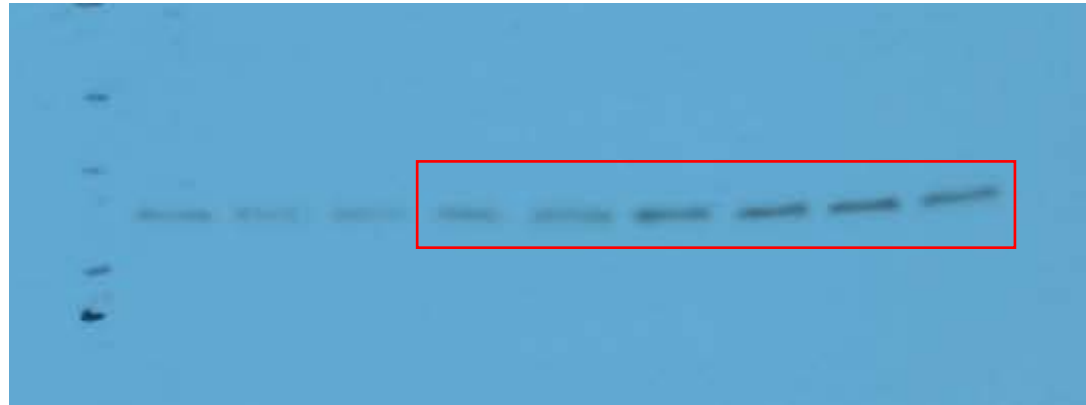

# Figure S5C- S6

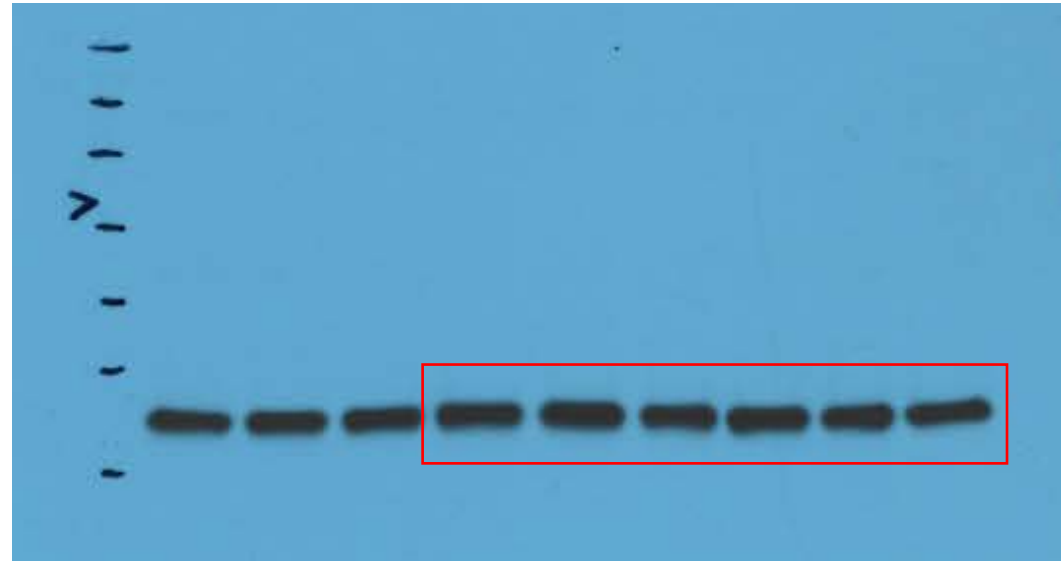

# Figure S5C- pULK1

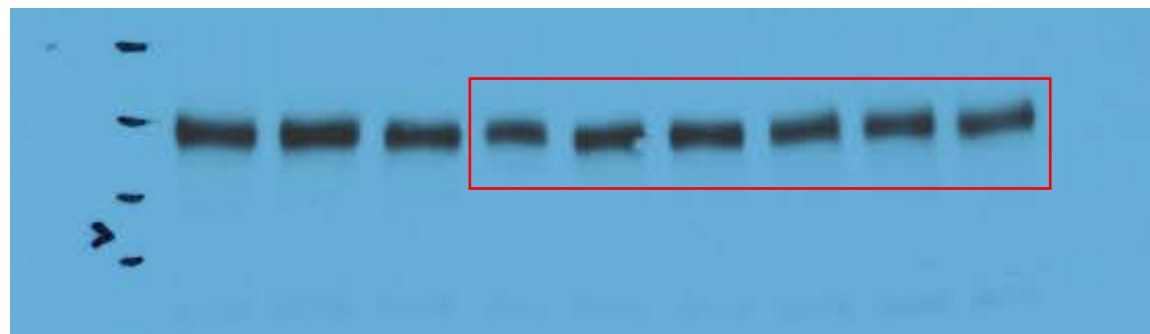

# Figure S5C- ULK1

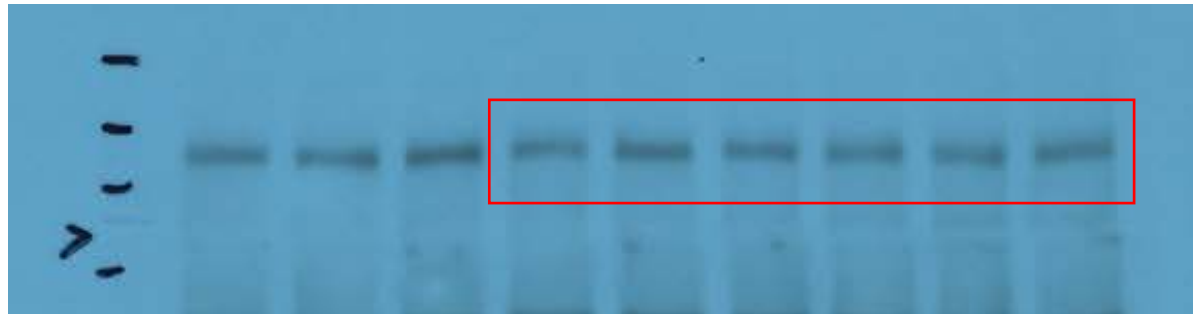

# Figure S5C- NIK

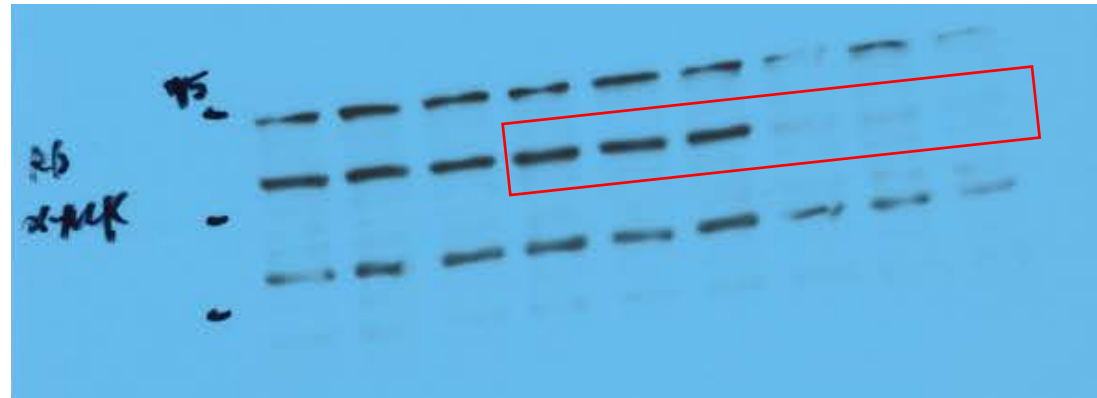



# Figure S5C- Actin

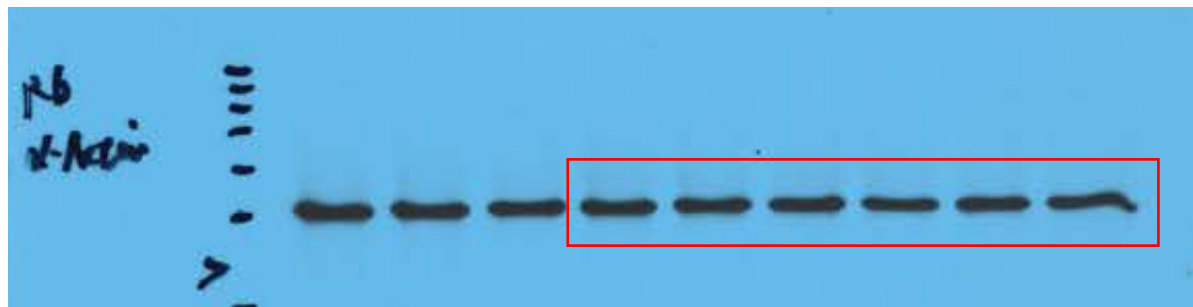

Figure S6A- HA

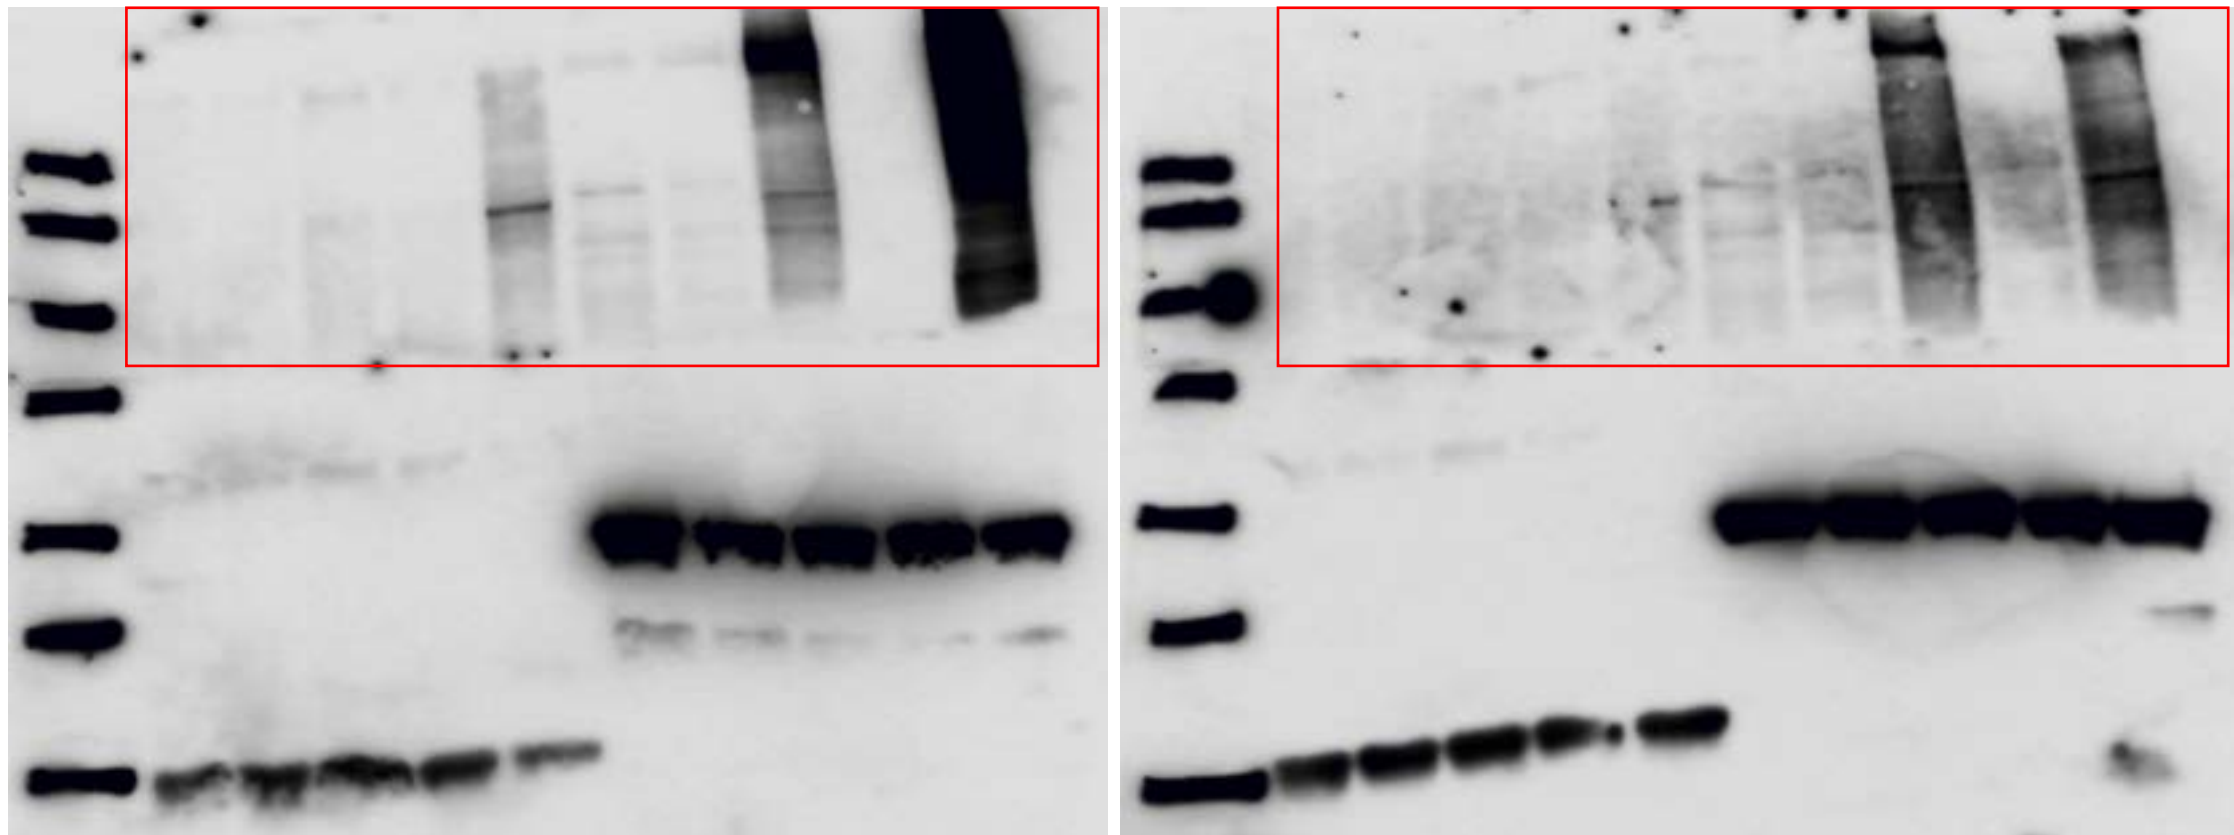

Figure S6A- TDP-43 (high exp.)

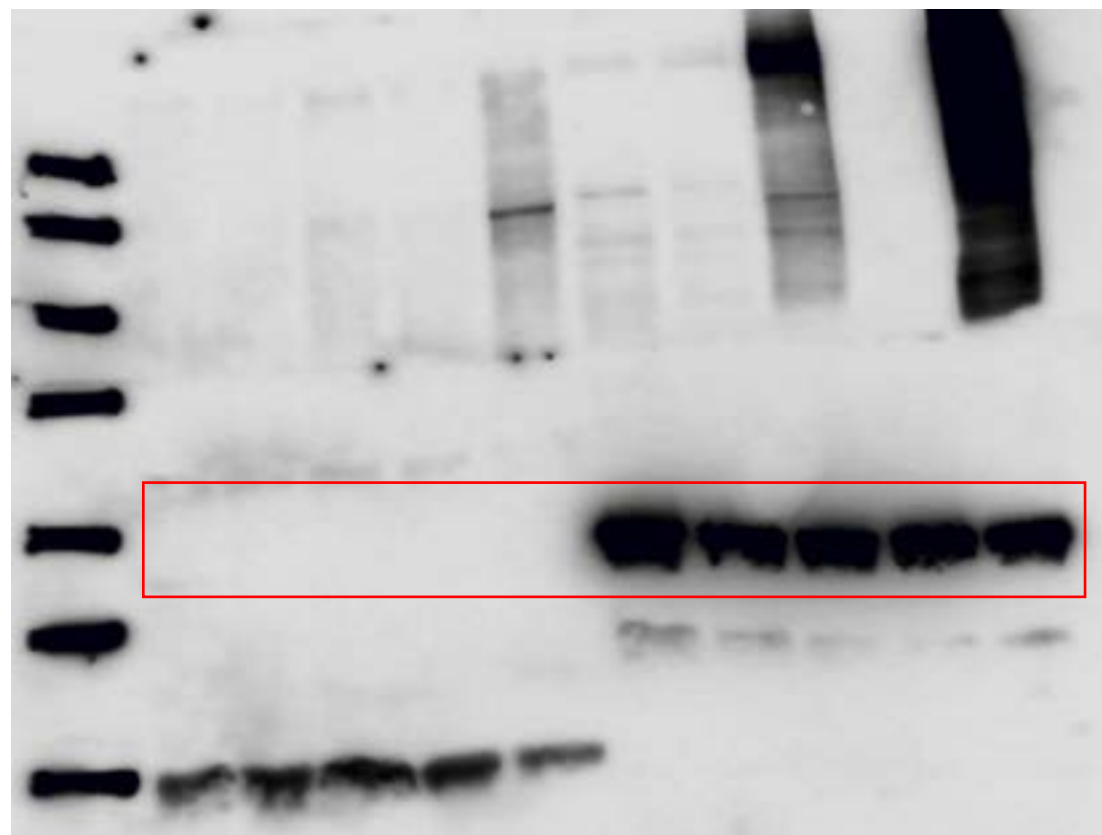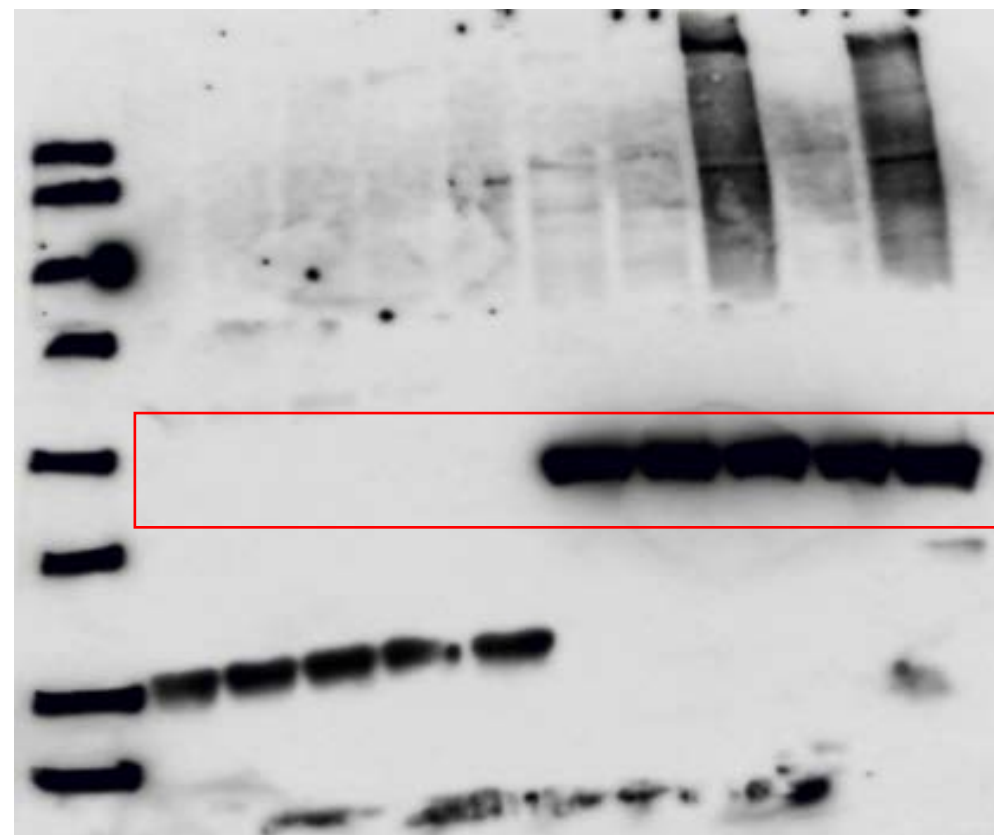

Figure S6A- TDP-43 (low exp.)

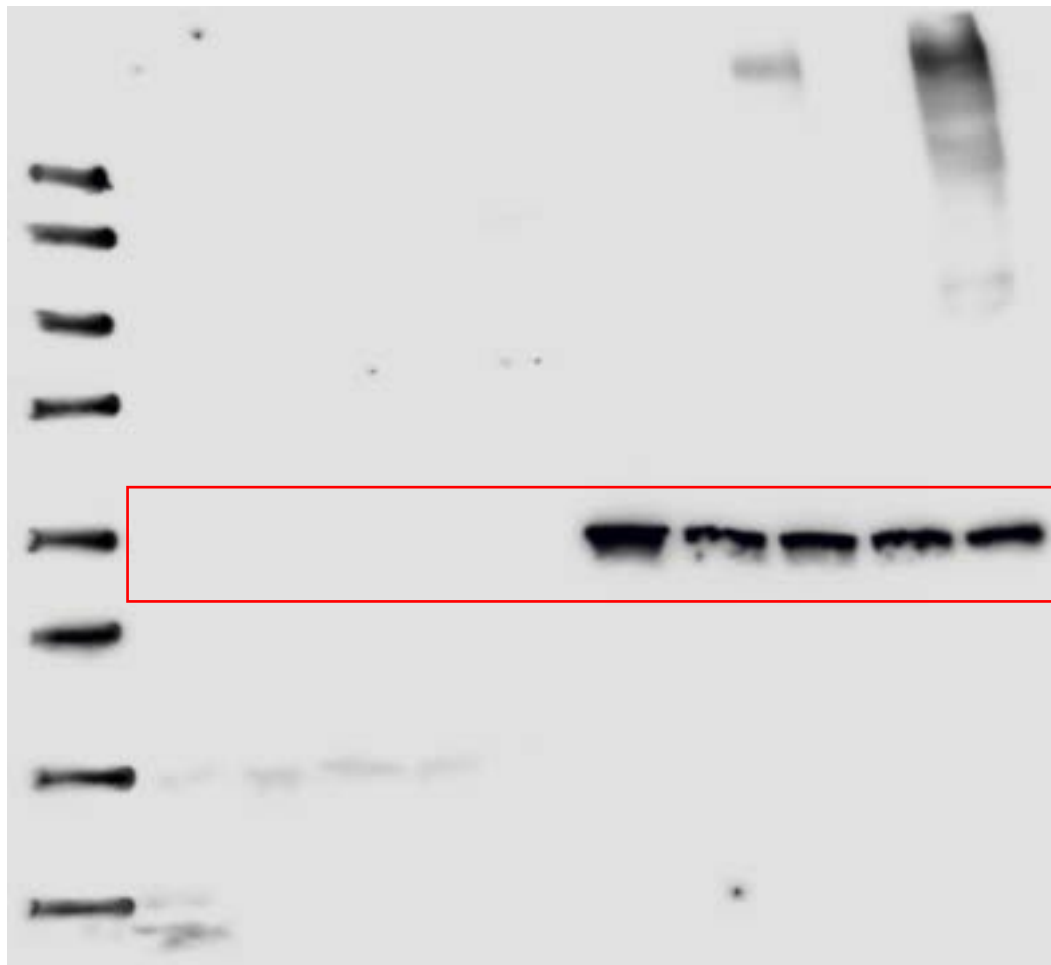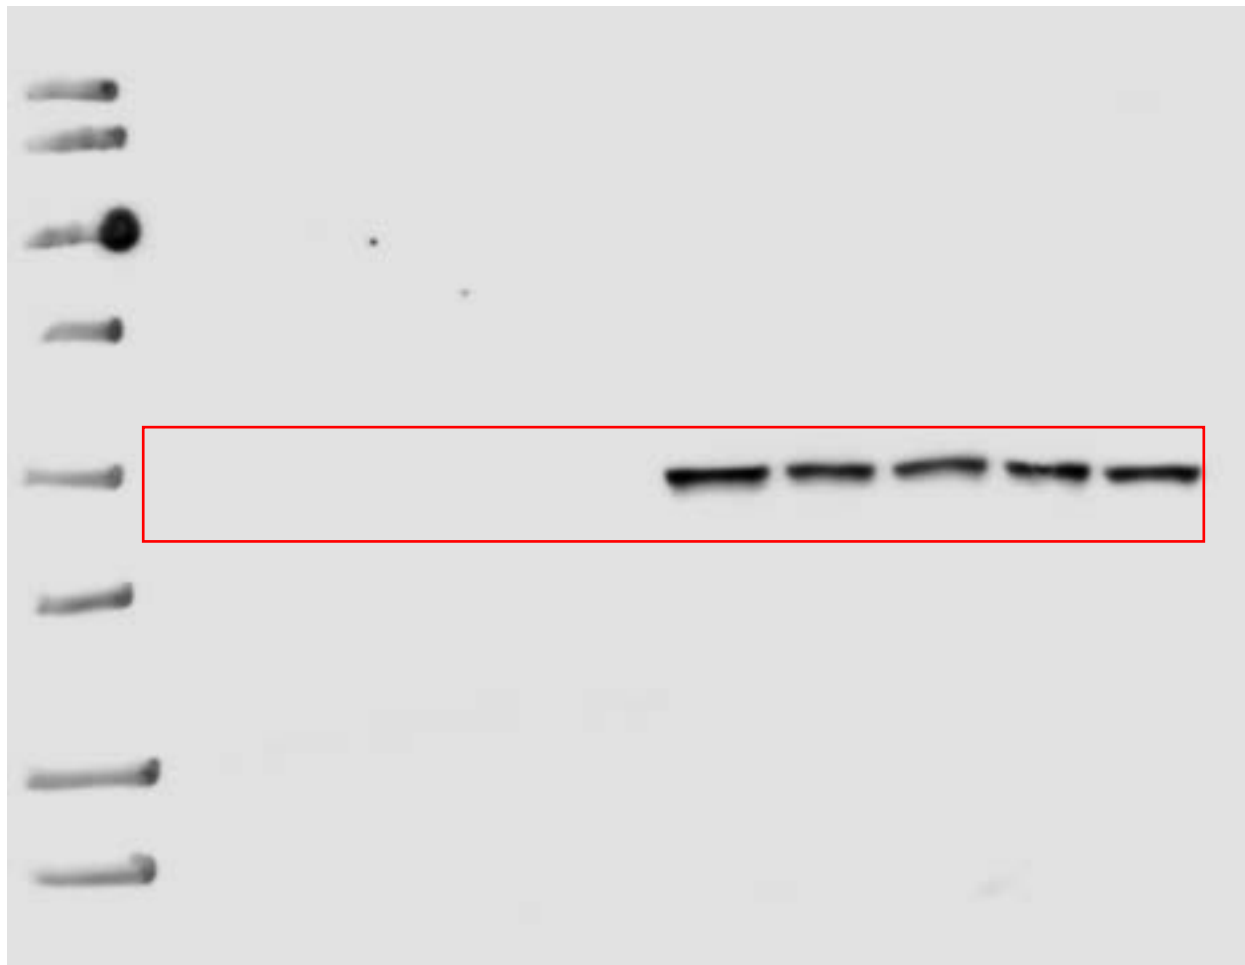

# Figure S6A- NIK

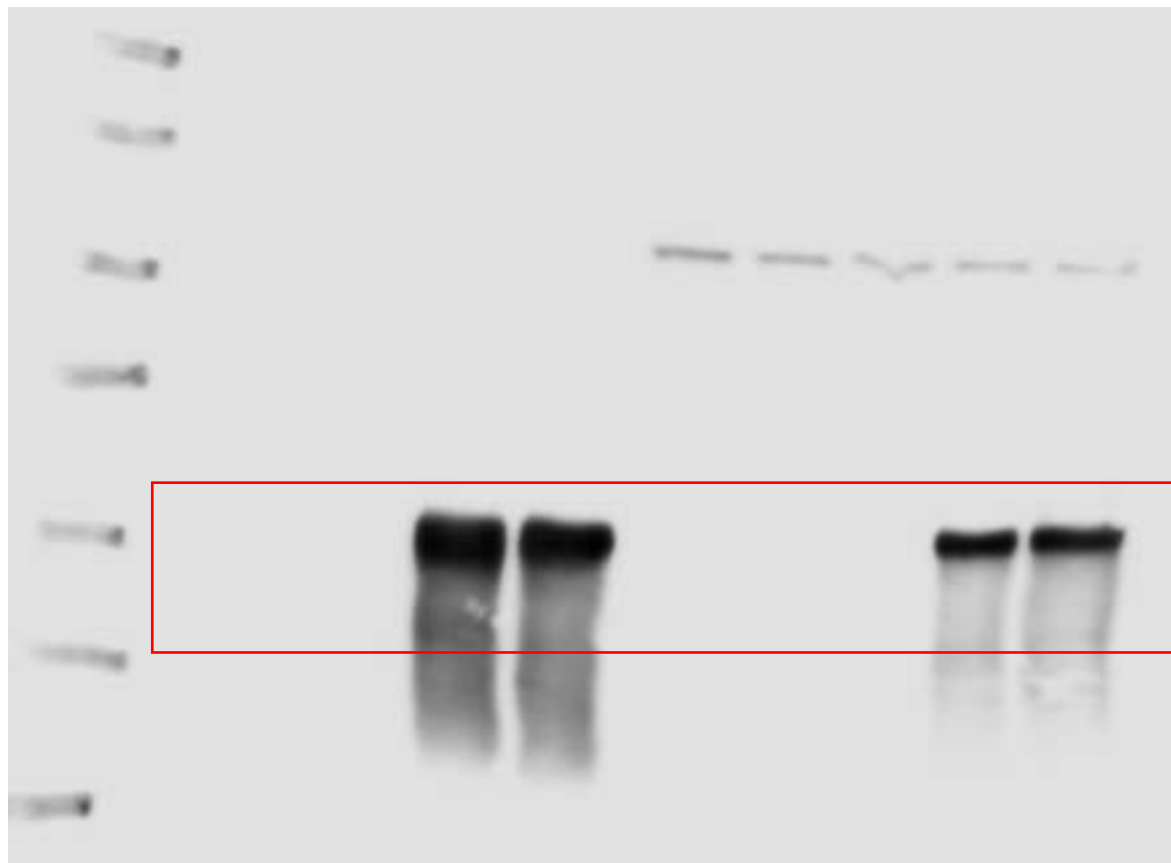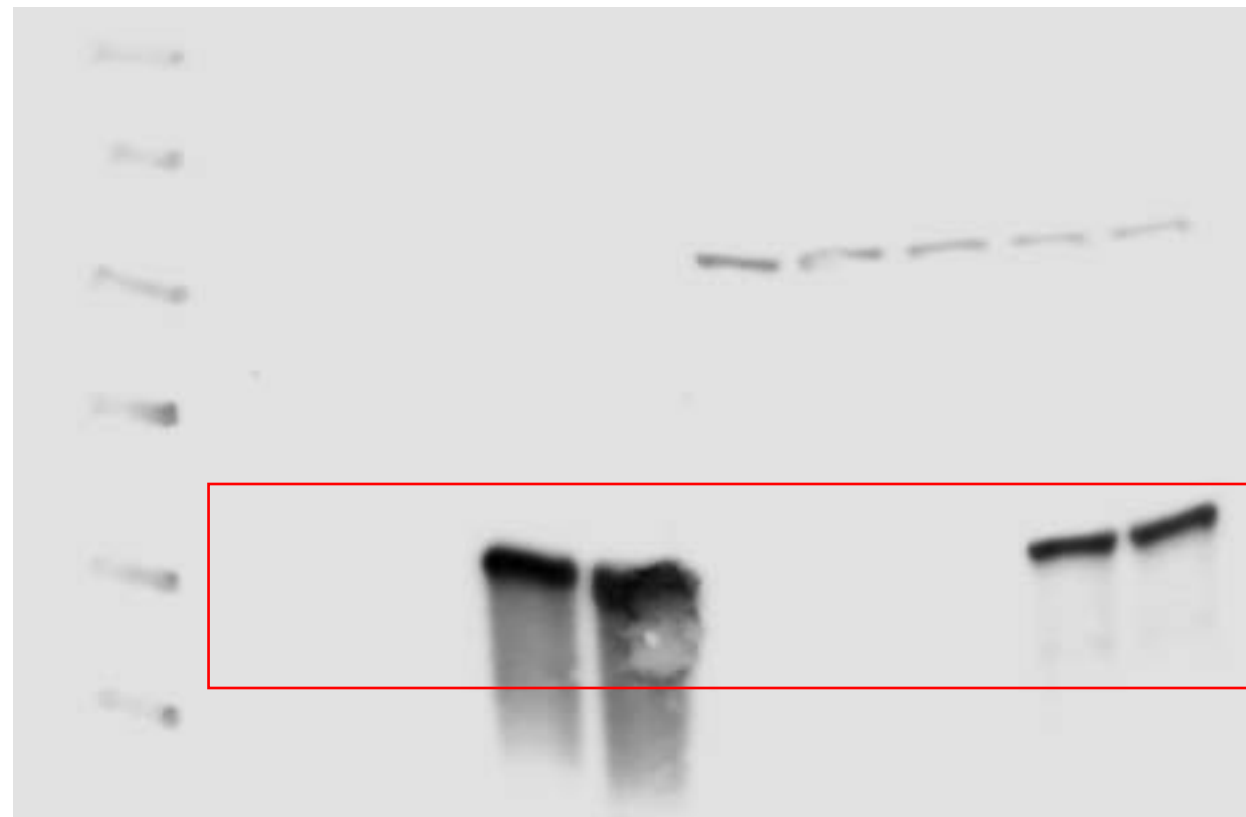

# Figure S6A- Vinculin

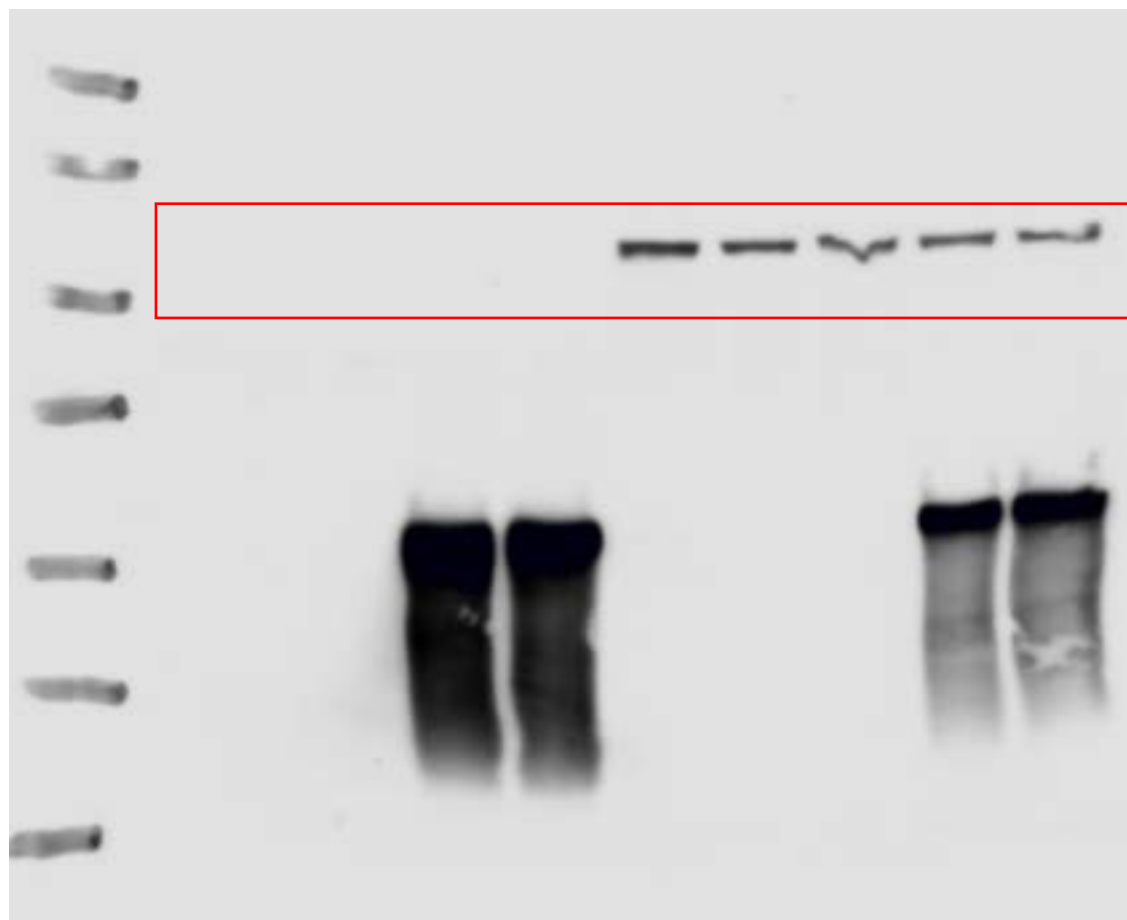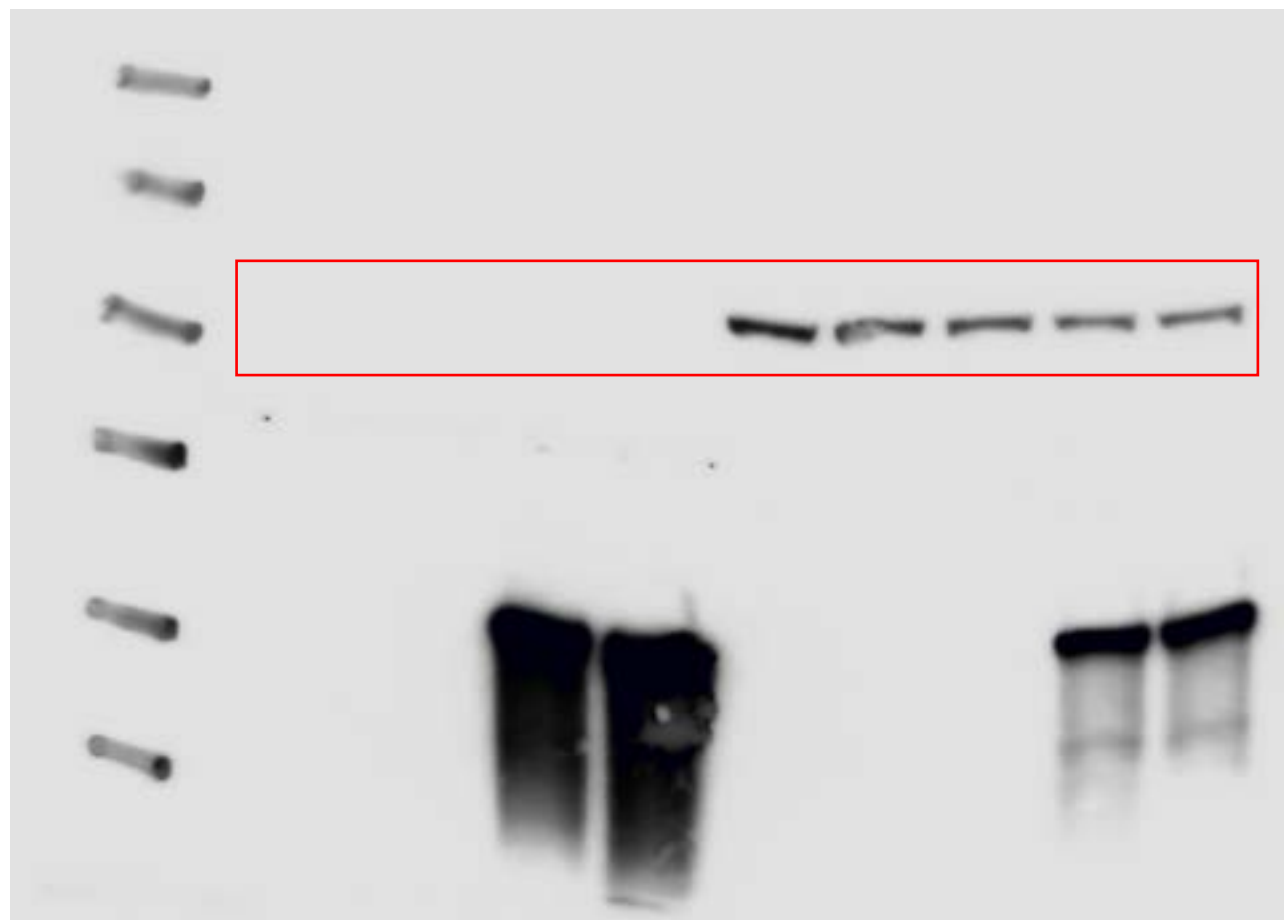

# Figure S6B- HA

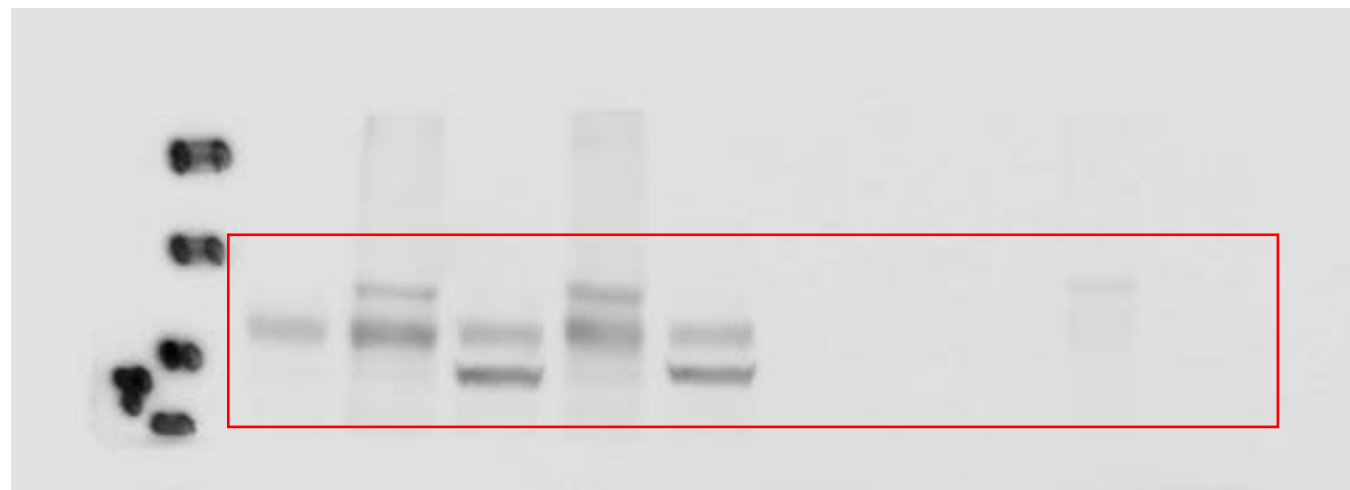

# Figure S6B- Flag

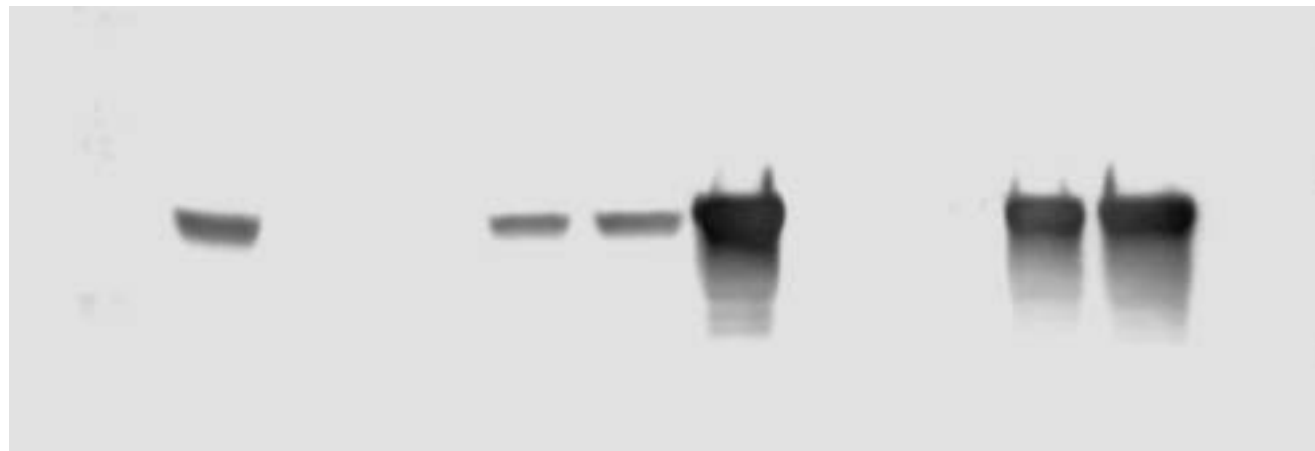



# Figure S6B- Gapdh

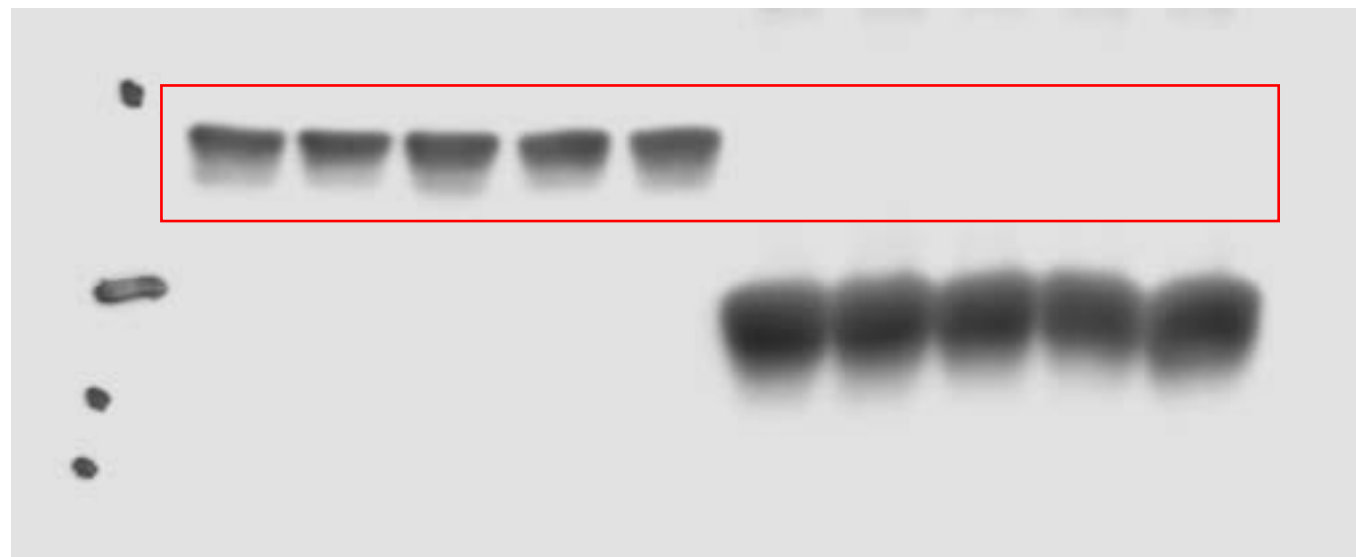

Supplement: jci-133-138207-s010.pdf [file jci-133-138207-s010.pdf]
